# Supplementary material for: Electrochemical decarboxylative C3 alkylation of quinoxalin-2(1H)-ones with N-hydroxyphthalimide esters
Source: Royal Society of Chemistry journal article supplement (doi:10.1039/d0cc05391k), 2020-01-01
Supplement: d0cc05391k1.pdf [file d0cc05391k1.pdf]

## Supporting Information

# Electrochemical Decarboxylative C<sub>3</sub> Alkylation of Quinoxalin-2(1*H*)-ones with *N*-hydroxyphthalimide Esters

Kaikai Niu,<sup>†</sup> Lingyun Song,<sup>†</sup> Yanke Hao,<sup>†</sup> Yuxiu Liu<sup>†</sup> and Qingmin Wang<sup>\*†‡</sup>

<sup>†</sup>State Key Laboratory of Elemento-Organic Chemistry, Research Institute of Elemento-Organic Chemistry, College of Chemistry, Nankai University, Tianjin 300071, People's Republic of China

<sup>‡</sup>Collaborative Innovation Center of Chemical Science and Engineering (Tianjin), Tianjin 300071, People's Republic of China

## Contents

|                                                                |        |
|----------------------------------------------------------------|--------|
| 1. General Information.....                                    | S3     |
| 2. Preparation of <i>N</i> -hydroxyphthalimide Ester.....      | S3     |
| 3. Preparation of Quinoxalin-2(1 <i>H</i> )-one.....           | S3     |
| 4. General procedure for the electrolysis.....                 | S3     |
| 5. Gram-scale Reaction.....                                    | S4     |
| 6. One-pot synthesis.....                                      | S4     |
| 7. Use of 3-V battery as a readily available power source..... | S5     |
| 8. Mechanistic Studies.....                                    | S6-8   |
| 9. Cyclic voltammetry (CV) tests.....                          | S8     |
| 10. Characterization Data for Electrolysis Products.....       | S8-21  |
| 11. X-ray Crystallography.....                                 | S21-27 |
| 12. Spectra of prepared compounds.....                         | S28-64 |
| 13. References.....                                            | S65    |

## 1. General Information

Unless otherwise noted, Reagents were purchased from commercial sources and were used as received.  $^1\text{H}$  and  $^{13}\text{C}$  Nuclear Magnetic Resonance (NMR) spectra were recorded on Bruker Avance 400 Ultrashield NMR spectrometers. Chemical shifts ( $\delta$ ) were given in parts per million (ppm) and were measured downfield from internal tetramethylsilane. High-resolution mass spectrometry (HRMS) data were obtained on an FTICR-MS instrument (Ionspec 7.0 T). The melting points were determined on an X-4 microscope melting point apparatus and are uncorrected. Conversion was monitored by thin layer chromatography (TLC). Flash column chromatography was performed over silica gel (100-200 mesh).

## 2. Preparation of *N*-hydroxyphthalimide ester

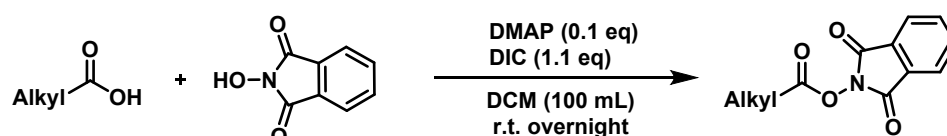

*N*-hydroxyphthalimide Esters was prepared from alkyl carboxylic acids following the procedure of Baran and co-workers<sup>1</sup> on 20 mmol scale. To a solution of the corresponding acid (20 mmol, 1.0 equiv.), 4-dimethylaminepyridine (244 mg, 2 mmol, 0.1 equiv.) and *N,N'*-diisopropylcarbodiimide (3.4 mL, 22 mmol, 1.1 equiv.) in DCM (100 mL) was stirred under air at room temperature for 5 min. Then, the NHPI (3.26 g, 20 mmol, 1.0 equiv.) was added into the solution and stirred overnight at room temperature. After reaction, the mixture was filtered and the filtrate was concentrated *in vacuo*. Finally, the residue was purified by chromatography on silica gel, eluted with petroleum/ethyl acetate to afford the desired product. The compound **2a-2q** was previously reported.

## 3. Preparation of quinoxalin-2(1*H*)-one

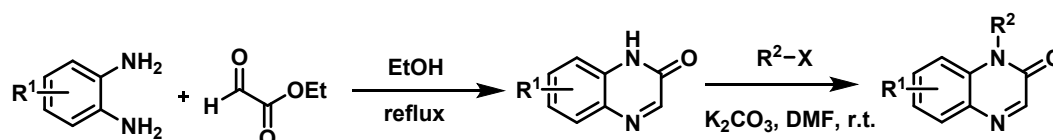

Quinoxalin-2(1*H*)-one was prepared from 1,2-phenylenediamines following the procedure of Cui and co-workers<sup>2</sup> on 5 mmol scale. To a solution of 1,2-phenylenediamines (5 mmol, 1.0 equiv.) in ethanol (40 mL) was added ethyl glyoxalate (6 mmol, 1.2 equiv.). The resultant reaction mixture was stirred at reflux until the raw material disappears. Then, the mixture was filtered and washed by ethanol. The solid was dried *in vacuo*. For alkylation, the corresponding halogenoalkane (1.6 equiv.) was added to a suspension of quinoxalinone (1.0 equiv.) and potassium carbonate (1.2 equiv.) in DMF (16 mL). The mixture was stirred at room temperature overnight. After complete reaction, brine was added, and then extracted three times with EtOAc. The combined organic layers were washed with a saturated solution of NH<sub>4</sub>Cl then brine, dried over anhydrous Na<sub>2</sub>SO<sub>4</sub>, filtered and evaporated *in vacuo*. The residue was purified by column chromatography on silica gel to afford the desired product. The compound **1a-1q** was previously reported.

## 4. General procedure for the electrolysis

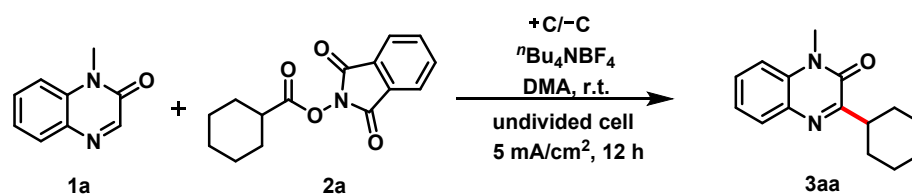

An oven-dried 10 mL undivided bottle was equipped with two graphite sheet electrodes (10 mm × 10 mm × 3 mm). The corresponding quinoxalin-2(1*H*)-one (80.0 mg, 0.5 mmol, 1.0 equiv.), the *N*-hydroxyphthalimide ester (273.1 mg, 1.0 mmol, 2.0 equiv.) and <sup>t</sup>Bu<sub>4</sub>NBF<sub>4</sub> (329 mg, 1.0 mmol, 2.0 equiv.) was added into the undivided cell. And then DMA (5 mL) was added. The reaction mixture was stirred and electrolyzed at a constant current of 5.0 mA under room temperature for 12 h. The reaction was quenched with brine (50 mL) and extracted with EtOAc (3 × 20 mL). Then the combined organic layers were filtered, dried over anhydrous Na<sub>2</sub>SO<sub>4</sub> and concentrated *in vacuo*. The pure product was obtained by flash column chromatography on silica gel (petroleum ether/ethyl acetate).

## 5. Gram-scale reaction

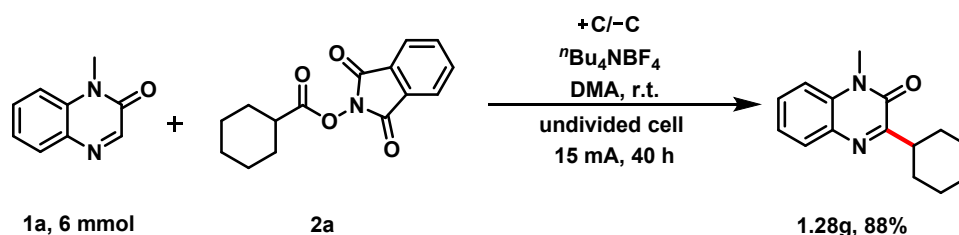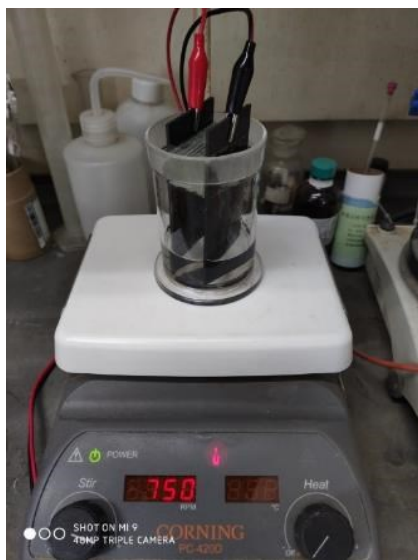

A 200 mL bottle with a stir bar was charged with quinoxalin-2(1*H*)-one (0.96 g, 6.0 mmol, 1.0 equiv.), *N*-hydroxyphthalimide ester (3.28 g, 12.0 mmol, 2.0 equiv.), <sup>t</sup>Bu<sub>4</sub>NBF<sub>4</sub> (3.95 g, 12.0 mmol, 2.0 equiv.) and DMA (50 mL). The bottle equipped with two graphite sheet electrodes (300 mm × 500 mm × 3 mm) were inserted into the mixture. The reaction mixture was electrolyzed under a constant current of 15 mA for 40 h. After the reaction, the electrodes were removed and rinsed with EtOAc. Brine was then added; the resulting mixture was extracted with EtOAc. The combined organic layer was dried over anhydrous Na<sub>2</sub>SO<sub>4</sub> and concentrated *in vacuo*. The crude material was purified by column chromatography (petroleum ether/ethyl acetate = 10:1) to

furnish the desired product in 88% yield as a white solid.

## 6. One-pot synthesis

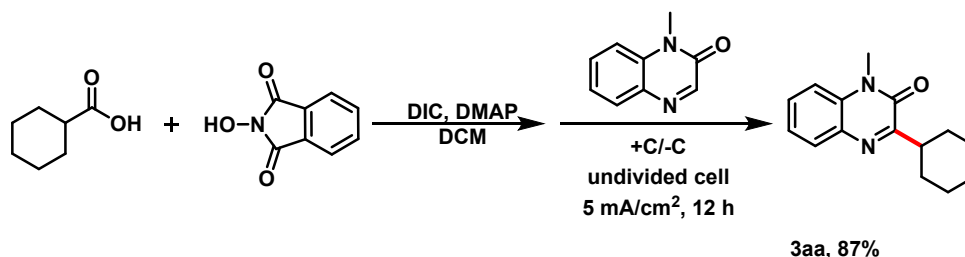

An oven-dried 10 mL undivided bottle was charged with cyclohexanecarboxylic acid (128.2 mg, 1.0 mmol, 1.0 equiv.), 4-dimethylaminepyridine (24.4 mg, 0.2 mmol, 0.2 equiv.), *N,N*-diisopropylcarbodiimide (0.2 mL, 1.2 mmol, 1.2 equiv.), NHPI (179.4 mg, 1.1 mmol, 1.1 equiv.) and DCM (1 mL). After stirred for 30 min, quinoxalin-2(1*H*)-one (80.0 mg, 0.5 mmol, 1.0 equiv.),  $n\text{Bu}_4\text{NBF}_4$  (329 mg, 1.0 mmol, 2.0 equiv.) and DMA (5 mL) was added into the undivided bottle. Two graphite sheet electrodes (10 mm × 10 mm × 3 mm) were inserted into the mixture, and the reaction mixture was electrolyzed under a constant current of 5 mA for 12 h. After the reaction, brine was then added and extracted with EtOAc. The combined organic layer was dried over anhydrous  $\text{Na}_2\text{SO}_4$  and concentrated *in vacuo*. The crude material was purified by column chromatography (petroleum ether/ethyl acetate = 10:1) to furnish the desired product in 87% yield as a white solid.

#### 7. Use of 3-V battery as a readily available power source

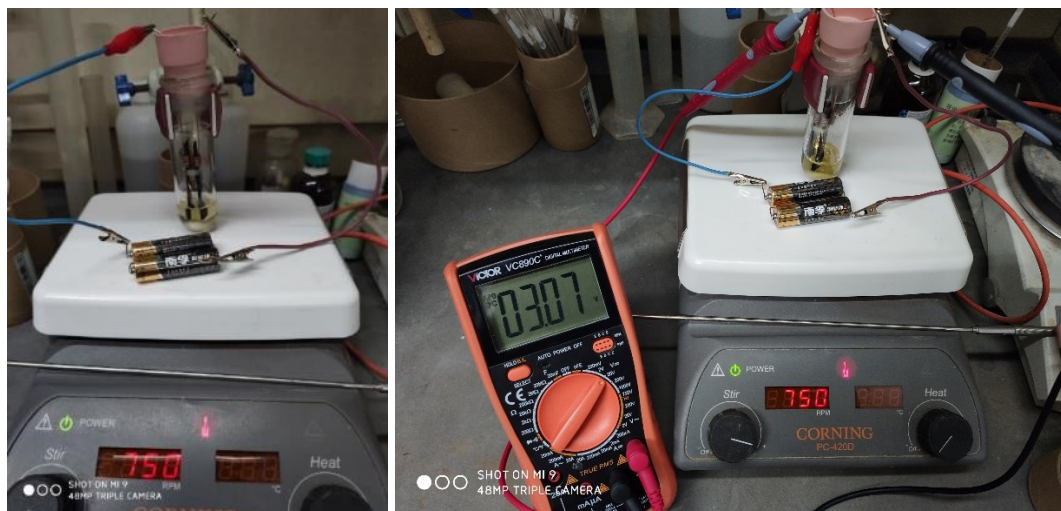

An oven-dried 10 mL undivided bottle was charged with quinoxalin-2(1*H*)-one (80.0 mg, 0.5 mmol, 1.0 equiv.), *N*-hydroxyphthalimide ester (273.1 mg, 1.0 mmol, 2.0 equiv.),  $n\text{Bu}_4\text{NBF}_4$  (329 mg, 1.0 mmol, 2.0 equiv.) and DMA (5 mL). Two graphite sheet electrodes (10 mm × 10 mm × 3 mm) were inserted into the mixture. Two 1.5 v NanFu batteries were connected by copper wires in series and were used as the power source. After the reaction, the resulting mixture was quenched with brine and extracted with EtOAc. The combined organic layer was dried over anhydrous  $\text{Na}_2\text{SO}_4$  and concentrated *in vacuo*. The crude material was purified by column chromatography (petroleum ether/ethyl acetate = 10:1) to furnish the desired product in 90%

yield as a white solid.

## 8. Mechanistic Studies

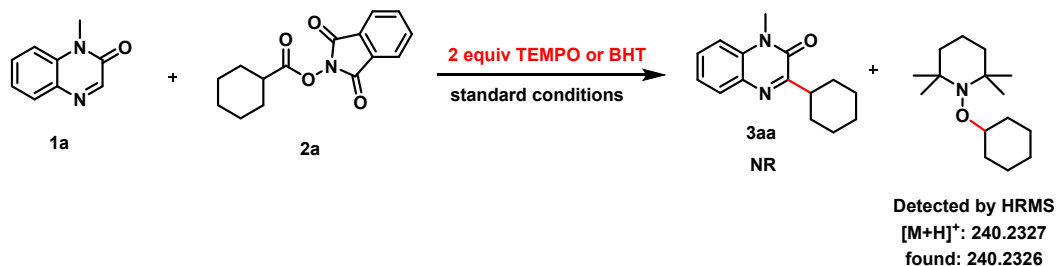

To a 10 mL oven-dried undivided bottle was added quinoxalin-2(1*H*)-one (80.0 mg, 0.5 mmol, 1.0 equiv.), *N*-hydroxyphthalimide ester (273.1 mg, 1.0 mmol, 2.0 equiv.), TEMPO (156.3 mg, 1.0 mmol, 2.0 equiv.), <sup>n</sup>Bu<sub>4</sub>NBF<sub>4</sub> (329 mg, 1.0 mmol, 2.0 equiv.) and DMA (5 mL). The reaction mixture was stirred and electrolyzed at a constant current of 5.0 mA under room temperature for 12 h. The reaction was completely suppressed. The radical trapping product 1-(cyclohexyloxy)-2,2,6,6-tetramethylpiperidine can be observed by HR-MS (positive mode ESI). A similar procedure was conducted with BHT (220.4 mg, 1.0 mmol, 2.0 equiv.). The reaction was also completely suppressed.

D:\WD\lData\20200713-03\203A

07/13/20 15:42:23

203A #16-24 RT: 0.08-0.11 AV: 9 SB: 92 1.25-1.65 NL: 8.88E6  
T: FTMS + p ESI Full ms [100.0000-1000.0000]

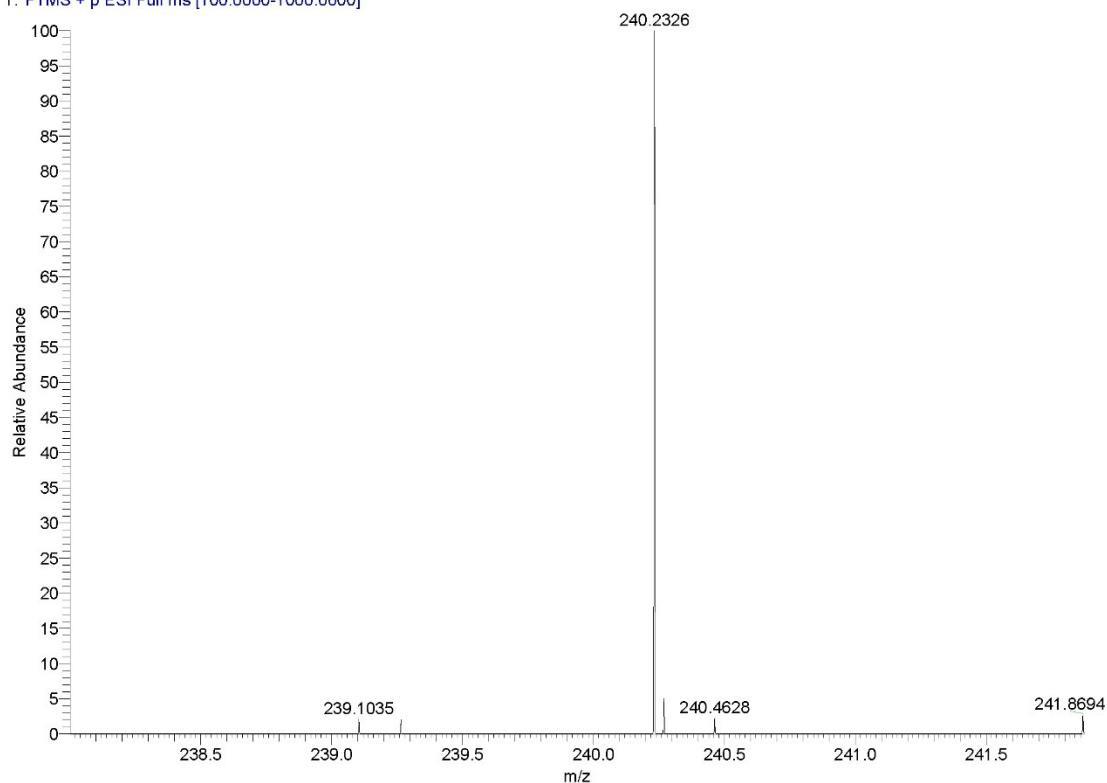

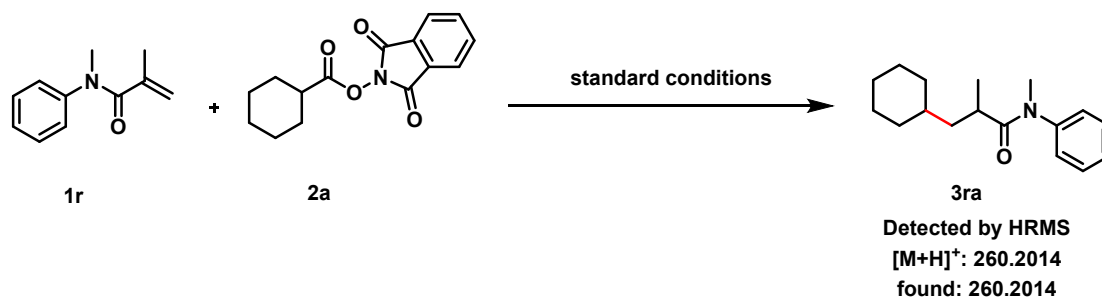

To a 10 mL oven-dried undivided bottle was added *N*-phenylmethacrylamide **1r** (87.6 mg, 0.5 mmol, 1.0 equiv.), *N*-hydroxyphthalimide ester **2a** (273.1 mg, 1.0 mmol, 2.0 equiv.),  $n\text{-Bu}_4\text{NBF}_4$  (329 mg, 1.0 mmol, 2.0 equiv.) and DMA (5 mL). The reaction mixture was stirred and electrolyzed at a constant current of 5.0 mA under room temperature for 12 h. The product **3a** can be observed by HR-MS (positive mode ESI).

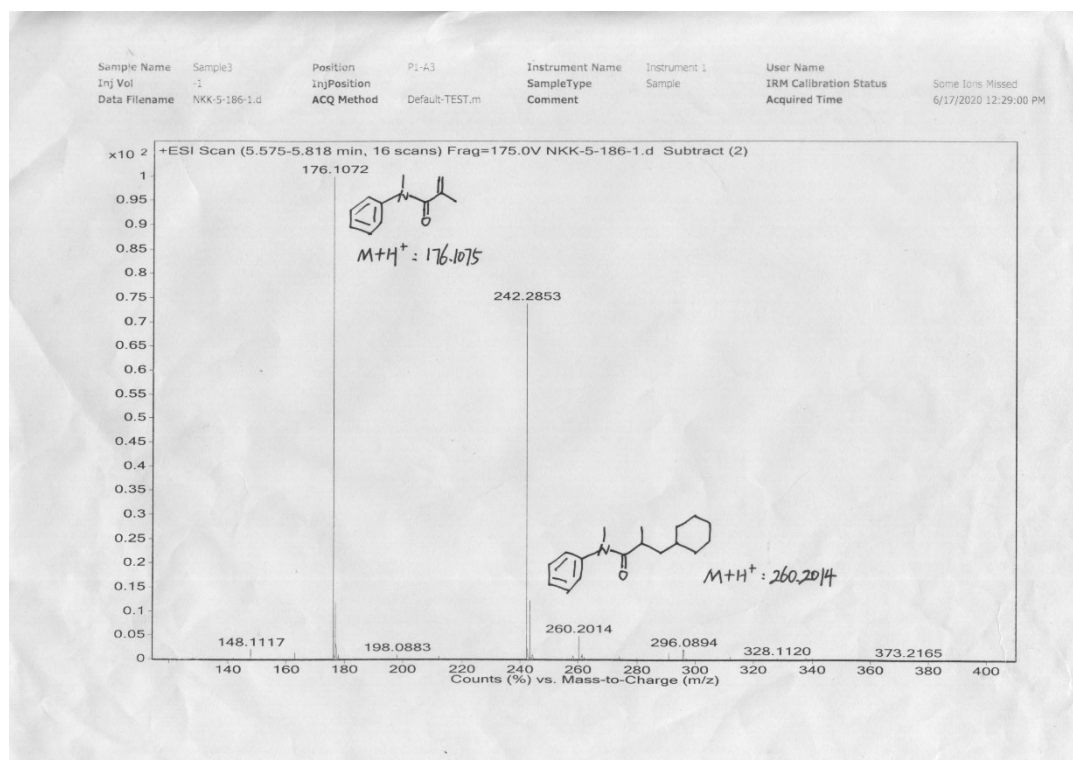

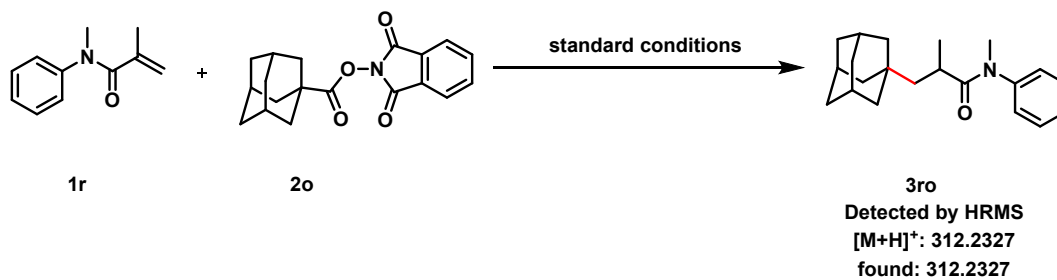

To a 10 mL oven-dried undivided bottle was added N-methyl-N-phenyl methacrylamide **1r** (87.6 mg, 0.5 mmol, 1.0 equiv.), N-hydroxyphthalimide ester **2o** (273.1 mg, 1.0 mmol, 2.0 equiv.), <sup>n</sup>Bu<sub>4</sub>NBF<sub>4</sub> (329 mg, 1.0 mmol, 2.0 equiv.) and DMA (5 mL). The reaction mixture was stirred and electrolyzed at a constant current of 5.0 mA under room temperature for 12 h. The product **3ro** can be observed by HR-MS (positive mode ESI).

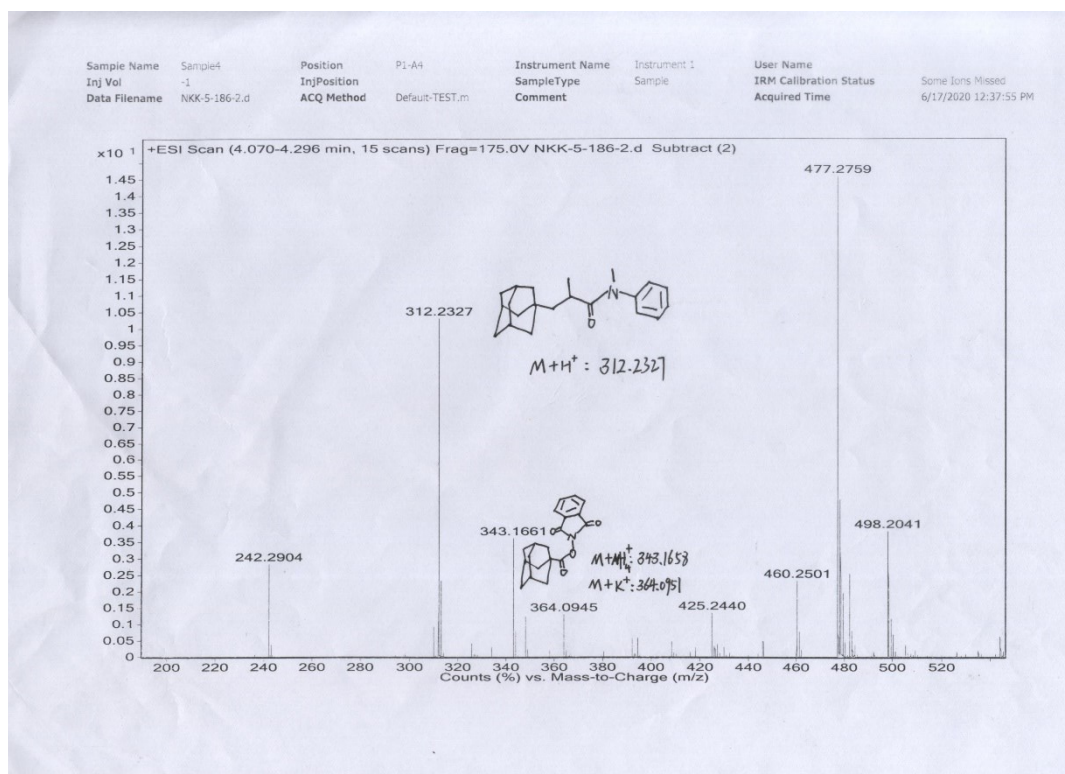

## 9. Cyclic voltammetry (CV) tests

The potential was calibrated versus an aqueous SCE by the addition of ferrocene as an internal standard taking  $E_{(Fc/Fc^+)}^0 = 0.424$  V vs SCE.<sup>18</sup>  $E^{1a}/1a^- = -1.67$  V vs SCE;  $E^{2a}/2a^- = -1.23$  vs SCE.



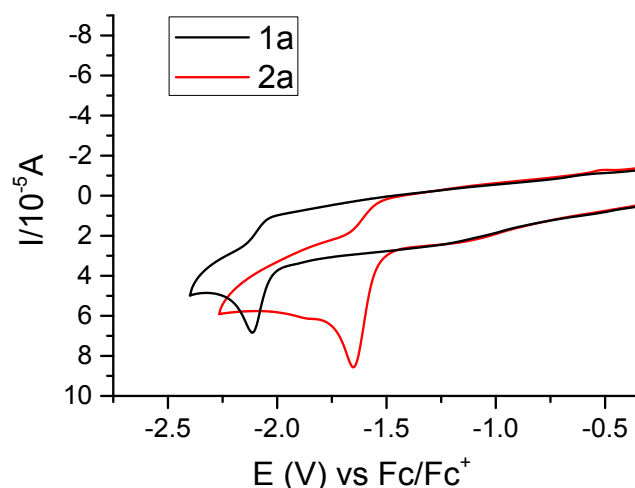

Figure 1. Cyclic voltammograms of compounds 1a and 2a in 0.1 M  $n\text{Bu}_4\text{NPF}_6/\text{MeCN}$  at a scan rate of 100 mV/s.

## 10. Characterization Data for Electrolysis Products

### 3-cyclohexyl-1-methylquinoxalin-2(1H)-one(3aa)

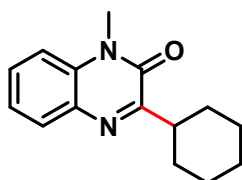

Electrolysis was conducted following the general procedure. The crude material was purified by flash column chromatography (silica gel, 20% EtOAc in petroleum ether) to give **3aa** as a white solid (111.3 mg, 92% yield).

**M. p.** = 103 – 104 °C;

**R<sub>f</sub>** = 0.50 (Petroleum ether /EtOAc = 10:1);

**<sup>1</sup>H NMR (400 MHz, CDCl<sub>3</sub>):**  $\delta$  7.83 (d,  $J$  = 8.0 Hz, 1H), 7.49 (t,  $J$  = 4.0 Hz, 1H), 7.35 – 7.23 (m, 2H), 3.69 (s, 3H), 3.34 (t,  $J$  = 12.0 Hz, 1H), 1.96 (d,  $J$  = 12.0 Hz, 2H), 1.86 (d,  $J$  = 12.0 Hz, 2H), 1.76 (d,  $J$  = 8.0 Hz, 1H), 1.40 – 1.65 (m, 4H), 1.23 – 1.37 (m, 1H);

**<sup>13</sup>C NMR (101 MHz, CDCl<sub>3</sub>):**  $\delta$  177.4, 164.2, 154.5, 134.9, 132.8, 132.8, 129.7, 129.3, 123.4, 113.4, 40.7, 30.5, 29.0, 26.3, 26.1;

**HRMS (ESI):** calc'd for C<sub>15</sub>H<sub>18</sub>N<sub>2</sub>O ([M+H]<sup>+</sup>) 243.1497, found 243.1492.

### 3-ethyl-1-methylquinoxalin-2(1H)-one(3ab)

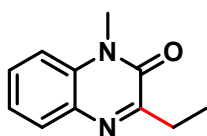

Electrolysis was conducted following the general procedure. The crude material was purified by flash column chromatography (silica gel, 10% EtOAc in petroleum ether) to give **3ab** as a white solid (62.0 mg, 66% yield).

**M. p.** = 96 – 98 °C;

**R<sub>f</sub>** = 0.30 (Petroleum ether /EtOAc = 5:1);

**<sup>1</sup>H NMR (400 MHz, CDCl<sub>3</sub>):**  $\delta$  7.84 (d,  $J$  = 8.0 Hz, 1H), 7.52 (t,  $J$  = 8.0 Hz, 1H), 7.39 – 7.24 (m, 2H), 3.70 (s, 3H), 2.97 (q,  $J$  = 8.0, 4.0 Hz, 2H), 1.34 (t,  $J$  = 4.0 Hz, 3H).

**<sup>13</sup>C NMR (101 MHz, CDCl<sub>3</sub>):**  $\delta$  161.9, 154.8, 133.1, 132.7, 129.6, 129.5, 123.5, 113.5, 28.9, 27.5, 10.8.

**HRMS (ESI):** calc'd for C<sub>11</sub>H<sub>12</sub>N<sub>2</sub>O ([M+H]<sup>+</sup>) 189.1028, found 189.1022.

### 1-methyl-3-pentylquinoxalin-2(1H)-one(3ac)

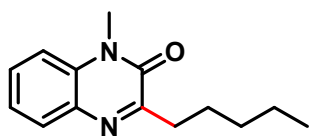

Electrolysis was conducted following the general procedure. The crude material was purified by flash column chromatography (silica gel, 20% EtOAc in petroleum ether) to give **3ac** as a white solid (80.9 mg, 70% yield).

**M. p.** = 75 – 76 °C;

**Rf** = 0.50 (Petroleum ether /EtOAc = 5:1);

**<sup>1</sup>H NMR (400 MHz, CDCl<sub>3</sub>):** δ 7.83 (d, *J* = 8.0 Hz, 1H), 7.52 (t, *J* = 8.0 Hz, 1H), 7.38 – 7.25 (m, 2H), 3.70 (s, 3H), 2.94 (t, *J* = 8.0 Hz, 2H), 1.85 – 1.73 (m, 2H), 1.47 – 1.34 (m, 5H), 0.92 (t, *J* = 4.0 Hz, 3H).

**<sup>13</sup>C NMR (101 MHz, CDCl<sub>3</sub>):** δ 161.4, 154.9, 133.1, 132.7, 129.6, 129.5, 123.5, 113.5, 34.4, 31.8, 29.0, 26.6, 22.5, 14.1.

**HRMS (ESI):** calc'd for C<sub>14</sub>H<sub>18</sub>N<sub>2</sub>O ([M+H]<sup>+</sup>) 231.1497, found 231.1493.

### 3-heptyl-1-methylquinoxalin-2(1H)-one(3ad)

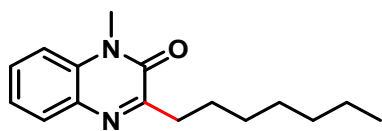

Electrolysis was conducted following the general procedure. The crude material was purified by flash column chromatography (silica gel, 10% EtOAc in petroleum ether) to give **3ad** as a yellow oil (92.0 mg, 71% yield).

**Rf** = 0.50 (Petroleum ether /EtOAc = 5:1);

**<sup>1</sup>H NMR (400 MHz, CDCl<sub>3</sub>):** δ 7.83 (d, *J* = 8.0 Hz, 1H), 7.55 – 7.48 (m, 1H), 7.35 – 7.27 (m, 2H), 3.70 (s, 3H), 2.94 (t, *J* = 8.0 Hz, 2H), 1.85 – 1.75 (m, 2H), 1.48 – 1.34 (m, 4H), 1.33 – 1.28 (m, 4H), 0.88 (t, *J* = 8.0 Hz, 3H).

**<sup>13</sup>C NMR (101 MHz, CDCl<sub>3</sub>):** δ 161.4, 154.9, 133.1, 132.8, 129.6, 129.5, 123.5, 113.6, 34.5, 31.8, 29.6, 29.2, 29.1, 26.9, 22.7, 14.1.

**HRMS (ESI):** calc'd for C<sub>16</sub>H<sub>22</sub>N<sub>2</sub>O ([M+H]<sup>+</sup>) 259.1810, found 259.1805.

### 1-methyl-3-undecylquinoxalin-2(1H)-one(3ae)

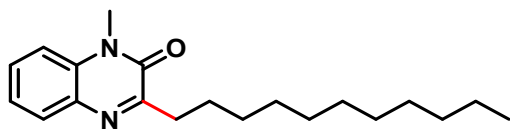

Electrolysis was conducted following the general procedure. The crude material was purified by flash column chromatography (silica gel, 10% EtOAc in petroleum ether) to give **3ae** as a white solid (84.5

mg, 54% yield).

**M. p.** = 58 – 60 °C;

**Rf** = 0.40 (Petroleum ether /EtOAc = 5:1);

**<sup>1</sup>H NMR (400 MHz, CDCl<sub>3</sub>):** δ 7.83 (d, *J* = 8.0 Hz, 1H), 7.52 (t, *J* = 8.0 Hz, 1H), 7.38 – 7.23 (m, 2H), 3.70 (s, 3H), 2.94 (t, *J* = 8.0 Hz, 2H), 1.84 – 1.72 (m, 2H), 1.49 – 1.39 (m, 2H), 1.26 (s, 15H), 0.88 (t, *J* = 4.0 Hz, 3H).

**<sup>13</sup>C NMR (101 MHz, CDCl<sub>3</sub>):** δ 161.4, 154.9, 133.1, 132.7, 129.6, 129.5, 123.5, 113.6, 34.4, 31.9, 29.7, 29.6, 29.6, 29.5, 29.4, 29.0, 26.9, 22.7, 14.2.

**HRMS (ESI):** calc'd for C<sub>20</sub>H<sub>30</sub>N<sub>2</sub>O ([M+H]<sup>+</sup>) 315.2436, found 315.2431.

**1-methyl-5-(4-methyl-3-oxo-3,4-dihydroquinoxalin-2-yl)-pentanoate(3af)**

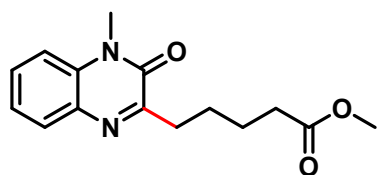

Electrolysis was conducted following the general procedure. The crude material was purified by flash column chromatography (silica gel, 20% EtOAc in petroleum ether) to give **3af** as a white solid (96.6 mg, 70% yield).

**M. p.** = 103 – 105 °C;

**R<sub>f</sub>** = 0.60 (Petroleum ether /EtOAc = 1:1);

**<sup>1</sup>H NMR (400 MHz, CDCl<sub>3</sub>):** δ 7.82 (d, *J* = 7.2 Hz, 1H), 7.57 – 7.49 (m, 1H), 7.38 – 7.26 (m, 3H), 3.70 (s, 3H), 3.67 (s, 3H), 2.97 (s, 3H), 2.40 (s, 3H), 1.96 – 1.74 (m, 6H).

**<sup>13</sup>C NMR (101 MHz, CDCl<sub>3</sub>):** δ 174.1, 160.5, 154.9, 134.3, 133.1, 129.7, 129.6, 123.6, 113.6, 51.5, 33.9, 33.8, 29.1, 26.1, 24.8.

**HRMS (ESI):** calc'd for C<sub>15</sub>H<sub>18</sub>N<sub>2</sub>O<sub>3</sub> ([M+H]<sup>+</sup>) 275.1369, found 275.1389.

**1-methyl-3-(4-phenylbutyl)-quinoxalin-2(1H)-one(3ag)**

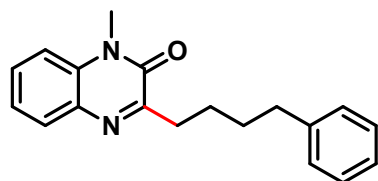

Electrolysis was conducted following the general procedure. The crude material was purified by flash column chromatography (silica gel, 20% EtOAc in petroleum ether) to give **3ag** as a yellow oil (119.6 mg, 82% yield).

**R<sub>f</sub>** = 0.50 (Petroleum ether /EtOAc = 2:1);

**<sup>1</sup>H NMR (400 MHz, CDCl<sub>3</sub>):** δ 7.82 (dd, *J* = 8.0, 1.2 Hz, 1H), 7.55 – 7.48 (m, 1H), 7.36 – 7.31 (m, 1H), 7.31 – 7.23 (m, 3H), 7.22 – 7.13 (m, 3H), 3.70 (s, 3H), 3.05 – 2.94 (m, 2H), 2.74 – 2.65 (m, 2H), 1.90 – 1.73 (m, 4H).

**<sup>13</sup>C NMR (101 MHz, CDCl<sub>3</sub>):** δ 161.1, 154.9, 142.6, 133.1, 132.7, 129.6, 129.6, 128.5, 128.3, 125.6, 123.6, 113.6, 35.8, 34.2, 31.4, 29.1, 26.5.

**HRMS (ESI):** calc'd for C<sub>19</sub>H<sub>20</sub>N<sub>2</sub>O ([M+H]<sup>+</sup>) 293.1654, found 293.1648.

**2-isopropyl-1-methylquinoxalin-2(1H)-one(3ah)**

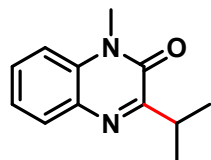

Electrolysis was conducted following the general procedure. The crude material was purified by flash column chromatography (silica gel, 10% EtOAc in petroleum ether) to give **3ah** as a white solid (76.9 mg, 76% yield).

**M. p.** = 106 – 107 °C;

**R<sub>f</sub>** = 0.80 (Petroleum ether /EtOAc = 2:1);

**<sup>1</sup>H NMR (400 MHz, CDCl<sub>3</sub>):** δ 7.85 (d, *J* = 8.0 Hz, 1H), 7.51 (t, *J* = 8.0 Hz, 1H), 7.35 – 7.25 (m, 2H), 3.71 (s, 3H), 3.66 – 3.58 (m, 1H), 1.33 (s, 3H), 1.31 (s, 3H).

**<sup>13</sup>C NMR (101 MHz, CDCl<sub>3</sub>):** δ 165.1, 154.6, 133.1, 132.8, 129.8, 129.5, 123.4, 113.5, 31.2, 29.1, 20.2.

**HRMS (ESI):** calc'd for C<sub>12</sub>H<sub>14</sub>N<sub>2</sub>O ([M+H]<sup>+</sup>) 203.1184, found 203.1180.

### 2-cyclopentyl-1-methylquinoxalin-2(1H)-one(3ai)

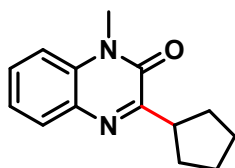

Electrolysis was conducted following the general procedure. The crude material was purified by flash column chromatography (silica gel, 20% EtOAc in petroleum ether) to give **3ai** as a white solid (79.7 mg, 70% yield).

**M. p.** = 89 – 91 °C;

**R<sub>f</sub>** = 0.30 (Petroleum ether /EtOAc = 5:1);

**<sup>1</sup>H NMR (400 MHz, CDCl<sub>3</sub>):** δ 7.82 (d, *J* = 8.0 Hz, 1H), 7.49 (t, *J* = 8.0 Hz, 1H), 7.39 – 7.20 (m, 2H), 3.70 (s, 4H), 2.06 (s, 2H), 1.93 (s, 2H), 1.82 (s, 2H), 1.72 (s, 2H).

**<sup>13</sup>C NMR (101 MHz, CDCl<sub>3</sub>):** δ 163.8, 155.1, 132.9, 132.7, 129.8, 129.3, 113.4, 42.7, 30.9, 29.1, 25.9.

**HRMS (ESI):** calc'd for C<sub>14</sub>H<sub>16</sub>N<sub>2</sub>O ([M+H]<sup>+</sup>) 229.1341, found 229.1337.

### 3-(4,4-difluorocyclohexyl)-1-methylquinoxalin-2(1H)-one(3aj)

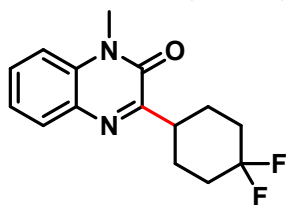

Electrolysis was conducted following the general procedure. The crude material was purified by flash column chromatography (silica gel, 10% EtOAc in petroleum ether) to give **3aj** as a white solid (118.9 mg, 85% yield).

**M. p.** = 181 – 182 °C;

**R<sub>f</sub>** = 0.25 (Petroleum ether /EtOAc = 5:1);

**<sup>1</sup>H NMR (400 MHz, CDCl<sub>3</sub>):** δ 7.84 (d, *J* = 8.0 Hz, 1H), 7.54 (t, *J* = 8.0 Hz, 1H), 7.39 – 7.28 (m, 2H), 3.71 (s, 3H), 3.45 – 3.35 (m, 1H), 2.32 – 2.22 (m, 2H), 2.10 – 1.85 (m, 6H).

**<sup>13</sup>C NMR (101 MHz, CDCl<sub>3</sub>):** δ 161.9, 154.4, 132.9, 132.7, 130.0, 129.9, 123.7, 113.6, 38.4, 33.5 (t, *J* = 88.0 Hz), 29.2, 26.6, 26.5.

**<sup>19</sup>F NMR (377 MHz, CDCl<sub>3</sub>):** δ -91.87 (d, *J* = 235.3 Hz), -101.16 (d, *J* = 232.2 Hz).

**HRMS (ESI):** calc'd for C<sub>15</sub>H<sub>16</sub>F<sub>2</sub>N<sub>2</sub>O ([M+H]<sup>+</sup>) 279.1309, found 279.1305.

### 1-methyl-3-(tetrahydro-2H-pyran-4-yl)-quinoxalin-2(1H)-one(3ak)

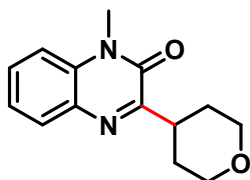

Electrolysis was conducted following the general procedure. The crude material was purified by flash column chromatography (silica gel, 20% EtOAc in petroleum ether) to give **3ak** as a white solid (90.5 mg, 81% yield).

**M. p.** = 175 – 176 °C;

**R<sub>f</sub>** = 0.40 (Petroleum ether /EtOAc = 1:1);

**<sup>1</sup>H NMR (400 MHz, CDCl<sub>3</sub>):** δ 7.86 (dd, *J* = 8.0, 1.2 Hz, 1H), 7.57 – 7.50 (m, 1H), 7.37 – 7.27 (m, 2H), 4.15 – 4.05 (m, 2H), 3.71 (s, 3H), 3.67 – 3.59 (m, 2H), 3.58 – 3.55 (m, 1H), 2.00 – 1.87 (m, 4H).

$^{13}\text{C}$  NMR (101 MHz,  $\text{CDCl}_3$ ):  $\delta$  162.0, 154.5, 132.9, 132.8, 130.0, 129.8, 123.6, 113.5, 67.9, 38.1, 30.1, 29.1.

HRMS (ESI): calc'd for  $\text{C}_{14}\text{H}_{16}\text{N}_2\text{O}_2$  ( $[\text{M}+\text{H}]^+$ ) 245.1290, found 245.1286.

### 1-methyl-3-(pentan-3-yl)-quinoxalin-2(1H)-one(3al)

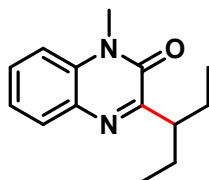

Electrolysis was conducted following the general procedure. The crude material was purified by flash column chromatography (silica gel, 20% EtOAc in petroleum ether) to give **3al** as a yellow oil (86.4 mg, 75% yield).

*Rf* = 0.70 (Petroleum ether /EtOAc = 5:1);

$^1\text{H}$  NMR (400 MHz,  $\text{CDCl}_3$ ):  $\delta$  7.85 (dd,  $J$  = 8.0, 1.4 Hz, 1H), 7.56 – 7.46 (m, 1H), 7.38 – 7.21 (m, 2H), 3.71 (s, 2H), 3.42 – 3.29 (m, 1H), 1.95 – 1.79 (m, 2H), 1.77 – 1.62 (m, 3H), 0.88 (t,  $J$  = 7.4 Hz, 5H).

$^{13}\text{C}$  NMR (101 MHz,  $\text{CDCl}_3$ ):  $\delta$  163.9, 155.1, 132.9, 132.8, 129.9, 129.5, 123.4, 113.5, 44.7, 29.2, 25.8, 12.0.

HRMS (ESI): calc'd for  $\text{C}_{14}\text{H}_{18}\text{N}_2\text{O}$  ( $[\text{M}+\text{H}]^+$ ) 231.1497, found 231.1493.

### 1-methyl-3-(1-methylcyclohexyl)-quinoxalin-2(1H)-one(3am)

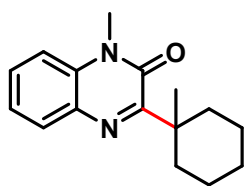

Electrolysis was conducted following the general procedure. The crude material was purified by flash column chromatography (silica gel, 20% EtOAc in petroleum ether) to give **3am** as a white solid (67.2 mg, 52% yield).

*M. p.* = 70 – 71°C;

*Rf* = 0.50 (Petroleum ether /EtOAc = 5:1);

$^1\text{H}$  NMR (400 MHz,  $\text{CDCl}_3$ ):  $\delta$  7.84 (dd,  $J$  = 8.0, 1.2 Hz, 1H), 7.54 – 7.46 (m, 1H), 7.33 – 7.26 (m, 2H), 3.66 (s, 3H), 2.53 – 2.37 (m, 2H), 1.70 – 1.46 (m, 8H), 1.43 (s, 3H).

$^{13}\text{C}$  NMR (101 MHz,  $\text{CDCl}_3$ ):  $\delta$  164.8, 153.8, 133.1, 132.3, 130.1, 129.5, 123.1, 113.3, 42.9, 35.7, 28.8, 26.6, 24.5, 22.9.

HRMS (ESI): calc'd for  $\text{C}_{16}\text{H}_{20}\text{N}_2\text{O}$  ( $[\text{M}+\text{H}]^+$ ) 257.1654, found 257.1647.

### 3-(tert-butyl)-1-methylquinoxalin-2(1H)-one(3an)

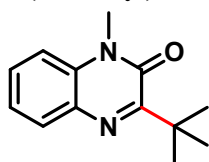

Electrolysis was conducted following the general procedure. The crude material was purified by flash column chromatography (silica gel, 20% EtOAc in petroleum ether) to give **3an** as a white solid (42.7 mg, 40% yield).

*M. p.* = 71 – 72 °C;

*Rf* = 0.40 (Petroleum ether /EtOAc = 10:1);

$^1\text{H}$  NMR (400 MHz,  $\text{CDCl}_3$ ):  $\delta$  7.83 (dd,  $J$  = 8.0, 1.2 Hz, 1H), 7.49 (ddd,  $J$  = 8.4, 8.0, 1.6 Hz, 1H), 7.33 – 7.20 (m, 2H), 3.67 (s, 3H), 1.49 (s, 9H).

$^{13}\text{C}$  NMR (101 MHz,  $\text{CDCl}_3$ ):  $\delta$  165.3, 153.7, 133.3, 132.2, 130.1, 129.5, 123.2, 113.2, 39.5, 28.7, 27.9.

HRMS (ESI): calc'd for  $\text{C}_{13}\text{H}_{16}\text{N}_2\text{O}$  ( $[\text{M}+\text{H}]^+$ ) 217.1341, found 217.1337.

### 3-((1*s*, 3*s*)-adamantan-1-yl)-1-methylquinoxalin-2(1*H*)-one(3ao)

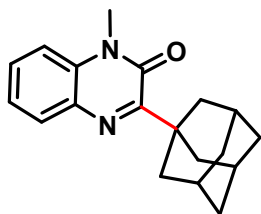

Electrolysis was conducted following the general procedure. The crude material was purified by flash column chromatography (silica gel, 20% EtOAc in petroleum ether) to give **3ao** as a white solid (70.8 mg, 57% yield).

M. p. = 186 – 187 °C;

R<sub>f</sub> = 0.50 (Petroleum ether /EtOAc = 5:1);

$^1\text{H}$  NMR (400 MHz,  $\text{CDCl}_3$ ):  $\delta$  7.83 (dd,  $J$  = 8.0, 1.2 Hz, 1H), 7.54 – 7.44 (m, 1H), 7.36 – 7.21 (m, 2H), 3.66 (s, 3H), 2.24 (d,  $J$  = 2.4 Hz, 6H), 2.11 (s, 3H), 1.86 – 1.77 (m, 6H).

$^{13}\text{C}$  NMR (101 MHz,  $\text{CDCl}_3$ ):  $\delta$  164.8, 153.7, 133.0, 132.5, 132.4, 130.1, 129.5, 123.2, 113.3, 42.0, 38.8, 37.0, 28.7, 28.6.

HRMS (ESI): calc'd for  $\text{C}_{19}\text{H}_{22}\text{N}_2\text{O}$  ( $[\text{M}+\text{H}]^+$ ) 295.1810, found 295.1806.

### *tert*-butyl(*R*)-(2-methyl-1-(4-methyl-3-oxo-3,4-dihydroquinoxalin-2-yl)-propyl)-carbamate(3ap)

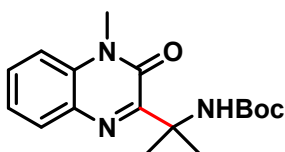

Electrolysis was conducted following the general procedure. The crude material was purified by flash column chromatography (silica gel, 20% EtOAc in petroleum ether) to give **3ap** as a white solid (118.8 mg, 72% yield).

M. p. = 106 – 107 °C;

R<sub>f</sub> = 0.80 (Petroleum ether /EtOAc = 1:1);

$^1\text{H}$  NMR (400 MHz,  $\text{CDCl}_3$ ):  $\delta$  7.87 (dd,  $J$  = 8.0, 1.1 Hz, 1H), 7.59 – 7.50 (m, 1H), 7.38 – 7.27 (m, 2H), 6.17 (s, 1H), 3.68 (s, 3H), 1.83 (s, 6H), 1.43 (s, 9H).

$^{13}\text{C}$  NMR (101 MHz,  $\text{CDCl}_3$ ):  $\delta$  160.3, 154.9, 153.0, 133.6, 131.5, 130.3, 130.9, 123.5, 113.5, 78.9, 57.1, 28.9, 28.4, 25.1.

HRMS (ESI): calc'd for  $\text{C}_{17}\text{H}_{24}\text{N}_3\text{O}_3$  ( $[\text{M}+\text{H}]^+$ ) 318.1818, found 318.1806.

### (5*S*,8*R*,9*S*,10*S*,13*R*,14*S*)-10,13-dimethyl-17-((*R*)-4-(4-methyl-3-oxo-3,4-dihydroquinoxalin-2-yl) butan-2-yl) dodecahydro-3*H*-cyclopenta[*a*]phenanthrene-3,7,12(2*H*, 4*H*)-trione(3aq)

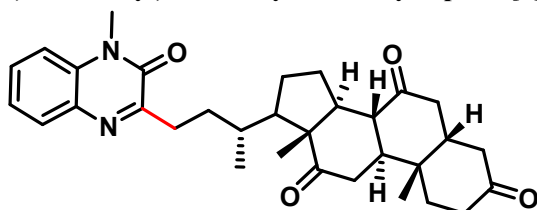

Electrolysis was conducted following the general procedure. The crude material was purified by flash column chromatography (silica gel, 30% EtOAc in petroleum ether) to give **3aq** as a white solid (110.3 mg, 43% yield).

**M. p.** >200 °C;

**R<sub>f</sub>** = 0.30 (Petroleum ether /EtOAc = 1:1);

**<sup>1</sup>H NMR (400 MHz, CDCl<sub>3</sub>):** δ 7.83 (d, *J* = 8.0 Hz, 1H), 7.52 (t, *J* = 7.2 Hz, 1H), 7.36–7.29 (m, 2H), 3.70 (s, 3H), 3.09–2.99 (m, 1H), 2.94–2.87 (m, 4H), 2.35–2.22 (m, 6H), 2.21–2.07 (m, 6H), 2.05–1.96 (m, 4H), 1.89–1.85 (m, 1H), 1.67–1.55 (m, 2H), 1.41 (s, 3H), 1.10 (s, 3H), 0.99 (d, *J* = 6.4 Hz, 3H).

**<sup>13</sup>C NMR (101 MHz, CDCl<sub>3</sub>):** δ 212.0, 209.2, 208.8, 161.5, 154.8, 133.1, 132.7, 129.5, 129.5, 123.5, 113.6, 56.9, 51.7, 49.0, 46.8, 45.8, 45.5, 45.0, 42.8, 38.6, 36.7, 36.2, 36.0, 35.2, 32.3, 31.7, 29.0, 27.7, 25.2, 23.4, 21.9, 18.9, 11.9.

**HRMS (ESI):** calc'd for C<sub>32</sub>H<sub>40</sub>N<sub>2</sub>O<sub>4</sub> ([M+H]<sup>+</sup>) 517.3066, found 517.3059.

### 3-cyclohexyl-1,6-dimethylquinoxalin-2(1H)-one(3ba) and 3-cyclohexyl-1,7-dimethylquinoxalin-2(1H)-one (3ba')

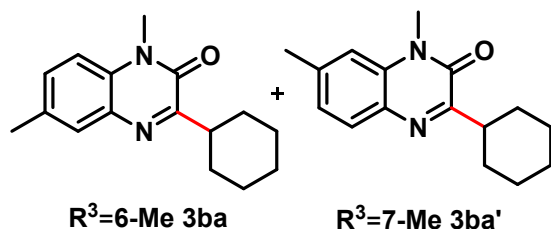

Electrolysis was conducted following the general procedure. The crude material was purified by flash column chromatography (silica gel, 20% EtOAc in petroleum ether) to give **3ba** as a white solid (89.3 mg, 70% yield).

**M. p.** = 98 – 100 °C;

**R<sub>f</sub>** = 0.40 (Petroleum ether /EtOAc = 5:1);

**<sup>1</sup>H NMR (400 MHz, CDCl<sub>3</sub>):** δ 7.70 (d, *J* = 8.1 Hz, 1H), 7.65 (s, 1H), 7.31 (d, *J* = 8.2 Hz, 1H), 7.27 (s, 1H), 7.15 (dd, *J* = 11.6, 8.8 Hz, 2H), 7.06 (s, 1H), 3.67 (s, 6H), 3.38–3.25 (m, 2H), 2.50 (s, 3H), 2.44 (s, 3H), 1.95 (d, *J* = 11.9 Hz, 4H), 1.86 (d, *J* = 12.4 Hz, 4H), 1.76 (d, *J* = 12.5 Hz, 2H), 1.62–1.37 (m, 8H), 1.37–1.24 (m, 2H).

**<sup>13</sup>C NMR (101 MHz, CDCl<sub>3</sub>):** δ 164.2, 163.0, 154.7, 154.5, 140.0, 133.2, 132.8, 132.7, 131.1, 130.6, 130.5, 129.7, 129.4, 124.6, 113.6, 113.2, 40.7, 30.6, 30.5, 29.0, 29.0, 26.3, 26.3, 26.2, 22.0, 20.6.

**HRMS (ESI):** calc'd for C<sub>16</sub>H<sub>20</sub>N<sub>2</sub>O ([M+H]<sup>+</sup>) 257.1654, found 257.1649.

### 6-chloro-3-cyclohexyl-1-methylquinoxalin-2(1H)-one(3ca)

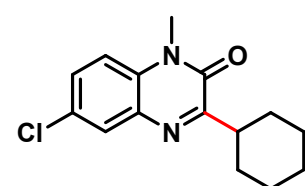

Electrolysis was conducted following the general procedure. The crude material was purified by flash column chromatography (silica gel, 20% EtOAc in petroleum ether) to give **3ca** as a white solid (85.8 mg, 64% yield).

**M. p.** = 125 – 126 °C;

**R<sub>f</sub>** = 0.50 (Petroleum ether /EtOAc = 5:1);

**<sup>1</sup>H NMR (400 MHz, CDCl<sub>3</sub>):** δ 7.74 (d, *J* = 8.8 Hz, 1H), 7.31–7.24 (m, 2H), 3.66 (s, 3H), 3.31 (t, *J* = 10.8 Hz, 1H), 1.94 (d, *J* = 11.6 Hz, 2H), 1.86 (d, *J* = 11.6 Hz, 2H), 1.81–1.68 (m, 1H), 1.62–1.40 (m, 4H), 1.36–1.24 (m, 2H).

**<sup>13</sup>C NMR (101 MHz, CDCl<sub>3</sub>):** δ 164.4, 154.3, 135.2, 133.7, 131.4, 130.8, 123.8, 113.5, 40.8, 30.5,

29.2, 26.3, 26.1.

**HRMS (ESI):** calc'd for C<sub>15</sub>H<sub>17</sub>ClN<sub>2</sub>O ([M+H]<sup>+</sup>) 277.1108, found 277.1103.

### 7-chloro-3-cyclohexyl-1-methylquinoxalin-2(1H)-one(3da)

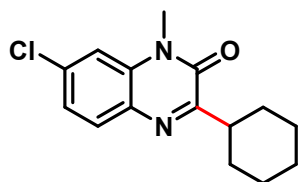

Electrolysis was conducted following the general procedure. The crude material was purified by flash column chromatography (silica gel, 20% EtOAc in petroleum ether) to give **3da** as a white solid (61.1 mg, 46% yield).

**M. p.** = 180 – 182 °C;

**R<sub>f</sub>** = 0.80 (Petroleum ether /EtOAc = 5:1);

**<sup>1</sup>H NMR (400 MHz, CDCl<sub>3</sub>):** δ 7.83 (s, 1H), 7.45 (d, *J* = 8.4 Hz, 1H), 7.21 (d, *J* = 8.8 Hz, 1H), 3.68 (s, 3H), 3.32 (t, *J* = 10.4 Hz, 1H), 1.94 (d, *J* = 11.2 Hz, 2H), 1.86 (d, *J* = 11.2 Hz, 2H), 1.80-1.72 (m, 1H), 1.60-1.40 (m, 4H), 1.34-1.23 (m, 2H).

**<sup>13</sup>C NMR (101 MHz, CDCl<sub>3</sub>):** δ 165.7, 154.2, 133.4, 131.6, 129.3, 129.2, 128.7, 114.6, 40.8, 30.5, 29.3, 26.3, 26.1.

**HRMS (ESI):** calc'd for C<sub>15</sub>H<sub>18</sub>N<sub>2</sub>O ([M+H]<sup>+</sup>) 277.1108, found 277.1103.

### 3-cyclohexyl-6-fluoro-1-methylquinoxalin-2(1H)-one(3ea)

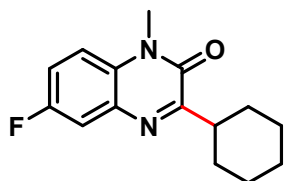

Electrolysis was conducted following the general procedure. The crude material was purified by flash column chromatography (silica gel, 20% EtOAc in petroleum ether) to give **3ea** as a white solid (68.4 mg, 53% yield).

**M. p.** = 112 – 113 °C;

**R<sub>f</sub>** = 0.40 (Petroleum ether /EtOAc = 5:1);

**<sup>1</sup>H NMR (400 MHz, CDCl<sub>3</sub>):** δ 7.56 – 7.49 (m, 1H), 7.29 – 7.20 (m, 2H), 3.69 (s, 3H), 3.38 – 3.28 (m, 1H), 1.94 (d, *J* = 12.3 Hz, 2H), 1.89 – 1.83 (m, 2H), 1.77 (d, *J* = 13.1 Hz, 1H), 1.60 – 1.39 (m, 5H), 1.35 – 1.23 (m, 1H).

**<sup>13</sup>C NMR (101 MHz, CDCl<sub>3</sub>):** δ 165.8, 159.8, 157.4, 154.2, 133.5 (d, *J* = 11.3 Hz), 129.5 (d, *J* = 2.1 Hz), 117.0 (d, *J* = 23.8 Hz), 115.2 (d, *J* = 22.4 Hz), 114.5 (d, *J* = 8.8 Hz), 40.8, 30.5, 29.3, 26.2, 26.1.

**<sup>19</sup>F NMR (377 MHz, CDCl<sub>3</sub>):** δ -117.45 – -121.07 (m).

**HRMS (ESI):** calc'd for C<sub>15</sub>H<sub>17</sub>FN<sub>2</sub>O ([M+H]<sup>+</sup>) 261.1403, found 261.1398.

### 1-cyclohexyl-1-methyl-2-oxo-1,2-dihydroquinoxaline-6-carbonitrile(3fa)

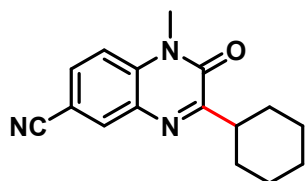

Electrolysis was conducted following the general procedure. The crude material was purified by flash column chromatography (silica gel, 20% EtOAc in petroleum ether) to give **3fa** as a white solid (100.0 mg, 75% yield).



**M. p.** = 140 – 141 °C;

**R<sub>f</sub>** = 0.40 (Petroleum ether /EtOAc = 5:1);

**<sup>1</sup>H NMR (400 MHz, CDCl<sub>3</sub>):** δ 7.91 (d, *J* = 7.6 Hz, 1H), 7.58 (s, 2H), 3.70 (s, 3H), 3.39 – 3.30 (m, 1H), 1.95 (d, *J* = 12.0 Hz, 2H), 1.87 (d, *J* = 12.0 Hz, 2H), 1.80 – 1.71 (m, 1H), 1.61 – 1.39 (m, 4H), 1.35 – 1.24 (m, 1H).

**<sup>13</sup>C NMR (101 MHz, CDCl<sub>3</sub>):** δ 167.9, 154.0, 135.1, 133.3, 130.7, 126.4, 118.3, 117.7, 112.4, 41.1, 30.4, 29.3, 26.2, 26.0.

**HRMS (ESI):** calc'd for C<sub>16</sub>H<sub>18</sub>N<sub>3</sub>O ([M+H]<sup>+</sup>) 268.1450, found 268.1445.

### 1-cyclohexyl-1-methyl-6-(trifluoromethyl)-quinoxalin-2(1H)-one(3ga)

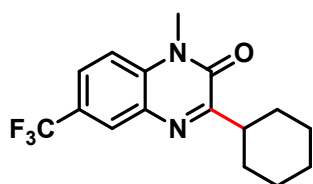

Electrolysis was conducted following the general procedure. The crude material was purified by flash column chromatography (silica gel, 20% EtOAc in petroleum ether) to give **3ga** as a white solid (85.7 mg, 55% yield).

**M. p.** = 98 – 101 °C;

**R<sub>f</sub>** = 0.50 (Petroleum ether /EtOAc = 5:1);

**<sup>1</sup>H NMR (400 MHz, CDCl<sub>3</sub>):** δ 8.13 (s, 1H), 7.72 (d, *J* = 8.4 Hz, 1H), 7.38 (d, *J* = 8.4 Hz, 1H), 3.72 (s, 3H), 3.34 (t, *J* = 10.6 Hz, 1H), 1.95 (d, *J* = 11.4 Hz, 2H), 1.88 (d, *J* = 11.4 Hz, 2H), 1.78 (d, *J* = 12.0 Hz, 1H), 1.62 – 1.42 (m, 4H), 1.38 – 1.23 (m, 1H).

**<sup>13</sup>C NMR (101 MHz, CDCl<sub>3</sub>):** δ 256.0, 243.5, 166.0, 154.3, 135.2, 132.2, 127.2 (q, *J* = 3.4 Hz), 125.7 (q, *J* = 7.0, 3.6 Hz), 125.5 (t, *J* = 31.8 Hz), 122.5, 114.1, 40.8, 30.5, 29.3, 26.2, 26.1.

**<sup>19</sup>F NMR (377 MHz, CDCl<sub>3</sub>):** δ -61.89 (s).

**HRMS (ESI):** calc'd for C<sub>16</sub>H<sub>17</sub>F<sub>3</sub>N<sub>2</sub>O ([M+H]<sup>+</sup>) 311.1371, found 311.1368.

### 1-cyclohexyl-6-methoxy-1-methylquinoxalin-2(1H)-one(3ha)

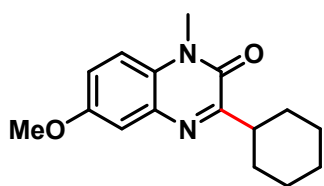

Electrolysis was conducted following the general procedure. The crude material was purified by flash column chromatography (silica gel, 10% EtOAc in petroleum ether) to give **3ha** as a white solid (73.2 mg, 54% yield).

**M. p.** = 105 – 106 °C;

**R<sub>f</sub>** = 0.40 (Petroleum ether /EtOAc = 5:1);

**<sup>1</sup>H NMR (400 MHz, CDCl<sub>3</sub>):** δ 7.74 (d, *J* = 8.8 Hz, 1H), 7.27 (s, 1H), 6.90 (dd, *J* = 8.8, 2.4 Hz, 1H), 6.69 (d, *J* = 2.4 Hz, 1H), 3.91 (s, 3H), 3.65 (s, 3H), 3.34 – 3.23 (m, 1H), 1.94 (d, *J* = 12.0 Hz, 3H), 1.86 (d, *J* = 12.0 Hz, 2H), 1.79 – 1.66 (m, 2H), 1.61 – 1.41 (m, 4H), 1.36 – 1.23 (m, 1H).

**<sup>13</sup>C NMR (101 MHz, CDCl<sub>3</sub>):** δ 160.9, 160.6, 154.9, 134.3, 131.0, 127.8, 110.2, 98.0, 55.8, 40.6, 30.60, 29.11, 26.40, 26.22.

**HRMS (ESI):** calc'd for C<sub>16</sub>H<sub>20</sub>N<sub>2</sub>O<sub>2</sub> ([M+H]<sup>+</sup>) 273.1603, found 273.1595.

### 1-cyclohexyl-1, 6, 7-trimethylquinoxalin-2(1H)-one(3ia)

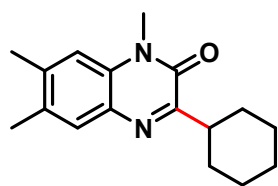

Electrolysis was conducted following the general procedure. The crude material was purified by flash column chromatography (silica gel, 20% EtOAc in petroleum ether) to give **3ia** as a white solid (102.2 mg, 76% yield).

**M. p.** = 111 – 112 °C;

**R<sub>f</sub>** = 0.40 (Petroleum ether /EtOAc = 5:1);

**<sup>1</sup>H NMR (400 MHz, CDCl<sub>3</sub>):** δ 7.59 (s, 1H), 7.03 (s, 1H), 3.66 (s, 3H), 3.36 – 3.23 (m, 1H), 2.40 (s, 3H), 2.33 (s, 3H), 1.94 (d, *J* = 12.8 Hz, 2H), 1.86 (d, *J* = 9.6 Hz, 2H), 1.76 (d, *J* = 12.8 Hz, 1H), 1.62 – 1.40 (m, 4H), 1.36 – 1.21 (m, 1H).

**<sup>13</sup>C NMR (101 MHz, CDCl<sub>3</sub>):** δ 163.0, 154.6, 139.0, 132.2, 131.3, 130.8, 129.9, 114.1, 40.6, 30.6, 29.0, 26.4, 26.2, 20.5, 19.1.

**HRMS (ESI):** calc'd for C<sub>17</sub>H<sub>22</sub>N<sub>2</sub>O ([M+H]<sup>+</sup>) 271.1801, found 271.1803.

### 6,7-dichloro-3-cyclohexyl-1-methylquinoxalin-2(1H)-one(3ja)

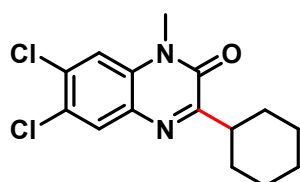

Electrolysis was conducted following the general procedure. The crude material was purified by flash column chromatography (silica gel, 20% EtOAc in petroleum ether) to give **3ja** as a white solid (78.0 mg, 50% yield).

**M. p.** = 123 – 124 °C;

**R<sub>f</sub>** = 0.70 (Petroleum ether /EtOAc = 5:1);

**<sup>1</sup>H NMR (400 MHz, CDCl<sub>3</sub>):** δ 7.91 (s, 1H), 7.35 (s, 1H), 3.65 (s, 3H), 3.30 (t, *J* = 10.7 Hz, 1H), 1.93 (d, *J* = 11.0 Hz, 2H), 1.86 (d, *J* = 11.9 Hz, 2H), 1.80 – 1.67 (m, 2H), 1.58 – 1.38 (m, 5H), 1.35 – 1.22 (m, 2H).

**<sup>13</sup>C NMR (101 MHz, CDCl<sub>3</sub>):** δ 165.9, 153.9, 133.3, 132.3, 132.0, 130.6, 127.1, 115.0, 40.9, 30.5, 29.3, 26.2, 26.1.

**HRMS (ESI):** calc'd for C<sub>15</sub>H<sub>16</sub>Cl<sub>2</sub>N<sub>2</sub>O ([M+H]<sup>+</sup>) 311.0718, found 311.0712.

### 1-cyclohexyl-6, 7-difluoro-1-methylquinoxalin-2(1H)-one(3ka)

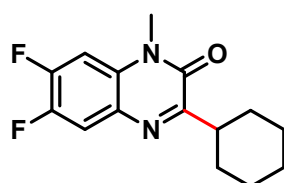

Electrolysis was conducted following the general procedure. The crude material was purified by flash column chromatography (silica gel, 10% EtOAc in petroleum ether) to give **3ka** as a white solid (59.0 mg, 43% yield).

**M. p.** = 176 – 178 °C;

**R<sub>f</sub>** = 0.65 (Petroleum ether /EtOAc = 5:1);

**<sup>1</sup>H NMR (400 MHz, CDCl<sub>3</sub>):** δ 7.64 (q, *J* = 10.4, 8.3 Hz, 1H), 7.08 (q, *J* = 11.4, 7.1 Hz, 1H), 3.65 (s, 3H), 3.34 – 3.25 (m, 1H), 1.93 (d, *J* = 11.8 Hz, 2H), 1.86 (d, *J* = 12.4 Hz, 2H), 1.76 (d, *J* = 12.8 Hz, 1H), 1.58 – 1.39 (m, 5H), 1.37 – 1.22 (m, 2H).

<sup>13</sup>C NMR (101 MHz, CDCl<sub>3</sub>): δ 164.8 (d, *J* = 3.4 Hz), 154.1, 150.9 (dd, *J* = 252.0, 14.2 Hz), 146.5 (dd, *J* = 246.3, 13.9 Hz), 130.0 (dd, *J* = 8.7, 1.8 Hz), 129.2 (dd, *J* = 9.4, 2.8 Hz), 117.4 (dd, *J* = 17.9, 2.1 Hz), 102.1 (d, *J* = 23.0 Hz), 40.8, 30.5, 29.6, 26.2, 26.1.

<sup>19</sup>F NMR (377 MHz, CDCl<sub>3</sub>): δ -130.90 – -136.79 (m), -141.91 – -144.83 (m).

HRMS (ESI): calc'd for C<sub>15</sub>H<sub>16</sub>F<sub>2</sub>N<sub>2</sub>O ([M+H]<sup>+</sup>) 279.1309, found 279.1303.

### 3-cyclohexyl-1-propylquinoxalin-2(1H)-one(3la)

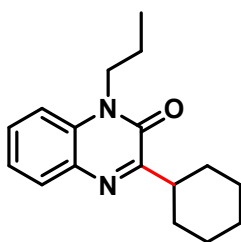

Electrolysis was conducted following the general procedure. The crude material was purified by flash column chromatography (silica gel, 20% EtOAc in petroleum ether) to give **3la** as a white solid (89.9 mg, 67% yield).

M. p. = 103 – 104 °C;

R<sub>f</sub> = 0.80 (Petroleum ether /EtOAc = 5:1);

<sup>1</sup>H NMR (400 MHz, CDCl<sub>3</sub>): δ 7.84 (dd, *J* = 8.0, 1.2 Hz, 1H), 7.53 – 7.43 (m, 1H), 7.29 (dd, *J* = 13.2, 7.5 Hz, 2H), 4.25 – 4.14 (m, 2H), 3.39 – 3.29 (m, 1H), 1.96 (d, *J* = 11.6 Hz, 2H), 1.90 – 1.84 (m, 2H), 1.83 – 1.74 (m, 4H), 1.63 – 1.41 (m, 4H), 1.36 – 1.24 (m, 1H), 1.05 (t, *J* = 7.4 Hz, 3H).

<sup>13</sup>C NMR (101 MHz, CDCl<sub>3</sub>): δ 164.3, 154.3, 133.2, 132.0, 130.0, 129.3, 123.2, 113.5, 43.8, 40.7, 30.5, 26.4, 26.2, 20.7, 11.4.

HRMS (ESI): calc'd for C<sub>15</sub>H<sub>18</sub>N<sub>2</sub>O ([M+H]<sup>+</sup>) 271.1801, found 271.1800.

### 1-benzyl-3-cyclohexylquinoxalin-2(1H)-one(3ma)

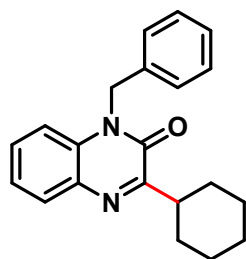

Electrolysis was conducted following the general procedure. The crude material was purified by flash column chromatography (silica gel, 10% EtOAc in petroleum ether) to give **3ma** as a white solid (89.0 mg, 56% yield)

M. p. = 133 – 134 °C;

R<sub>f</sub> = 0.40 (Petroleum ether /EtOAc = 5:1);

<sup>1</sup>H NMR (400 MHz, CDCl<sub>3</sub>): δ 7.84 (d, *J* = 6.4 Hz, 1H), 7.36 (d, *J* = 6.4 Hz, 1H), 7.34 – 7.17 (m, 7H), 5.49 (s, 2H), 3.49 – 3.31 (m, 1H), 2.01 (d, *J* = 10.4 Hz, 2H), 1.88 (d, *J* = 9.6 Hz, 2H), 1.82 – 1.70 (m, 1H), 1.67 – 1.40 (m, 5H), 1.40 – 1.21 (m, 2H).

<sup>13</sup>C NMR (101 MHz, CDCl<sub>3</sub>): δ 164.4, 154.6, 135.5, 133.2, 132.2, 129.9, 129.4, 128.9, 127.6, 126.9, 123.5, 114.3, 45.9, 40.8, 30.6, 26.4, 26.2.

HRMS (ESI): calc'd for C<sub>21</sub>H<sub>22</sub>N<sub>2</sub>O ([M+H]<sup>+</sup>) 319.1810, found 319.1803.

### ethyl 2-(3-cyclohexyl-2-oxoquinoxalin-1(2H)-yl)-acetate(3na)

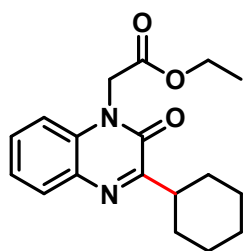

Electrolysis was conducted following the general procedure. The crude material was purified by flash column chromatography (silica gel, 20% EtOAc in petroleum ether) to give **3na** as a white solid (135.2 mg, 86% yield).

**M. p.** = 84 – 85 °C;

**R<sub>f</sub>** = 0.40 (Petroleum ether /EtOAc = 5:1);

**<sup>1</sup>H NMR (400 MHz, CDCl<sub>3</sub>):** δ 7.85 (d, *J* = 8.2 Hz, 1H), 7.46 (t, *J* = 7.6 Hz, 1H), 7.32 (t, *J* = 7.6 Hz, 1H), 7.05 (d, *J* = 8.2 Hz, 1H), 5.01 (s, 2H), 4.25 (q, *J* = 13.6, 6.8 Hz, 2H), 3.32 (t, *J* = 11.2 Hz, 1H), 1.97 (d, *J* = 11.8 Hz, 2H), 1.87 (d, *J* = 12.0 Hz, 2H), 1.77 (d, *J* = 15.9 Hz, 1H), 1.64 – 1.38 (m, 5H), 1.37 – 1.30 (m, 1H), 1.27 (t, *J* = 6.8 Hz, 3H).

**<sup>13</sup>C NMR (101 MHz, CDCl<sub>3</sub>):** δ 167.3, 164.0, 154.1, 133.0, 132.0, 130.1, 129.6, 123.7, 112.9, 62.0, 43.6, 40.8, 30.5, 26.3, 26.2, 14.1.

**HRMS (ESI):** calc'd for C<sub>18</sub>H<sub>22</sub>N<sub>2</sub>O<sub>3</sub> ([M+H]<sup>+</sup>) 315.1709, found 315.1704.

### 1-allyl-3-cyclohexylquinoxalin-2(1H)-one(3oa)

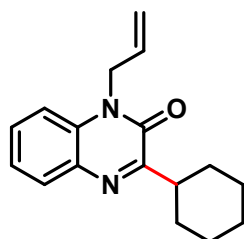

Electrolysis was conducted following the general procedure. The crude material was purified by flash column chromatography (silica gel, 20% EtOAc in petroleum ether) to give **3oa** as a white solid (87.3 mg, 65% yield).

**M. p.** = 91 – 92 °C;

**R<sub>f</sub>** = 0.50 (Petroleum ether /EtOAc = 5:1);

**<sup>1</sup>H NMR (400 MHz, CDCl<sub>3</sub>):** δ 7.84 (d, *J* = 7.6 Hz, 1H), 7.46 (t, *J* = 7.6 Hz, 1H), 7.35 – 7.21 (m, 2H), 6.00 – 5.81 (m, 1H), 5.26 (d, *J* = 10.4 Hz, 1H), 5.17 (d, *J* = 17.2 Hz, 1H), 4.90 (d, *J* = 2.8 Hz, 2H), 3.35 (t, *J* = 11.2 Hz, 1H), 1.97 (d, *J* = 11.2 Hz, 2H), 1.87 (d, *J* = 11.2 Hz, 2H), 1.80 – 1.70 (m, 1H), 1.65 – 1.40 (m, 5H), 1.38 – 1.25 (m, 1H).

**<sup>13</sup>C NMR (101 MHz, CDCl<sub>3</sub>):** δ 164.3, 154.0, 133.0, 132.0, 130.8, 129.8, 129.3, 123.4, 118.0, 114.0, 44.5, 40.7, 30.5, 26.3, 26.1.

**HRMS (ESI):** calc'd for C<sub>15</sub>H<sub>18</sub>N<sub>2</sub>O ([M+H]<sup>+</sup>) 269.1654, found 269.1650.

### 2-cyclohexyl-1-(prop-2-yn-1-yl)-quinoxalin-2(1H)-one(3pa)

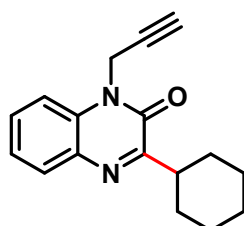

Electrolysis was conducted following the general procedure. The crude material was purified by flash column chromatography (silica gel, 10% EtOAc in petroleum ether) to give **3pa** as a white solid (84.0 mg, 63% yield).

**M. p.** = 148 – 149 °C;

**R<sub>f</sub>** = 0.70 (Petroleum ether /EtOAc = 5:1);

**<sup>1</sup>H NMR (400 MHz, CDCl<sub>3</sub>):** δ 7.85 (d, *J* = 7.9 Hz, 1H), 7.53 (t, *J* = 7.7 Hz, 1H), 7.43 (d, *J* = 8.1 Hz, 1H), 7.34 (t, *J* = 7.6 Hz, 1H), 5.05 (d, *J* = 2.4 Hz, 2H), 3.39 – 3.26 (m, 1H), 2.29 (t, *J* = 2.4 Hz, 1H), 1.96 (d, *J* = 11.8 Hz, 2H), 1.86 (d, *J* = 12.7 Hz, 2H), 1.76 (d, *J* = 12.7 Hz, 1H), 1.62 – 1.40 (m, 4H), 1.37 – 1.25 (m, 1H).

**<sup>13</sup>C NMR (101 MHz, CDCl<sub>3</sub>):** δ 164.2, 153.5, 133.1, 131.3, 129.9, 129.5, 123.8, 114.0, 73.1, 40.8, 31.5, 30.5, 26.3, 26.1.

**HRMS (ESI):** calc'd for C<sub>17</sub>H<sub>18</sub>N<sub>2</sub>O ([M+H]<sup>+</sup>) 267.1497, found 267.1491.

### *tert*-butyl 4-(3-oxo-3,4-dihydroquinoxalin-2-yl)-piperidine-1-carboxylate(**3qa**)

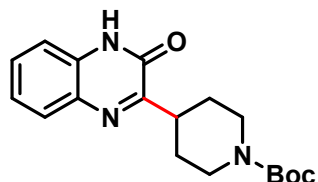

Electrolysis was conducted following the general procedure. The crude material was purified by flash column chromatography (silica gel, 30% EtOAc in petroleum ether) to give **3qa** as a white solid (136.0 mg, 83% yield).

**M. p.** >200 °C;

**R<sub>f</sub>** = 0.30 (Petroleum ether /EtOAc = 1:1);

**<sup>1</sup>H NMR (400 MHz, CDCl<sub>3</sub>):** δ 11.68 (s, 1H), 7.83 (d, *J* = 7.9 Hz, 1H), 7.50 (t, *J* = 7.4 Hz, 1H), 7.38 – 7.29 (m, 2H), 4.28 (s, 2H), 3.49 (t, *J* = 11.5 Hz, 1H), 2.95 (s, 2H), 2.03 – 1.92 (m, 2H), 1.89 – 1.76 (m, 2H), 1.49 (s, 9H).

**<sup>13</sup>C NMR (101 MHz, CDCl<sub>3</sub>):** δ 162.8, 155.9, 154.9, 132.9, 130.7, 129.9, 129.1, 124.2, 115.5, 79.5, 38.5, 29.4, 28.6, 28.5.

**HRMS (ESI):** calc'd for C<sub>18</sub>H<sub>23</sub>N<sub>3</sub>O<sub>3</sub> ([M+Na]<sup>+</sup>) 352.1637, found 352.1630.

## 11. X-ray Crystallography

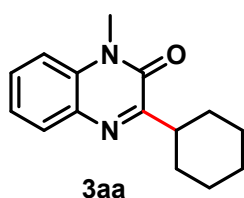

≡

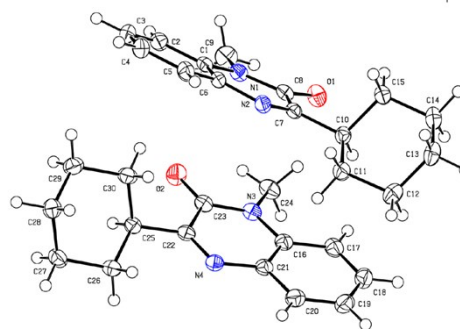

**CCDC 2009783**

**Table 1 Crystal data and structure refinement for r20200612d.**

Identification code

r20200612d

|                                             |                                                               |
|---------------------------------------------|---------------------------------------------------------------|
| Empirical formula                           | C <sub>15</sub> H <sub>18</sub> N <sub>2</sub> O              |
| Formula weight                              | 242.31                                                        |
| Temperature/K                               | 113.15                                                        |
| Crystal system                              | triclinic                                                     |
| Space group                                 | P-1                                                           |
| a/Å                                         | 10.3988(9)                                                    |
| b/Å                                         | 11.9760(9)                                                    |
| c/Å                                         | 12.1316(8)                                                    |
| α/°                                         | 86.151(6)                                                     |
| β/°                                         | 70.363(7)                                                     |
| γ/°                                         | 65.045(8)                                                     |
| Volume/Å <sup>3</sup>                       | 1285.17(19)                                                   |
| Z                                           | 4                                                             |
| ρ <sub>calc</sub> /cm <sup>3</sup>          | 1.252                                                         |
| μ/mm <sup>-1</sup>                          | 0.080                                                         |
| F(000)                                      | 520.0                                                         |
| Crystal size/mm <sup>3</sup>                | 0.2 × 0.18 × 0.16                                             |
| Radiation                                   | MoKα (λ = 0.71073)                                            |
| 2θ range for data collection/°              | 3.578 to 52.734                                               |
| Index ranges                                | -12 ≤ h ≤ 12, -14 ≤ k ≤ 14, -15 ≤ l ≤ 15                      |
| Reflections collected                       | 13407                                                         |
| Independent reflections                     | 5209 [R <sub>int</sub> = 0.0265, R <sub>sigma</sub> = 0.0300] |
| Data/restraints/parameters                  | 5209/0/327                                                    |
| Goodness-of-fit on F <sup>2</sup>           | 1.027                                                         |
| Final R indexes [I ≥ 2σ (I)]                | R <sub>1</sub> = 0.0433, wR <sub>2</sub> = 0.1099             |
| Final R indexes [all data]                  | R <sub>1</sub> = 0.0521, wR <sub>2</sub> = 0.1162             |
| Largest diff. peak/hole / e Å <sup>-3</sup> | 0.63/-0.23                                                    |

**Table 2 Fractional Atomic Coordinates (×10<sup>4</sup>) and Equivalent Isotropic Displacement Parameters (Å<sup>2</sup>×10<sup>3</sup>) for r20200612d. U<sub>eq</sub> is defined as 1/3 of the trace of the orthogonalised U<sub>ij</sub> tensor.**

| Atom | x          | y          | z          | U(eq)   |
|------|------------|------------|------------|---------|
| O1   | 8948.8(10) | 1484.4(9)  | 5996.9(8)  | 29.3(2) |
| N1   | 6988.4(12) | 3406.3(10) | 6499.7(9)  | 23.1(2) |
| N2   | 5896.1(12) | 2620.5(10) | 8704.5(9)  | 22.2(2) |
| C1   | 5732.8(14) | 4255.7(12) | 7366.8(12) | 22.6(3) |
| C2   | 4985.0(16) | 5490.4(13) | 7174.2(13) | 29.5(3) |
| C3   | 3768.0(16) | 6292.2(13) | 8077.1(15) | 34.2(3) |
| C4   | 3271.6(16) | 5897.3(13) | 9179.3(14) | 32.3(3) |
| C5   | 3994.0(15) | 4678.1(13) | 9370.1(12) | 27.7(3) |
| C6   | 5223.3(14) | 3845.3(12) | 8472.9(11) | 21.7(3) |

|     |             |             |            |         |
|-----|-------------|-------------|------------|---------|
| C7  | 7067.9(14)  | 1851.3(12)  | 7891.1(11) | 20.2(3) |
| C8  | 7762.9(14)  | 2213.1(12)  | 6721.2(11) | 21.6(3) |
| C9  | 7555.1(17)  | 3803.5(14)  | 5335.3(12) | 33.0(3) |
| C10 | 7850.9(14)  | 529.5(12)   | 8126.9(11) | 21.9(3) |
| C11 | 6794.7(15)  | 87.4(13)    | 9062.1(13) | 28.1(3) |
| C12 | 7651.2(17)  | -1245.2(13) | 9303.1(14) | 33.8(3) |
| C13 | 8984.2(16)  | -1393.1(13) | 9653.6(12) | 30.5(3) |
| C14 | 10032.0(15) | -951.0(13)  | 8726.4(12) | 29.1(3) |
| C15 | 9186.1(14)  | 382.8(12)   | 8495.0(12) | 24.2(3) |
| O2  | 4849.5(11)  | 3002.3(9)   | 5089.2(8)  | 30.8(2) |
| N3  | 6153.9(12)  | 967.6(10)   | 5294.8(9)  | 22.3(2) |
| N4  | 3511.1(12)  | 1067.2(10)  | 7034.9(9)  | 21.7(2) |
| C16 | 6198.0(14)  | -67.8(12)   | 5908.6(11) | 22.1(3) |
| C17 | 7527.3(15)  | -1156.2(13) | 5686.6(12) | 27.0(3) |
| C18 | 7501.5(17)  | -2152.3(13) | 6325.4(13) | 31.9(3) |
| C19 | 6180.7(17)  | -2092.0(13) | 7186.7(13) | 31.9(3) |
| C20 | 4875.1(16)  | -1021.9(13) | 7405.1(12) | 27.2(3) |
| C21 | 4859.9(14)  | 5.2(12)     | 6775.5(11) | 21.9(3) |
| C22 | 3508.3(14)  | 2030.9(12)  | 6486.9(11) | 20.4(3) |
| C23 | 4874.0(14)  | 2062.5(12)  | 5573.3(11) | 22.1(3) |
| C24 | 7483.7(15)  | 885.7(14)   | 4294.7(12) | 28.3(3) |
| C25 | 2092.1(14)  | 3215.7(12)  | 6762.1(11) | 21.2(3) |
| C26 | 651.0(14)   | 3030.4(12)  | 7337.9(11) | 23.8(3) |
| C27 | -745.7(15)  | 4266.6(13)  | 7609.2(12) | 28.0(3) |
| C28 | -669.2(15)  | 5180.3(13)  | 8377.5(13) | 29.3(3) |
| C29 | 769.0(15)   | 5358.5(13)  | 7816.1(14) | 31.7(3) |
| C30 | 2164.1(15)  | 4125.7(12)  | 7550.6(12) | 27.5(3) |

**Table 3 Anisotropic Displacement Parameters ( $\text{\AA}^2 \times 10^3$ ) for r20200612d. The Anisotropic displacement factor exponent takes the form:  $-2\pi^2[h^2a^{*2}U_{11}+2hka^*b^*U_{12}+\dots]$ .**

| Atom | $U_{11}$ | $U_{22}$ | $U_{33}$ | $U_{23}$ | $U_{13}$ | $U_{12}$ |
|------|----------|----------|----------|----------|----------|----------|
| O1   | 23.8(5)  | 34.6(6)  | 23.1(5)  | -0.8(4)  | -5.5(4)  | -8.1(4)  |
| N1   | 22.5(5)  | 28.3(6)  | 22.4(5)  | 8.2(5)   | -9.0(4)  | -14.2(5) |
| N2   | 19.9(5)  | 22.9(6)  | 24.0(5)  | 3.7(4)   | -8.8(4)  | -8.3(4)  |
| C1   | 18.7(6)  | 24.4(7)  | 29.9(7)  | 5.9(5)   | -11.6(5) | -11.8(5) |
| C2   | 27.4(7)  | 27.6(7)  | 41.1(8)  | 14.3(6)  | -16.9(6) | -16.1(6) |
| C3   | 27.6(7)  | 21.1(7)  | 57.5(10) | 9.8(7)   | -20.8(7) | -9.7(6)  |
| C4   | 22.5(7)  | 24.8(7)  | 45.8(9)  | -1.8(6)  | -11.8(6) | -5.8(6)  |
| C5   | 20.3(6)  | 27.8(7)  | 32.0(7)  | 2.3(6)   | -8.3(6)  | -8.0(6)  |
| C6   | 18.4(6)  | 21.7(6)  | 27.2(7)  | 4.8(5)   | -10.7(5) | -8.7(5)  |

|     |         |         |         |         |          |          |
|-----|---------|---------|---------|---------|----------|----------|
| C7  | 19.5(6) | 22.6(6) | 22.0(6) | 3.0(5)  | -10.1(5) | -9.9(5)  |
| C8  | 19.8(6) | 27.2(7) | 21.8(6) | 2.4(5)  | -9.8(5)  | -11.7(5) |
| C9  | 36.7(8) | 40.4(8) | 25.9(7) | 13.9(6) | -10.1(6) | -22.0(7) |
| C10 | 22.9(6) | 20.6(6) | 21.5(6) | 1.5(5)  | -10.2(5) | -6.7(5)  |
| C11 | 26.1(7) | 25.2(7) | 36.0(7) | 9.0(6)  | -13.7(6) | -12.1(6) |
| C12 | 38.0(8) | 24.9(7) | 39.8(8) | 9.7(6)  | -15.3(7) | -14.0(6) |
| C13 | 34.0(7) | 23.3(7) | 25.9(7) | 4.0(5)  | -12.1(6) | -3.4(6)  |
| C14 | 25.0(7) | 28.1(7) | 27.8(7) | 0.4(6)  | -12.0(6) | -2.8(6)  |
| C15 | 21.6(6) | 24.9(7) | 24.8(6) | 1.5(5)  | -9.5(5)  | -7.2(5)  |
| O2  | 28.8(5) | 30.9(5) | 30.4(5) | 11.0(4) | -6.1(4)  | -14.6(4) |
| N3  | 20.6(5) | 27.7(6) | 18.1(5) | 0.2(4)  | -3.7(4)  | -11.7(5) |
| N4  | 22.7(5) | 23.5(6) | 20.3(5) | 0.9(4)  | -6.9(4)  | -11.3(5) |
| C16 | 25.1(6) | 24.5(7) | 19.7(6) | -1.1(5) | -9.9(5)  | -11.1(5) |
| C17 | 24.5(7) | 29.6(7) | 25.8(7) | -4.6(6) | -9.2(5)  | -9.0(6)  |
| C18 | 30.8(7) | 24.7(7) | 38.9(8) | -2.6(6) | -17.0(6) | -5.9(6)  |
| C19 | 39.4(8) | 24.4(7) | 38.8(8) | 7.2(6)  | -20.9(7) | -14.6(6) |
| C20 | 30.8(7) | 27.9(7) | 27.6(7) | 4.8(6)  | -11.7(6) | -15.7(6) |
| C21 | 23.9(6) | 23.4(7) | 21.0(6) | -0.1(5) | -9.4(5)  | -10.8(5) |
| C22 | 21.8(6) | 24.5(7) | 17.8(6) | 0.2(5)  | -7.1(5)  | -11.9(5) |
| C23 | 22.3(6) | 27.2(7) | 18.7(6) | 1.7(5)  | -7.2(5)  | -11.9(5) |
| C24 | 21.2(6) | 38.3(8) | 22.7(6) | -0.9(6) | -1.4(5)  | -14.5(6) |
| C25 | 20.2(6) | 23.1(6) | 21.1(6) | 2.4(5)  | -6.7(5)  | -10.2(5) |
| C26 | 22.6(6) | 26.5(7) | 24.2(6) | -0.8(5) | -6.5(5)  | -12.8(6) |
| C27 | 20.2(6) | 32.3(7) | 31.8(7) | 0.7(6)  | -8.5(5)  | -11.4(6) |
| C28 | 21.7(7) | 26.1(7) | 34.5(7) | -2.1(6) | -5.5(6)  | -7.6(6)  |
| C29 | 26.7(7) | 24.3(7) | 42.3(8) | -4.3(6) | -7.0(6)  | -11.8(6) |
| C30 | 22.6(7) | 27.5(7) | 34.2(7) | -3.3(6) | -8.4(6)  | -12.3(6) |

**Table 4 Bond Lengths for r20200612d.**

| Atom | Atom | Length/Å   | Atom | Atom | Length/Å   |
|------|------|------------|------|------|------------|
| O1   | C8   | 1.2333(16) | O2   | C23  | 1.2286(16) |
| N1   | C1   | 1.3949(17) | N3   | C16  | 1.3947(17) |
| N1   | C8   | 1.3732(17) | N3   | C23  | 1.3746(17) |
| N1   | C9   | 1.4683(16) | N3   | C24  | 1.4724(16) |
| N2   | C6   | 1.3896(16) | N4   | C21  | 1.3913(16) |
| N2   | C7   | 1.2938(16) | N4   | C22  | 1.2922(16) |
| C1   | C2   | 1.3968(19) | C16  | C17  | 1.3996(19) |
| C1   | C6   | 1.4058(18) | C16  | C21  | 1.4057(18) |



|     |     |            |     |     |            |
|-----|-----|------------|-----|-----|------------|
| C2  | C3  | 1.381(2)   | C17 | C18 | 1.383(2)   |
| C3  | C4  | 1.391(2)   | C18 | C19 | 1.395(2)   |
| C4  | C5  | 1.377(2)   | C19 | C20 | 1.375(2)   |
| C5  | C6  | 1.3958(18) | C20 | C21 | 1.4008(18) |
| C7  | C8  | 1.4888(17) | C22 | C23 | 1.4928(17) |
| C7  | C10 | 1.5030(17) | C22 | C25 | 1.5045(17) |
| C10 | C11 | 1.5317(18) | C25 | C26 | 1.5294(17) |
| C10 | C15 | 1.5357(18) | C25 | C30 | 1.5380(18) |
| C11 | C12 | 1.5293(19) | C26 | C27 | 1.5295(18) |
| C12 | C13 | 1.521(2)   | C27 | C28 | 1.5273(19) |
| C13 | C14 | 1.522(2)   | C28 | C29 | 1.5202(19) |
| C14 | C15 | 1.5246(18) | C29 | C30 | 1.5266(19) |

**Table 5 Bond Angles for r20200612d.**

| Atom | Atom | Atom | Angle/°    | Atom | Atom | Atom | Angle/°    |
|------|------|------|------------|------|------|------|------------|
| C1   | N1   | C9   | 119.72(11) | C16  | N3   | C24  | 119.79(11) |
| C8   | N1   | C1   | 121.66(11) | C23  | N3   | C16  | 121.59(11) |
| C8   | N1   | C9   | 118.54(11) | C23  | N3   | C24  | 118.58(11) |
| C7   | N2   | C6   | 118.70(11) | C22  | N4   | C21  | 118.54(11) |
| N1   | C1   | C2   | 122.31(12) | N3   | C16  | C17  | 121.84(12) |
| N1   | C1   | C6   | 118.23(11) | N3   | C16  | C21  | 118.16(12) |
| C2   | C1   | C6   | 119.46(13) | C17  | C16  | C21  | 120.00(12) |
| C3   | C2   | C1   | 119.51(13) | C18  | C17  | C16  | 119.19(13) |
| C2   | C3   | C4   | 121.36(13) | C17  | C18  | C19  | 121.36(13) |
| C5   | C4   | C3   | 119.37(14) | C20  | C19  | C18  | 119.42(13) |
| C4   | C5   | C6   | 120.55(13) | C19  | C20  | C21  | 120.77(13) |
| N2   | C6   | C1   | 121.97(12) | N4   | C21  | C16  | 122.27(12) |
| N2   | C6   | C5   | 118.29(12) | N4   | C21  | C20  | 118.47(12) |
| C5   | C6   | C1   | 119.74(12) | C20  | C21  | C16  | 119.26(12) |
| N2   | C7   | C8   | 123.47(11) | N4   | C22  | C23  | 123.48(12) |
| N2   | C7   | C10  | 120.00(11) | N4   | C22  | C25  | 120.69(11) |
| C8   | C7   | C10  | 116.46(11) | C23  | C22  | C25  | 115.82(11) |
| O1   | C8   | N1   | 122.35(12) | O2   | C23  | N3   | 122.16(11) |
| O1   | C8   | C7   | 122.10(12) | O2   | C23  | C22  | 122.12(12) |
| N1   | C8   | C7   | 115.55(11) | N3   | C23  | C22  | 115.71(11) |
| C7   | C10  | C11  | 112.85(11) | C22  | C25  | C26  | 113.40(10) |
| C7   | C10  | C15  | 109.05(10) | C22  | C25  | C30  | 109.53(10) |
| C11  | C10  | C15  | 110.37(11) | C26  | C25  | C30  | 110.12(10) |

|     |     |     |            |     |     |     |            |
|-----|-----|-----|------------|-----|-----|-----|------------|
| C12 | C11 | C10 | 110.98(11) | C25 | C26 | C27 | 110.93(11) |
| C13 | C12 | C11 | 111.60(12) | C28 | C27 | C26 | 111.63(11) |
| C12 | C13 | C14 | 110.93(12) | C29 | C28 | C27 | 110.92(11) |
| C13 | C14 | C15 | 111.23(11) | C28 | C29 | C30 | 111.28(11) |
| C14 | C15 | C10 | 110.97(11) | C29 | C30 | C25 | 111.18(11) |

**Table 6 Hydrogen Atom Coordinates ( $\text{\AA}\times 10^4$ ) and Isotropic Displacement Parameters ( $\text{\AA}^2\times 10^3$ ) for r20200612d.**

| Atom | <i>x</i> | <i>y</i> | <i>z</i> | U(eq) |
|------|----------|----------|----------|-------|
| H2   | 5311.1   | 5776.46  | 6427.64  | 35    |
| H3   | 3259.42  | 7130.75  | 7942.74  | 41    |
| H4   | 2442.08  | 6463.38  | 9794.52  | 39    |
| H5   | 3652.85  | 4401.43  | 10118.59 | 33    |
| H9A  | 6765.18  | 4103.84  | 4978.39  | 50    |
| H9B  | 8439.1   | 3102.66  | 4834.81  | 50    |
| H9C  | 7839.13  | 4468.98  | 5415.6   | 50    |
| H10  | 8258.03  | -2.11    | 7378.86  | 26    |
| H11A | 6332.19  | 633.24   | 9798.02  | 34    |
| H11B | 5974.31  | 139.95   | 8791.24  | 34    |
| H12A | 6956.89  | -1490.78 | 9941.28  | 41    |
| H12B | 8017.57  | -1801.39 | 8589.4   | 41    |
| H13A | 9549.43  | -2273.7  | 9753.61  | 37    |
| H13B | 8611.95  | -910.29  | 10415.09 | 37    |
| H14A | 10486.29 | -1490.4  | 7987.2   | 35    |
| H14B | 10858.65 | -1013.79 | 8994.17  | 35    |
| H15A | 9884.01  | 633      | 7865.29  | 29    |
| H15B | 8811.24  | 932.71   | 9214.83  | 29    |
| H17  | 8436.31  | -1210.22 | 5104.18  | 32    |
| H18  | 8401.91  | -2892.69 | 6174.48  | 38    |
| H19  | 6182.8   | -2784.09 | 7618.66  | 38    |
| H20  | 3973.08  | -978.73  | 7989.79  | 33    |
| H24A | 8331.22  | 700.36   | 4570.12  | 42    |
| H24B | 7250.81  | 1675.21  | 3939.68  | 42    |
| H24C | 7754.33  | 227      | 3708.74  | 42    |
| H25  | 2050.57  | 3590.83  | 6006.04  | 25    |
| H26A | 682.49   | 2629.25  | 8074.92  | 29    |
| H26B | 589.62   | 2478.07  | 6805.11  | 29    |
| H27A | -832.35  | 4624.95  | 6863.73  | 34    |

|      |          |         |         |    |
|------|----------|---------|---------|----|
| H27B | -1657.27 | 4125.93 | 8017.1  | 34 |
| H28A | -1554.5  | 5985.68 | 8490.99 | 35 |
| H28B | -702.86  | 4868.39 | 9158.63 | 35 |
| H29A | 824.23   | 5910.77 | 8353.01 | 38 |
| H29B | 746.85   | 5759.5  | 7077.87 | 38 |
| H30A | 2239.57  | 3762.42 | 8296.37 | 33 |
| H30B | 3077.63  | 4266.89 | 7153.57 | 33 |

## Experimental

Single crystals of C<sub>15</sub>H<sub>18</sub>N<sub>2</sub>O [r20200612d] were [1]. A suitable crystal was selected and [1] on a 'Rigaku Saturn 70 CCD' diffractometer. The crystal was kept at 113.15 K during data collection. Using Olex2 [1], the structure was solved with the ShelXT [2] structure solution program using Intrinsic Phasing and refined with the ShelXL [3] refinement package using Least Squares minimisation.

1. Dolomanov, O.V., Bourhis, L.J., Gildea, R.J., Howard, J.A.K. & Puschmann, H. (2009), J. Appl. Cryst. 42, 339-341.
2. Sheldrick, G.M. (2015). Acta Cryst. A71, 3-8.
3. Sheldrick, G.M. (2015). Acta Cryst. C71, 3-8.

## Crystal structure determination of [r20200612d]

**Crystal Data** for C<sub>15</sub>H<sub>18</sub>N<sub>2</sub>O (*M*=242.31 g/mol): triclinic, space group P-1 (no. 2), *a* = 10.3988(9) Å, *b* = 11.9760(9) Å, *c* = 12.1316(8) Å,  $\alpha$  = 86.151(6)°,  $\beta$  = 70.363(7)°,  $\gamma$  = 65.045(8)°, *V* = 1285.17(19) Å<sup>3</sup>, *Z* = 4, *T* = 113.15 K,  $\mu$ (MoK $\alpha$ ) = 0.080 mm<sup>-1</sup>, *D*<sub>calc</sub> = 1.252 g/cm<sup>3</sup>, 13407 reflections measured (3.578° ≤ 2 $\theta$  ≤ 52.734°), 5209 unique (*R*<sub>int</sub> = 0.0265, *R*<sub>sigma</sub> = 0.0300) which were used in all calculations. The final *R*<sub>1</sub> was 0.0433 (*I* > 2 $\sigma$ (*I*)) and *wR*<sub>2</sub> was 0.1162 (all data).

## Refinement model description

Number of restraints - 0, number of constraints - unknown.

Details:

### 1. Fixed Uiso

At 1.2 times of:

All C(H) groups, All C(H,H) groups

At 1.5 times of:

All C(H,H,H) groups

### 2.a Ternary CH refined with riding coordinates:

C10(H10), C25(H25)

### 2.b Secondary CH2 refined with riding coordinates:

C11(H11A,H11B), C12(H12A,H12B), C13(H13A,H13B), C14(H14A,H14B), C15(H15A, H15B), C26(H26A,H26B), C27(H27A,H27B), C28(H28A,H28B), C29(H29A,H29B), C30(H30A,H30B)

### 2.c Aromatic/amide H refined with riding coordinates:

C2(H2), C3(H3), C4(H4), C5(H5), C17(H17), C18(H18), C19(H19), C20(H20)

2.d Idealised Me refined as rotating group:  
C9(H9A,H9B,H9C), C24(H24A,H24B,H24C)

## 12. Spectra of prepared compounds

<sup>1</sup>H NMR spectrum of compound **3aa**

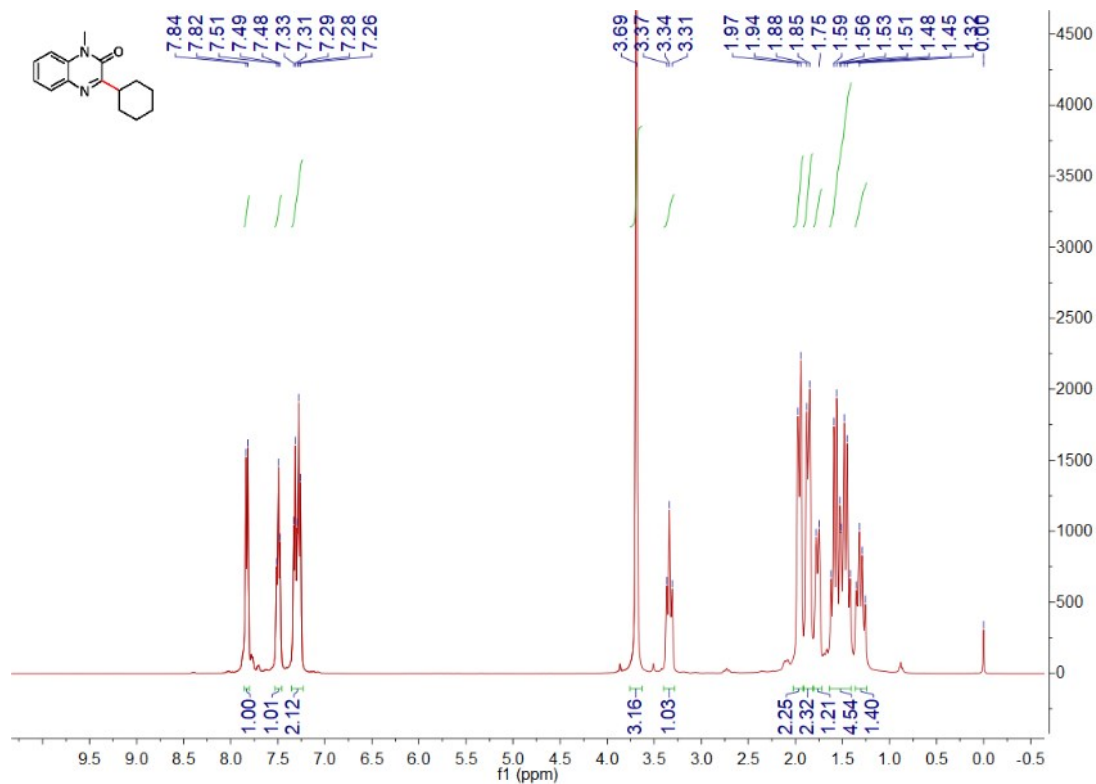

<sup>13</sup>C NMR spectrum of compound **3aa**

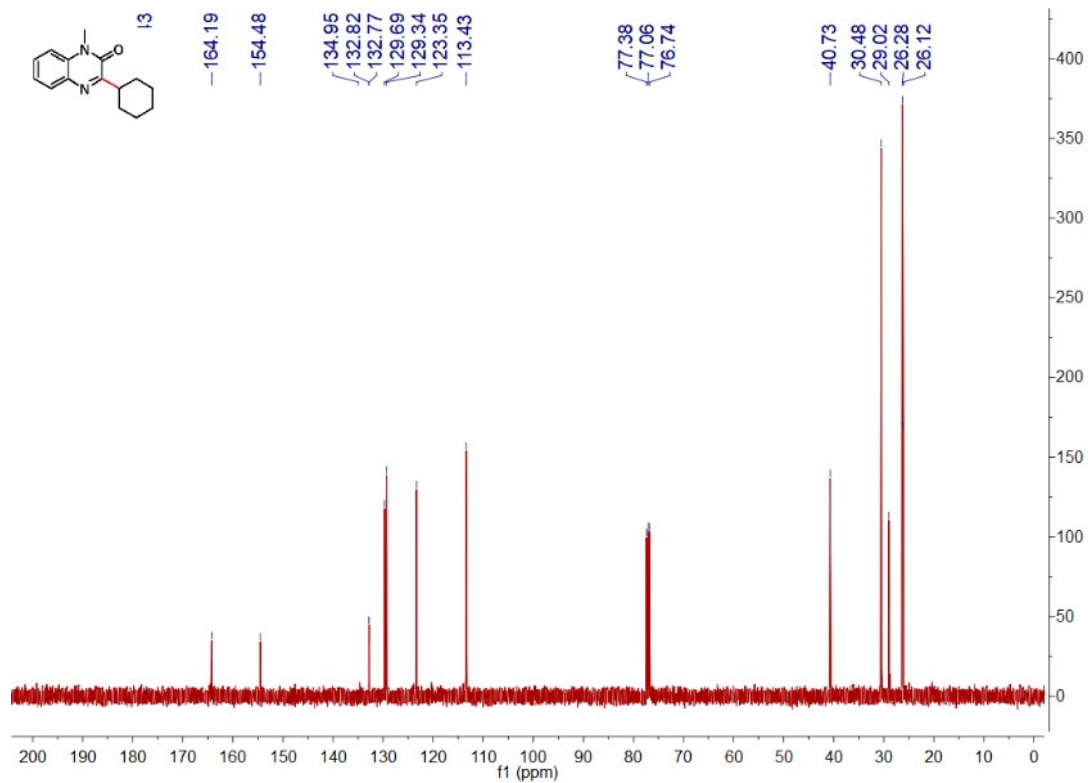

**<sup>1</sup>H NMR spectrum of compound **3ab****

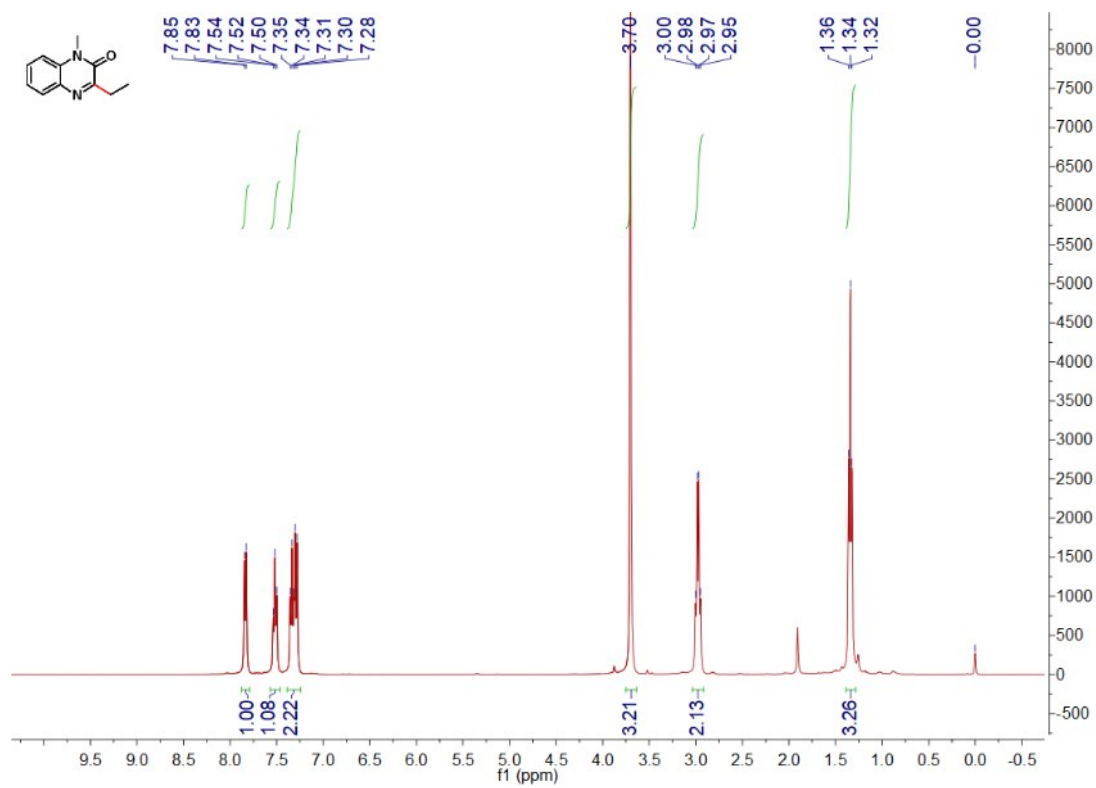

**<sup>13</sup>C NMR spectrum of compound **3ab****

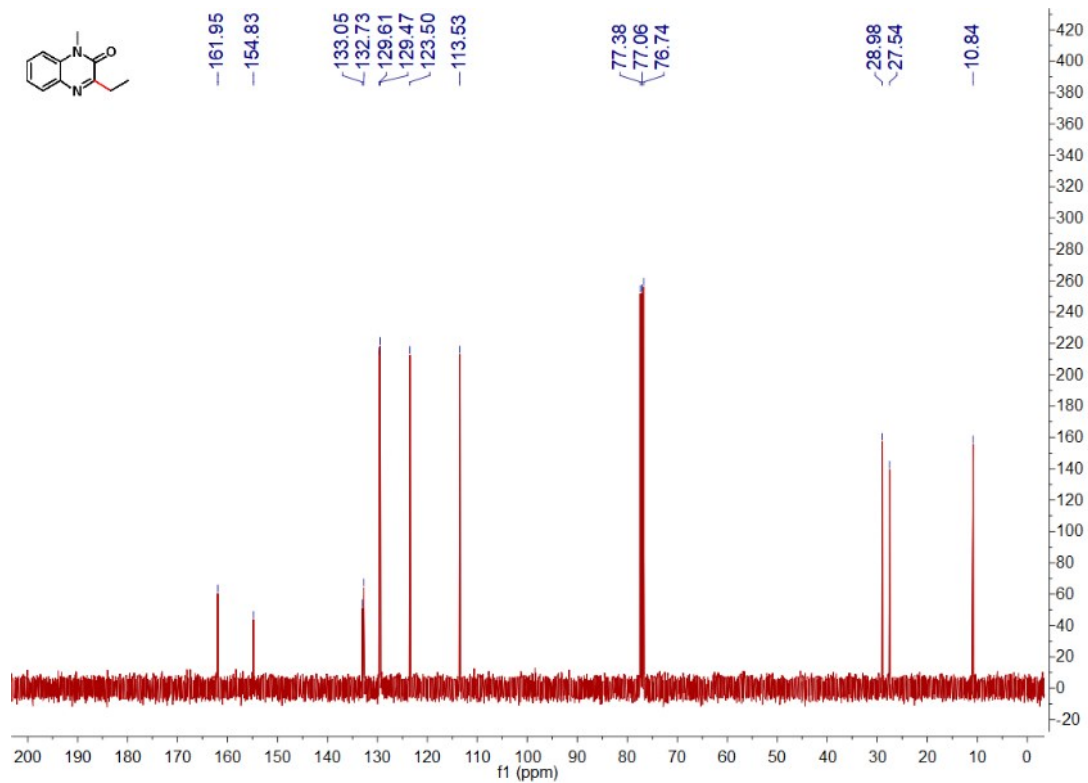

<sup>1</sup>H NMR spectrum of compound 3ac

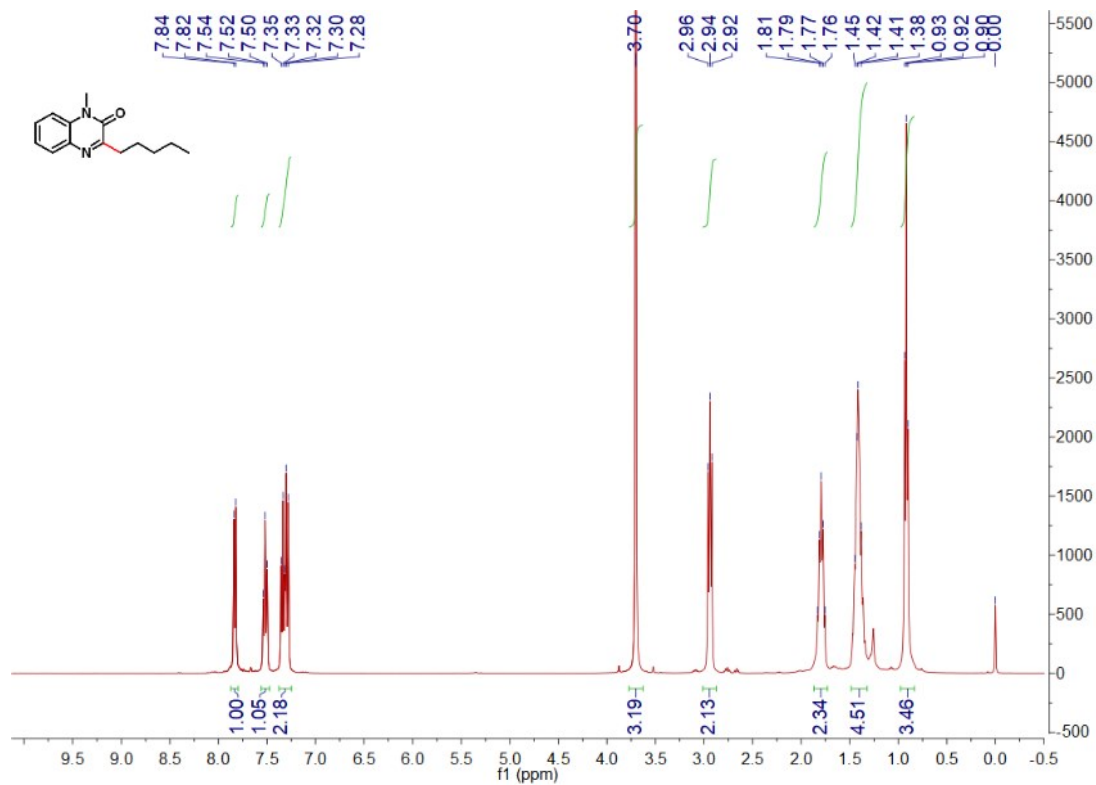

<sup>13</sup>C NMR spectrum of compound 3ac

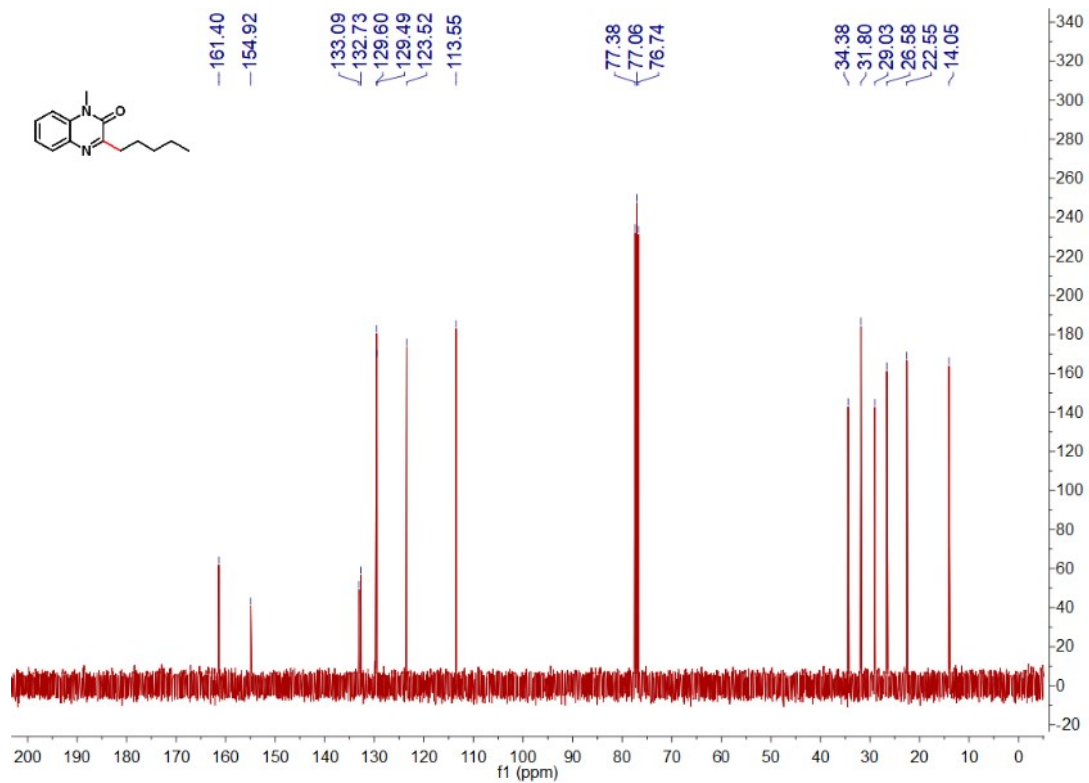

**<sup>1</sup>H NMR spectrum of compound 3ad**

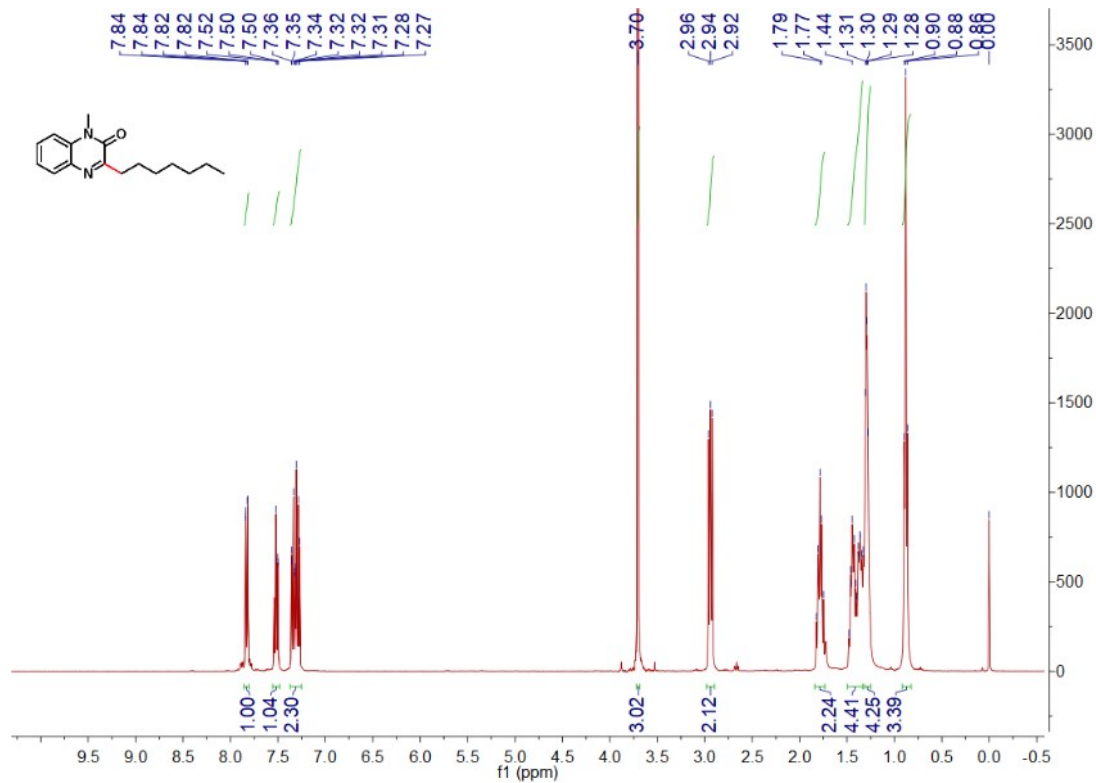

**<sup>13</sup>C NMR spectrum of compound 3ad**

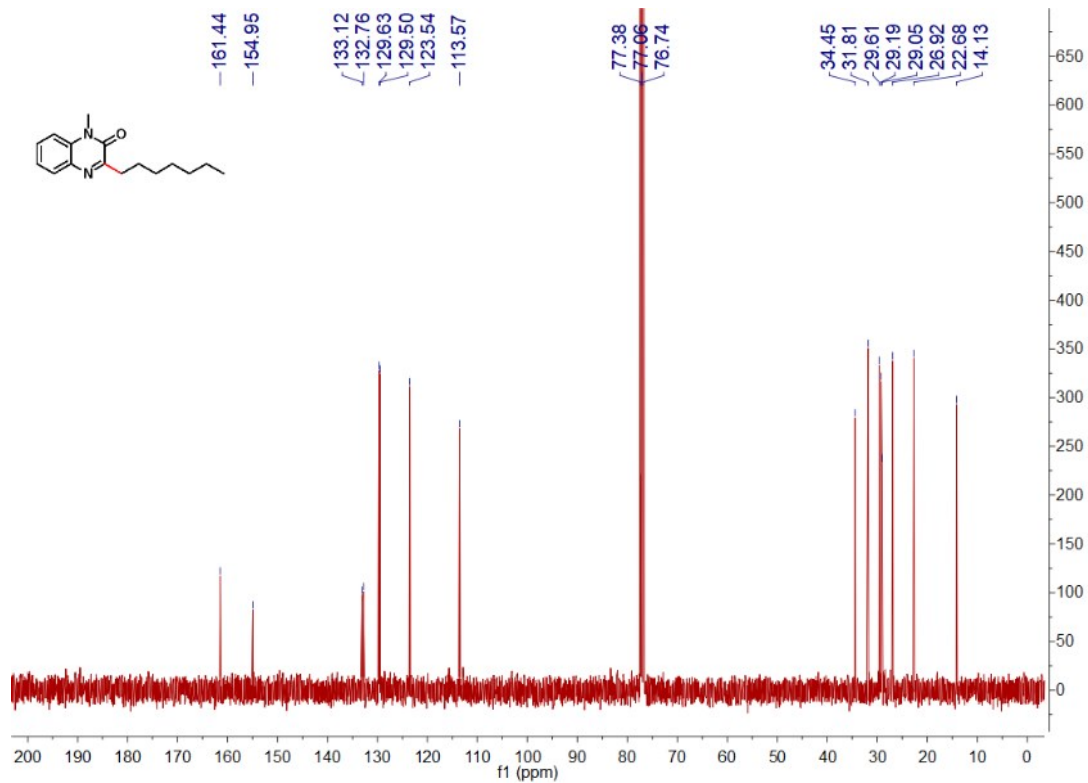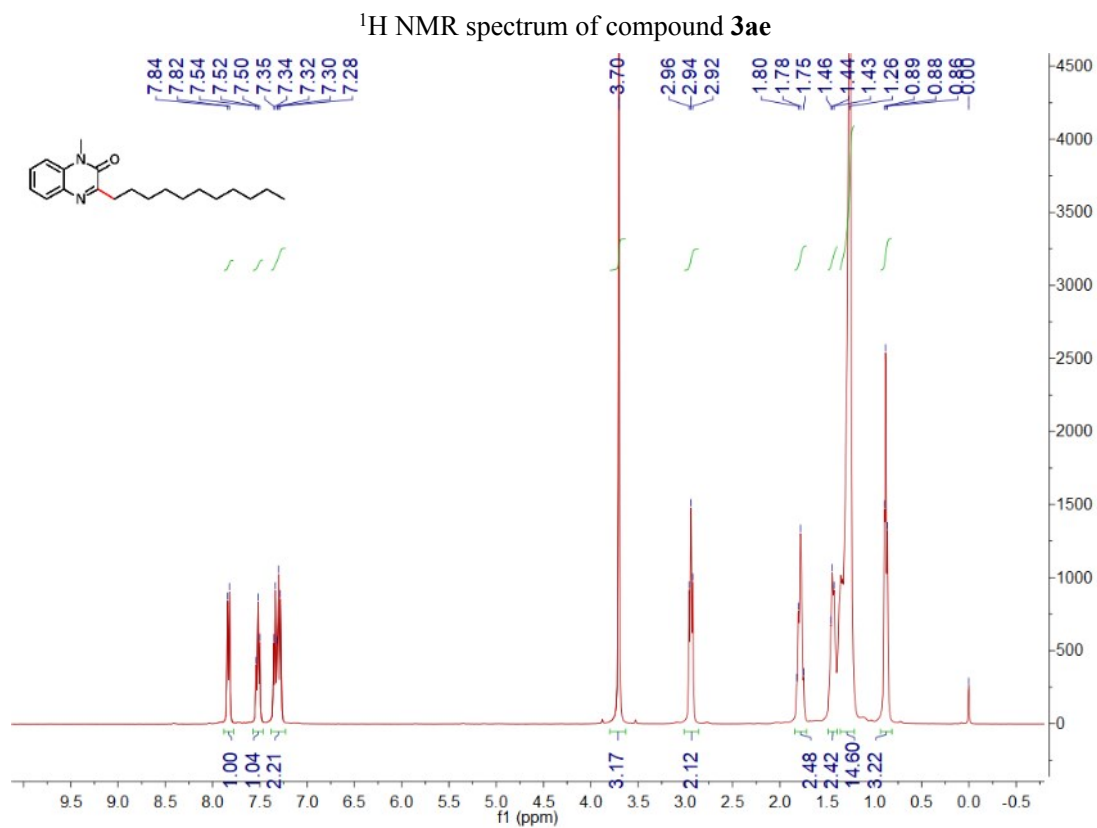

**<sup>13</sup>C NMR spectrum of compound 3ae**



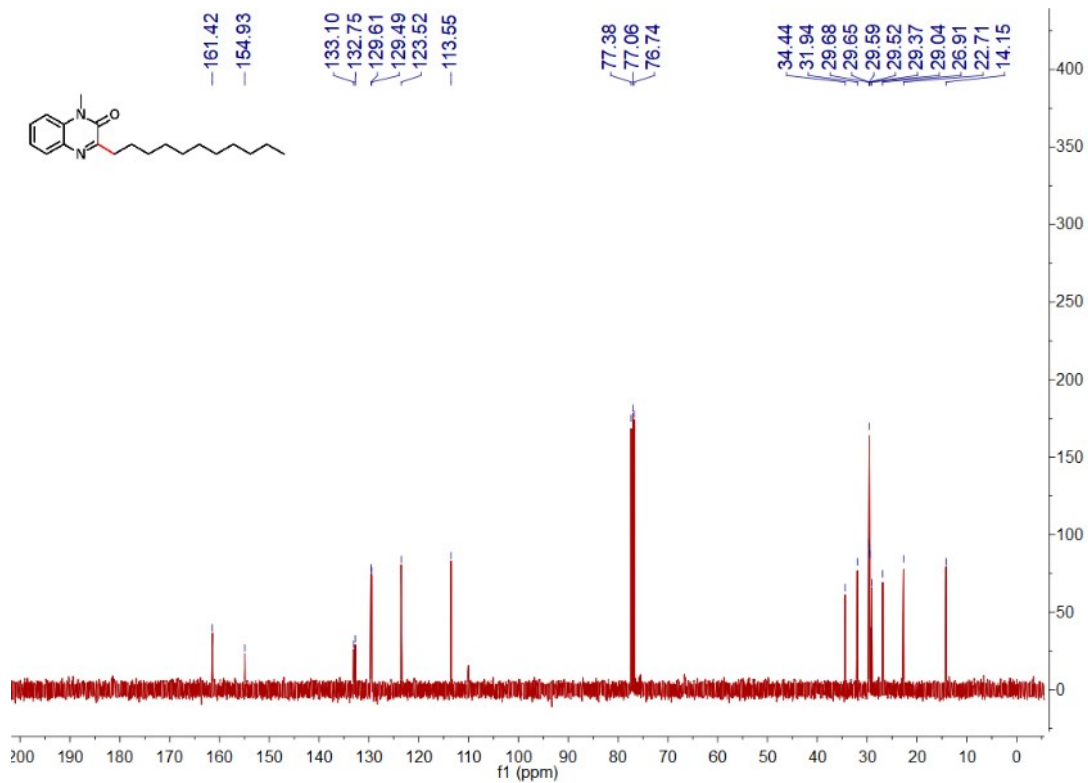

**<sup>1</sup>H NMR spectrum of compound 3af**

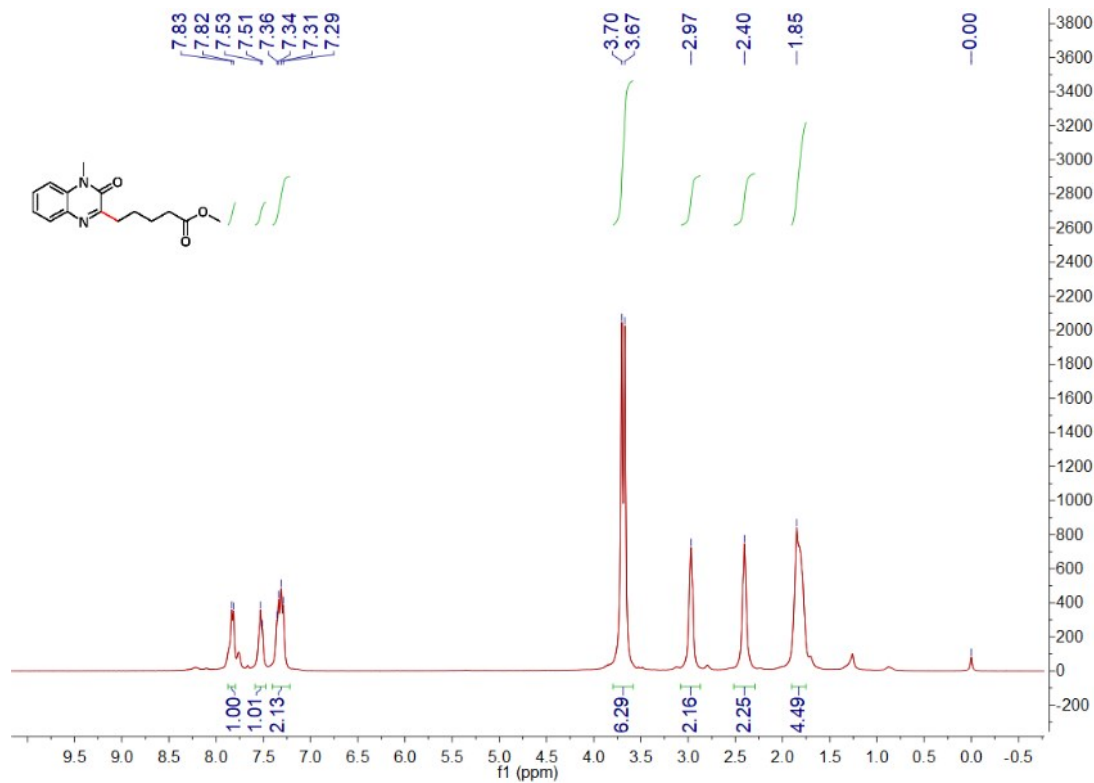

**<sup>13</sup>C NMR spectrum of compound 3af**

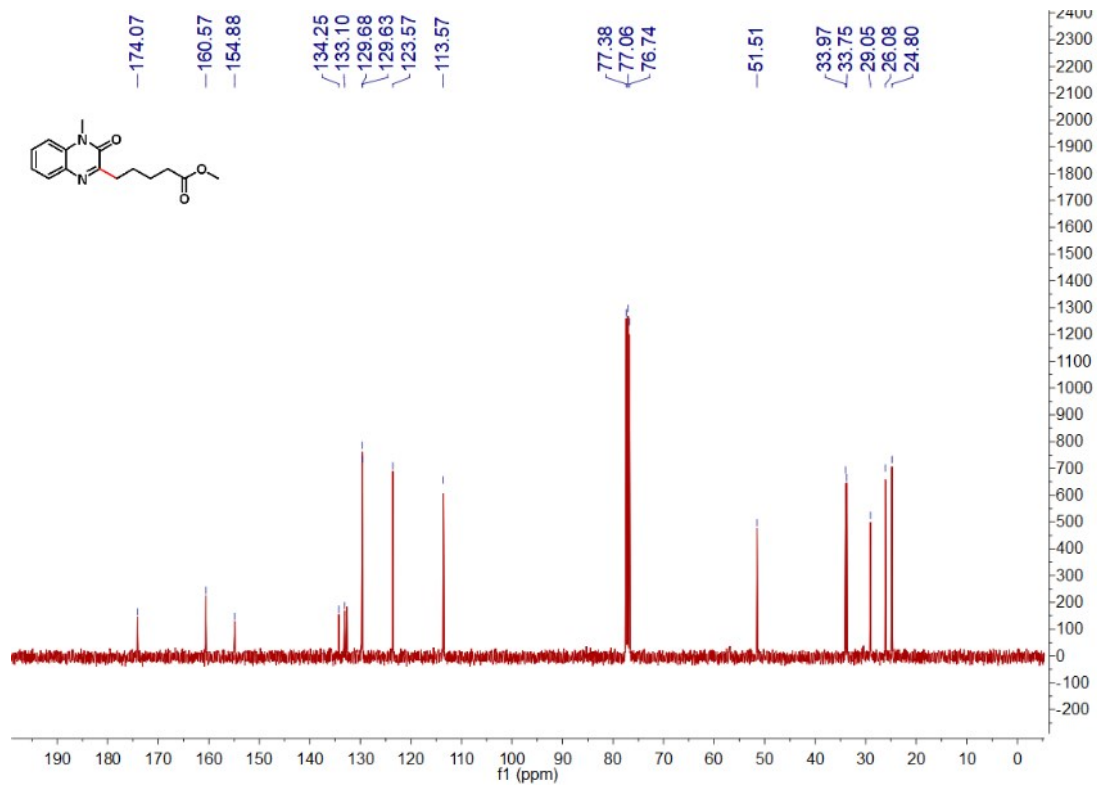

<sup>1</sup>H NMR spectrum of compound 3ag

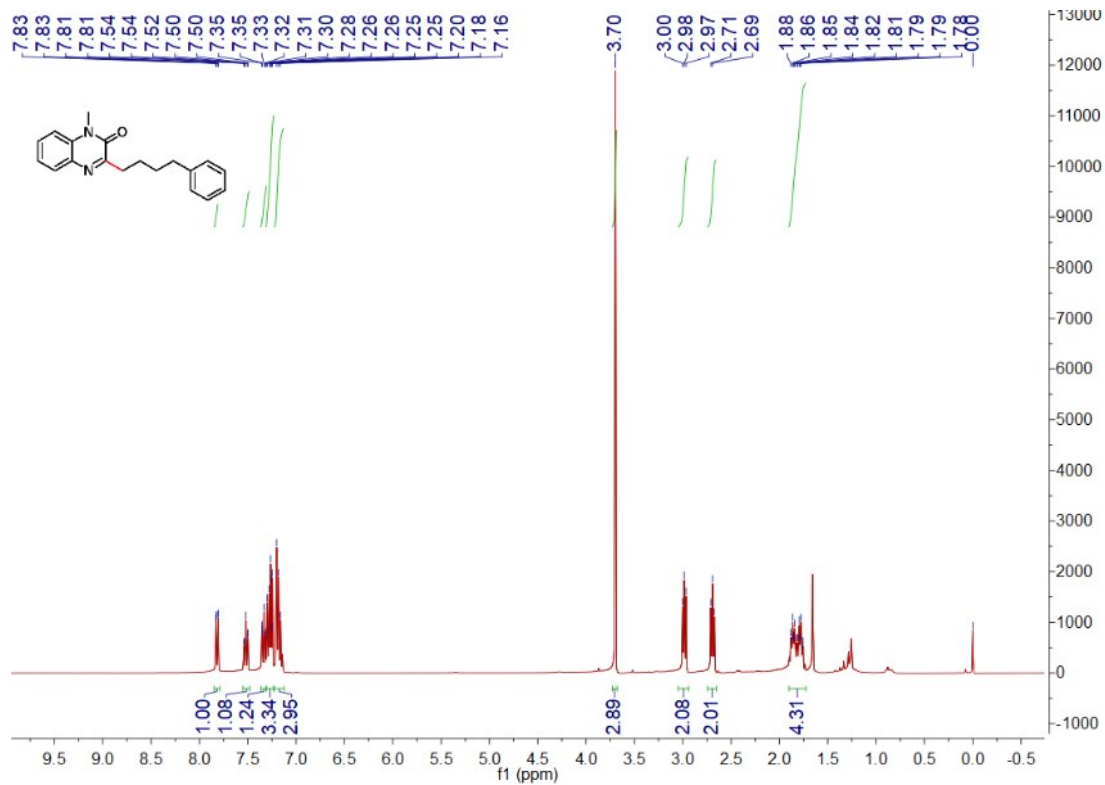

<sup>13</sup>C NMR spectrum of compound 3ag

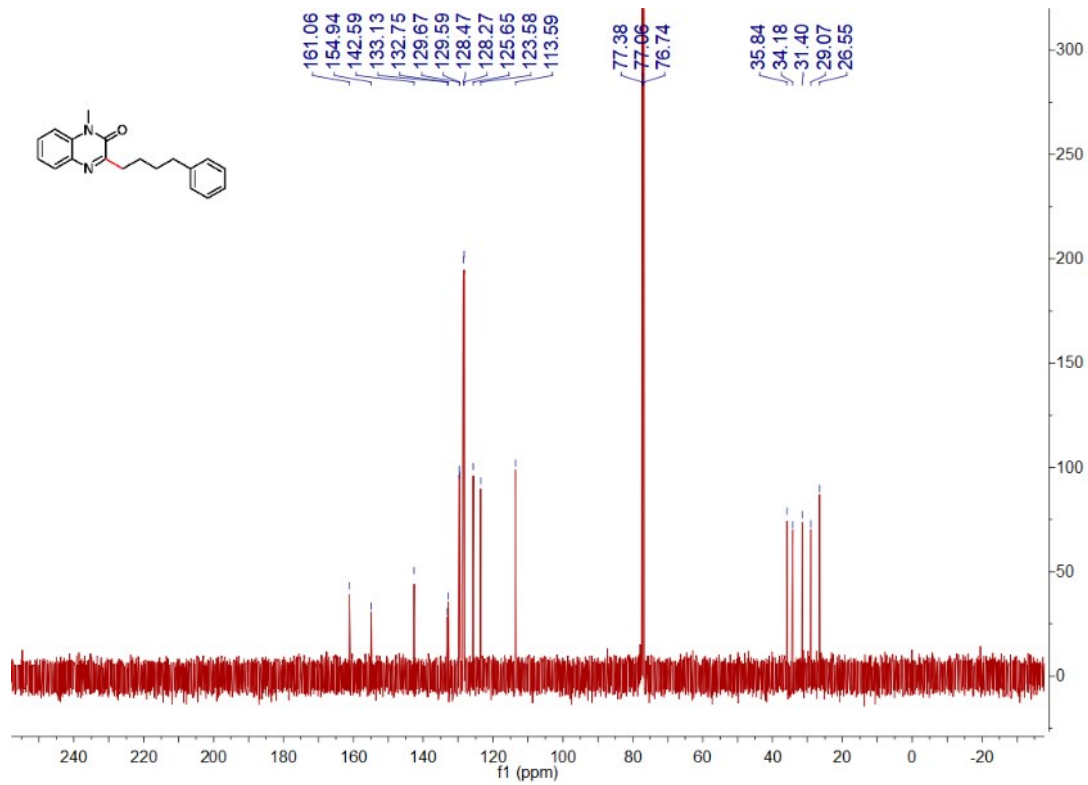

**<sup>1</sup>H NMR spectrum of compound 3ah**

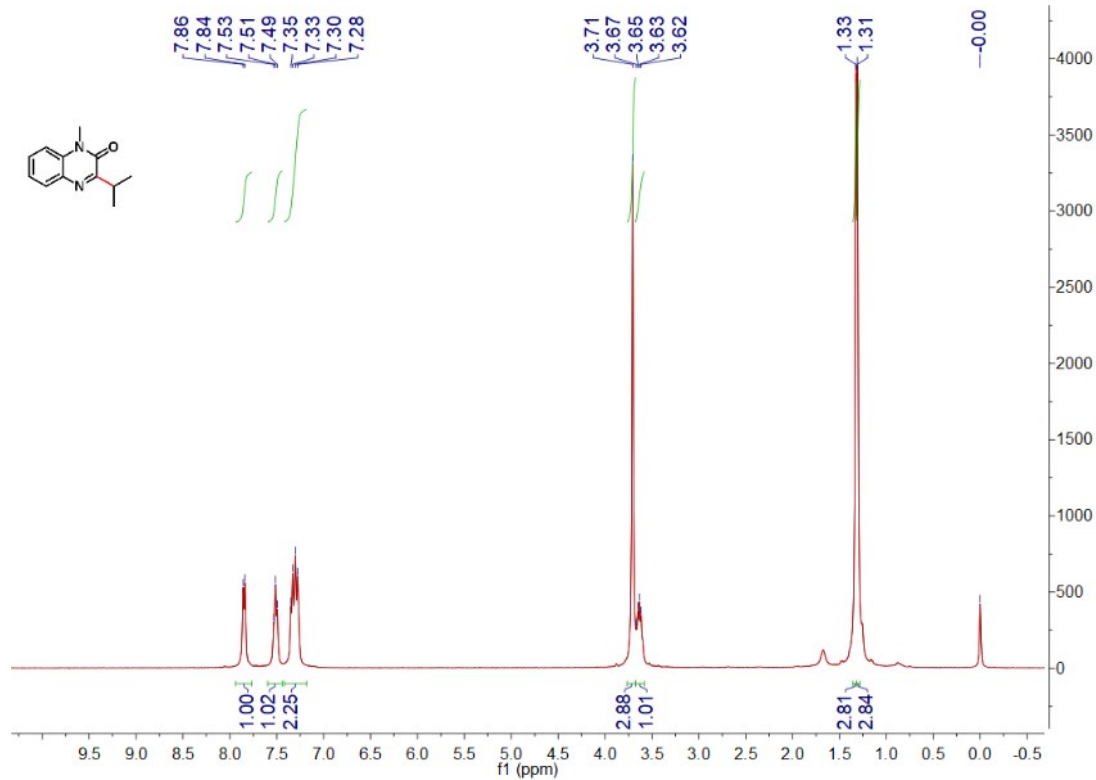

**<sup>13</sup>C NMR spectrum of compound 3ah**

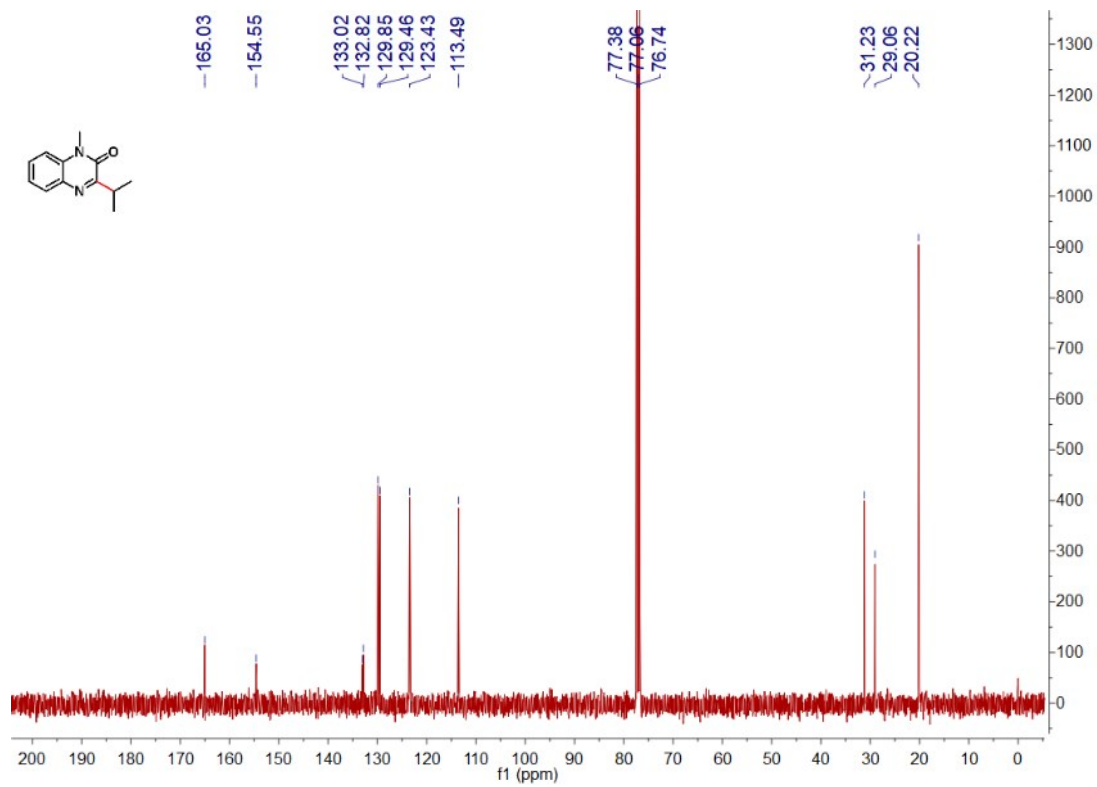

<sup>1</sup>H NMR spectrum of compound 3ai

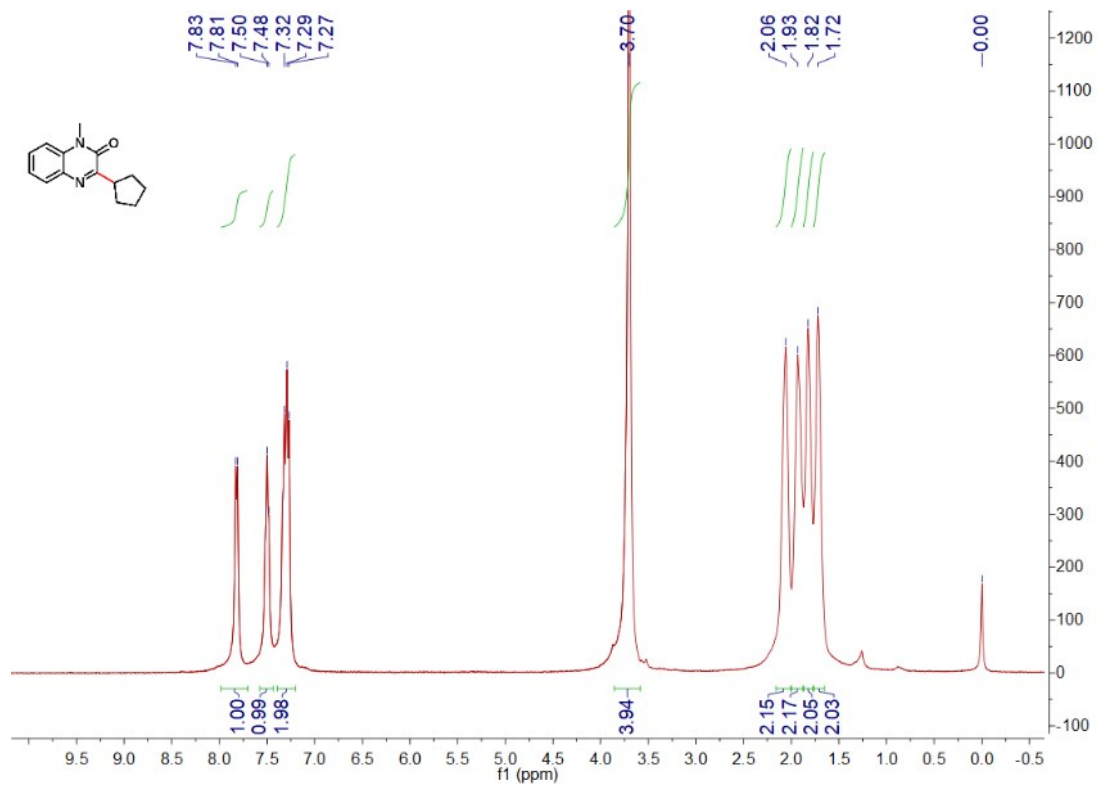

<sup>13</sup>C NMR spectrum of compound 3ai

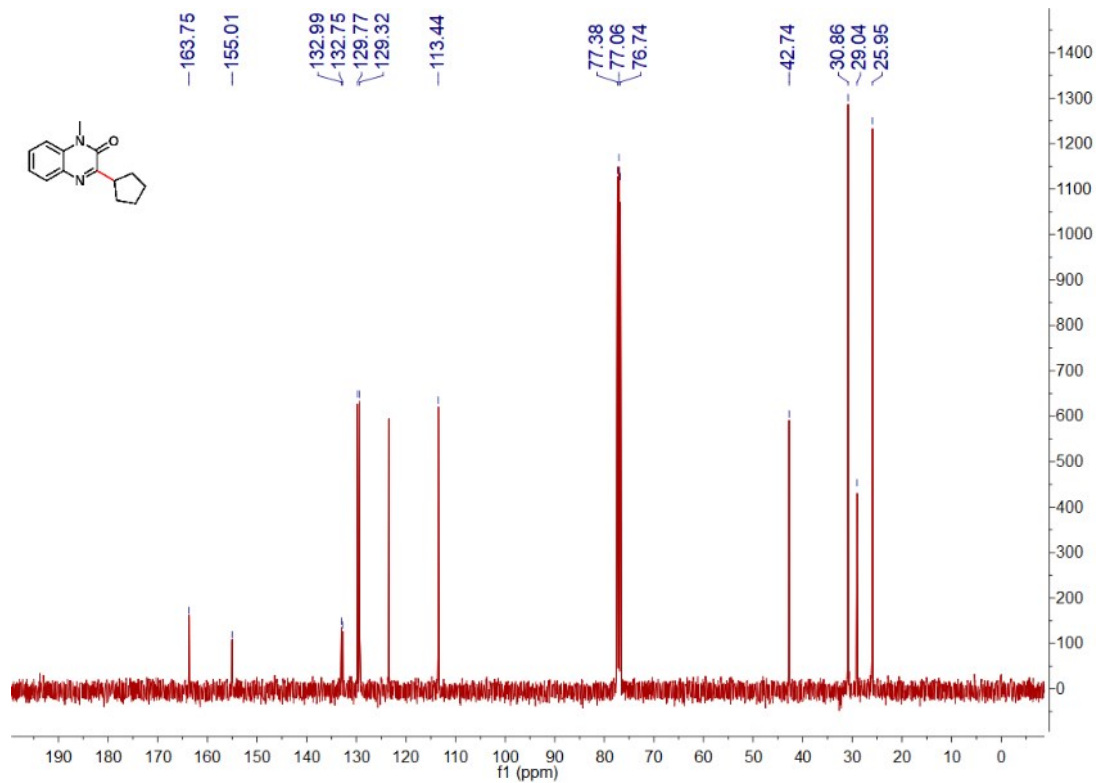

**<sup>1</sup>H NMR spectrum of compound 3aj**

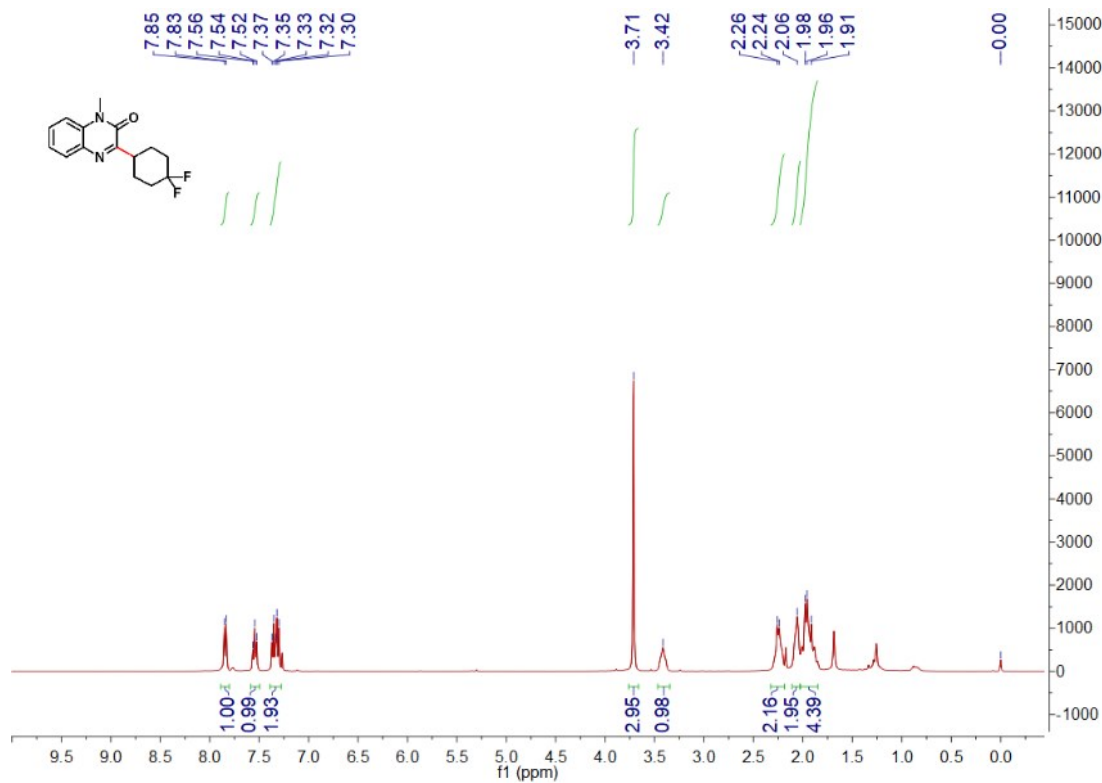

**<sup>13</sup>C NMR spectrum of compound 3aj**

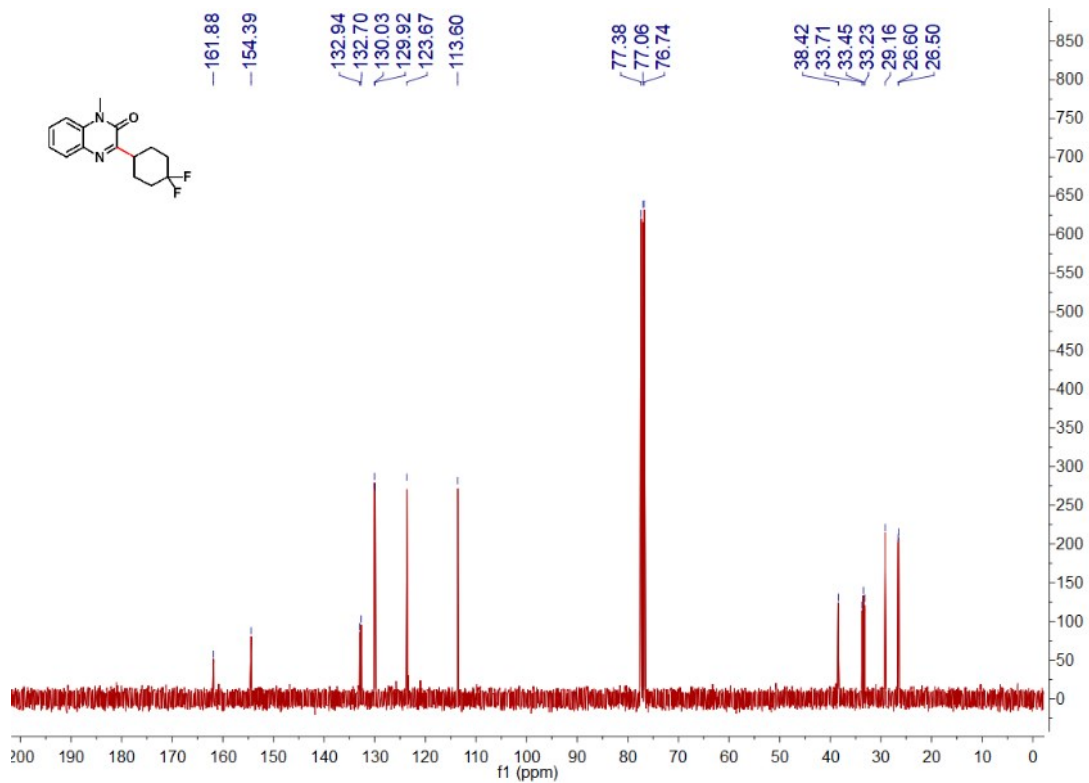

<sup>19</sup>F NMR spectrum of compound **3aj**

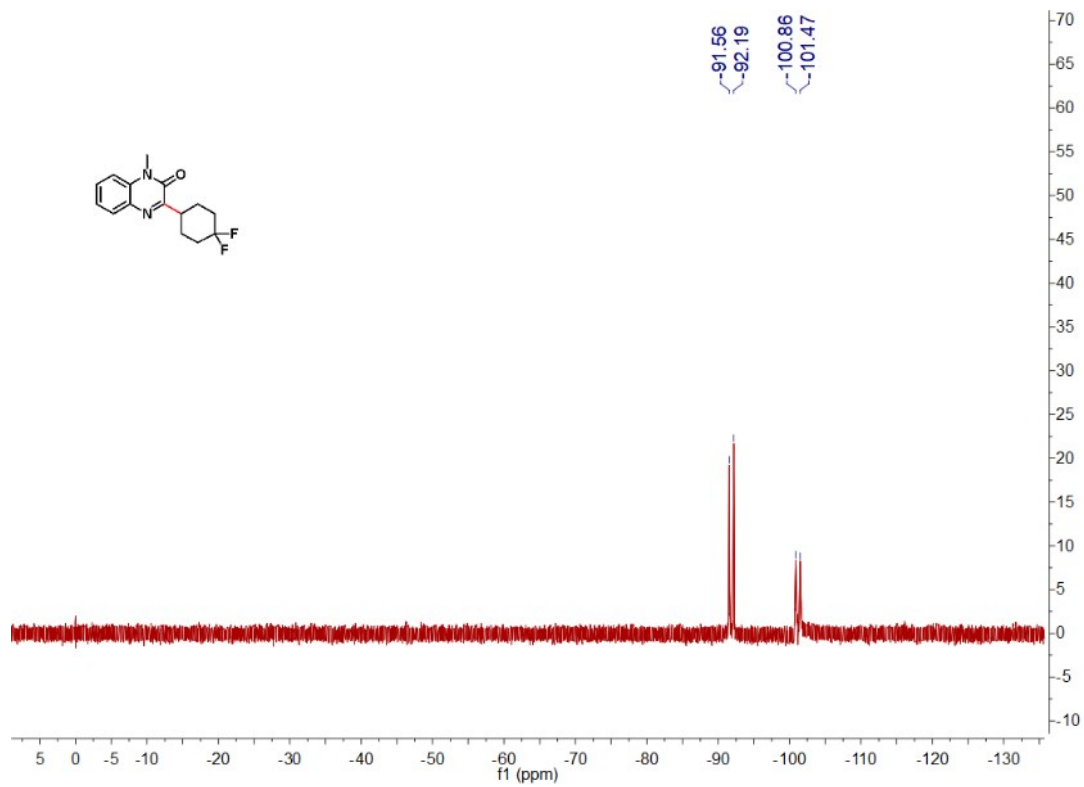

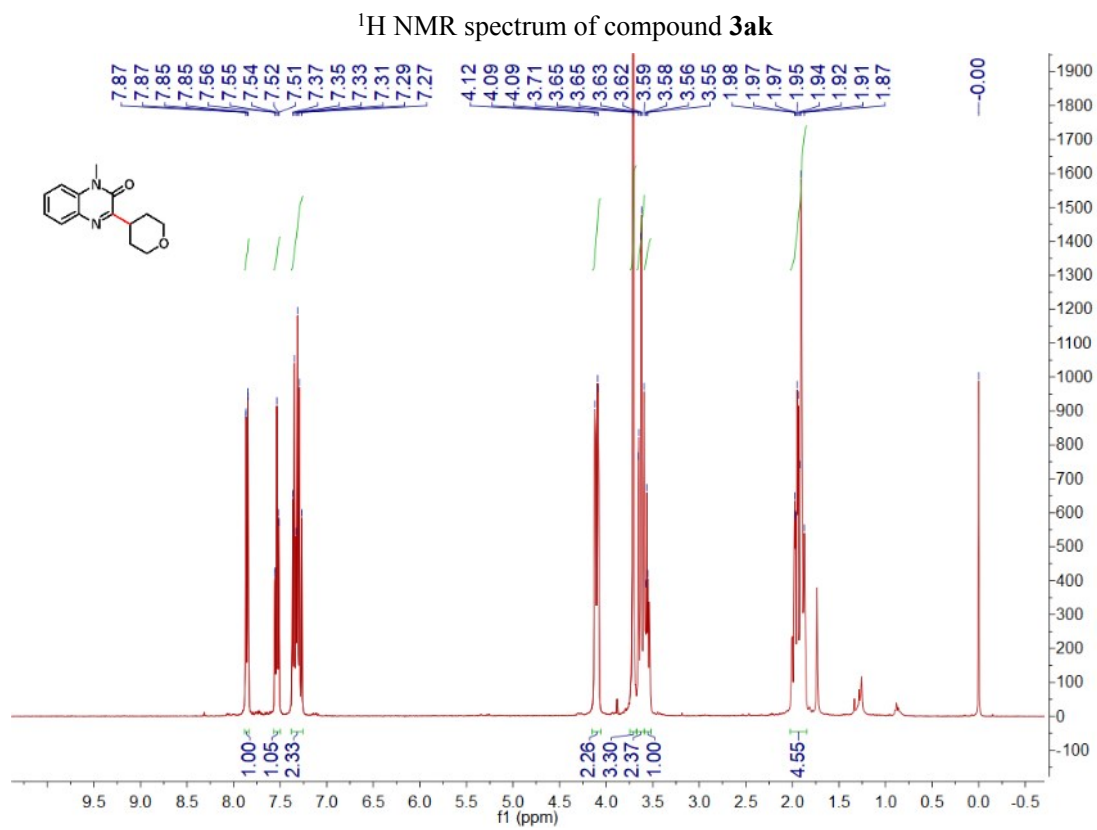

**<sup>13</sup>C NMR spectrum of compound 3ak**

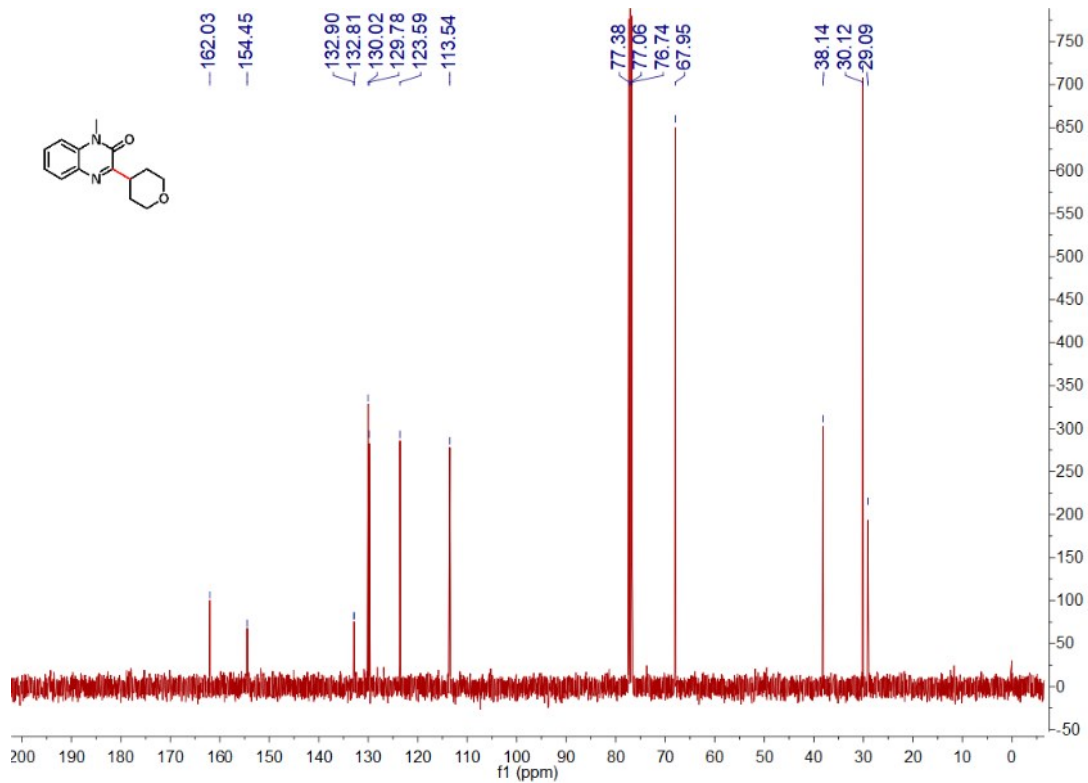

**<sup>1</sup>H NMR spectrum of compound 3al**

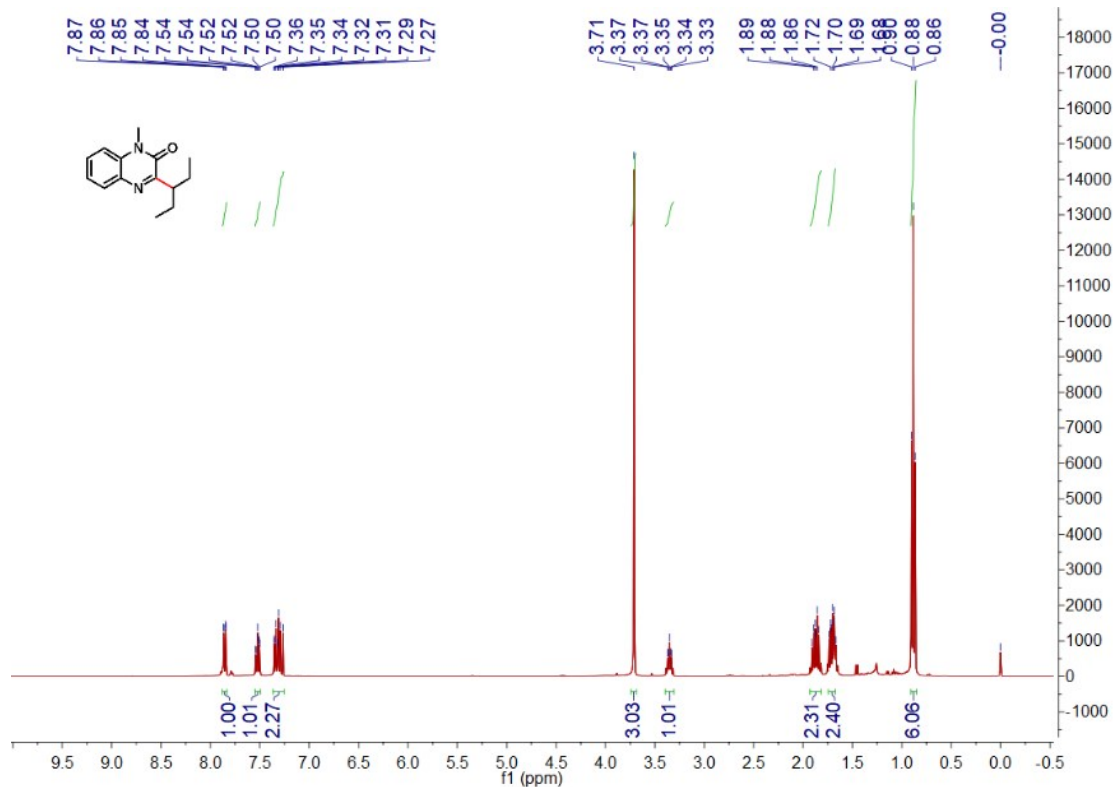

**<sup>13</sup>C NMR spectrum of compound 3al**



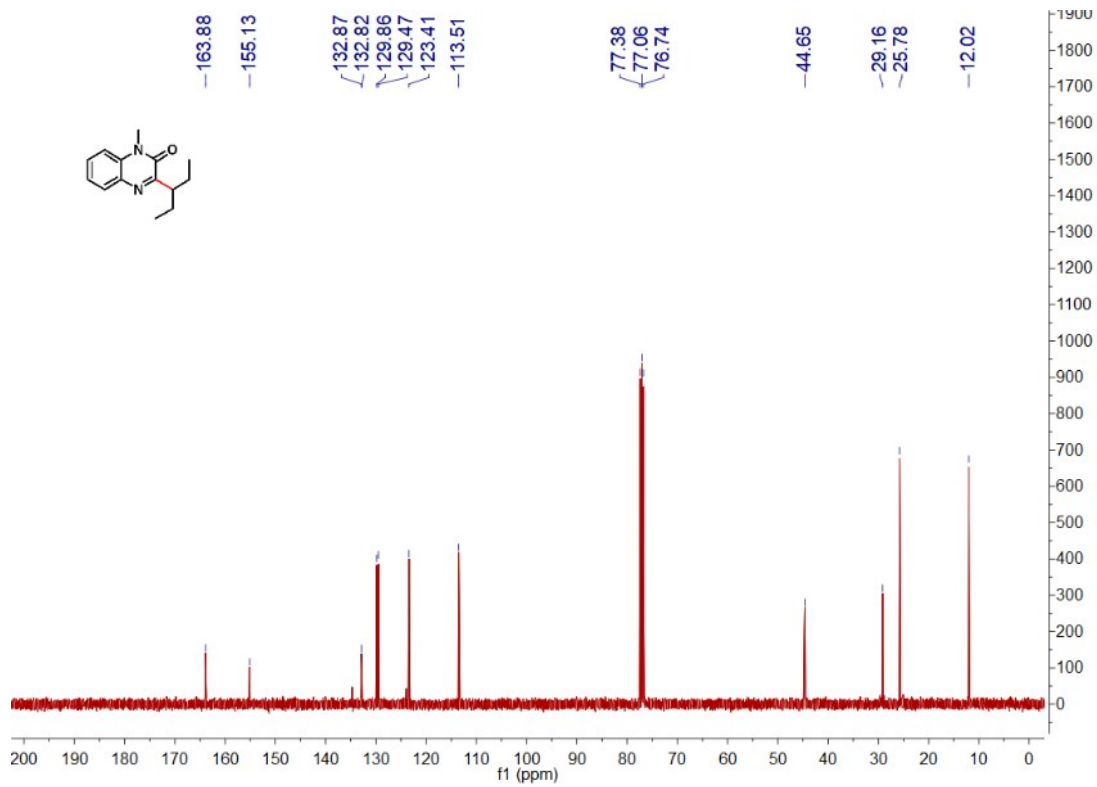

**<sup>1</sup>H NMR spectrum of compound 3am**

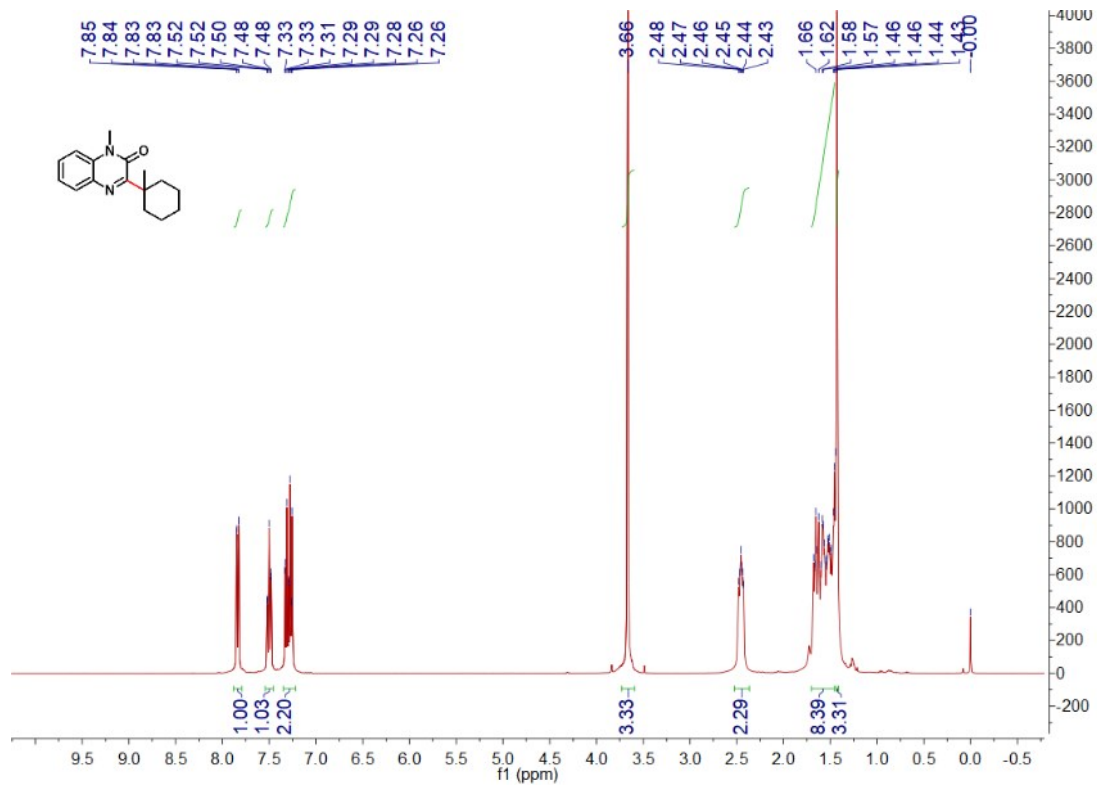

**<sup>13</sup>C NMR spectrum of compound 3am**

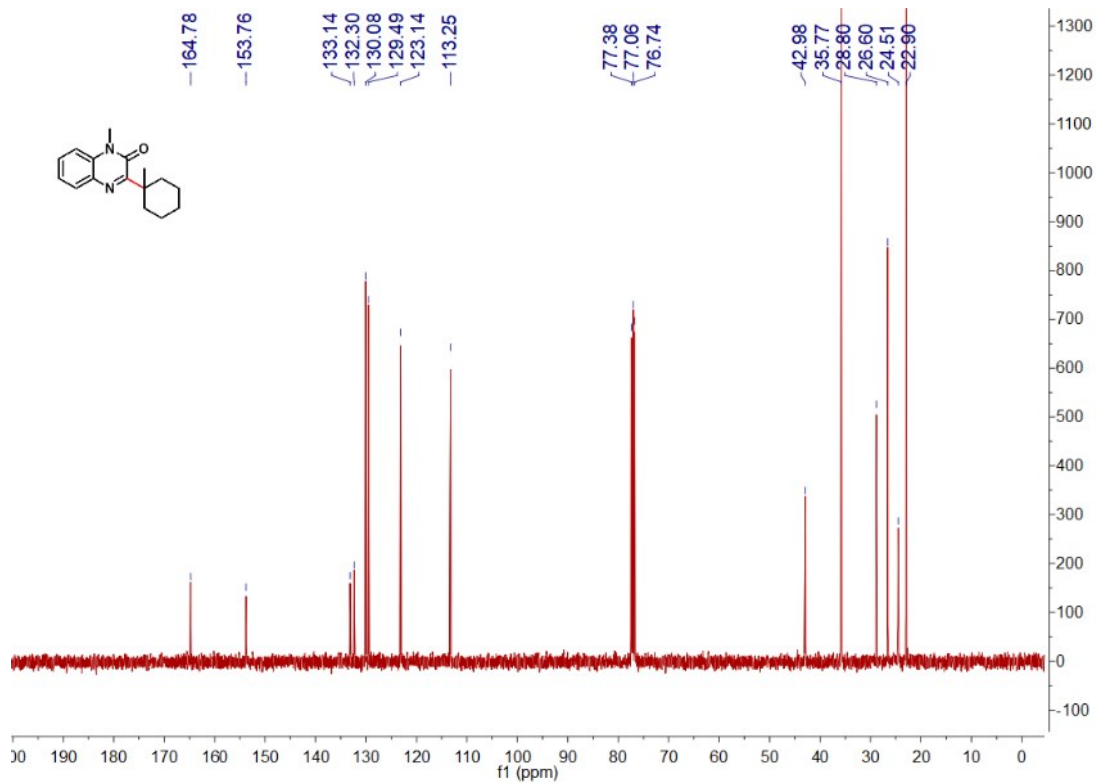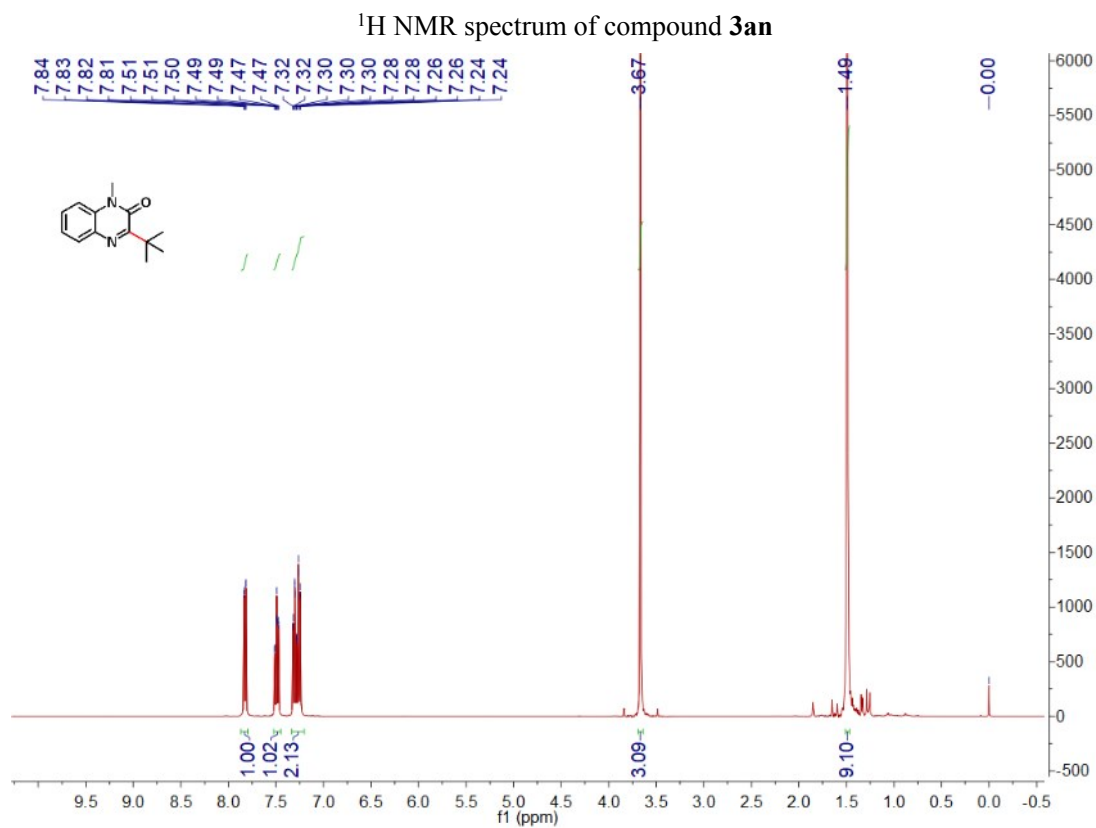

**<sup>13</sup>C NMR spectrum of compound 3an**

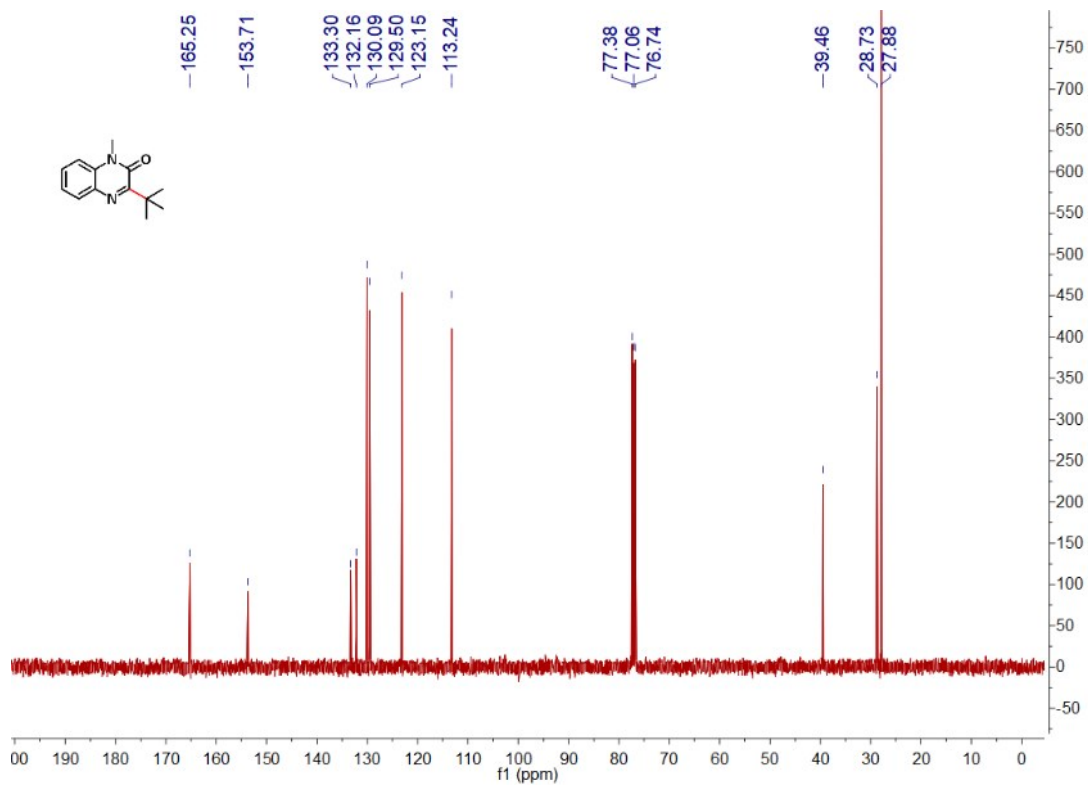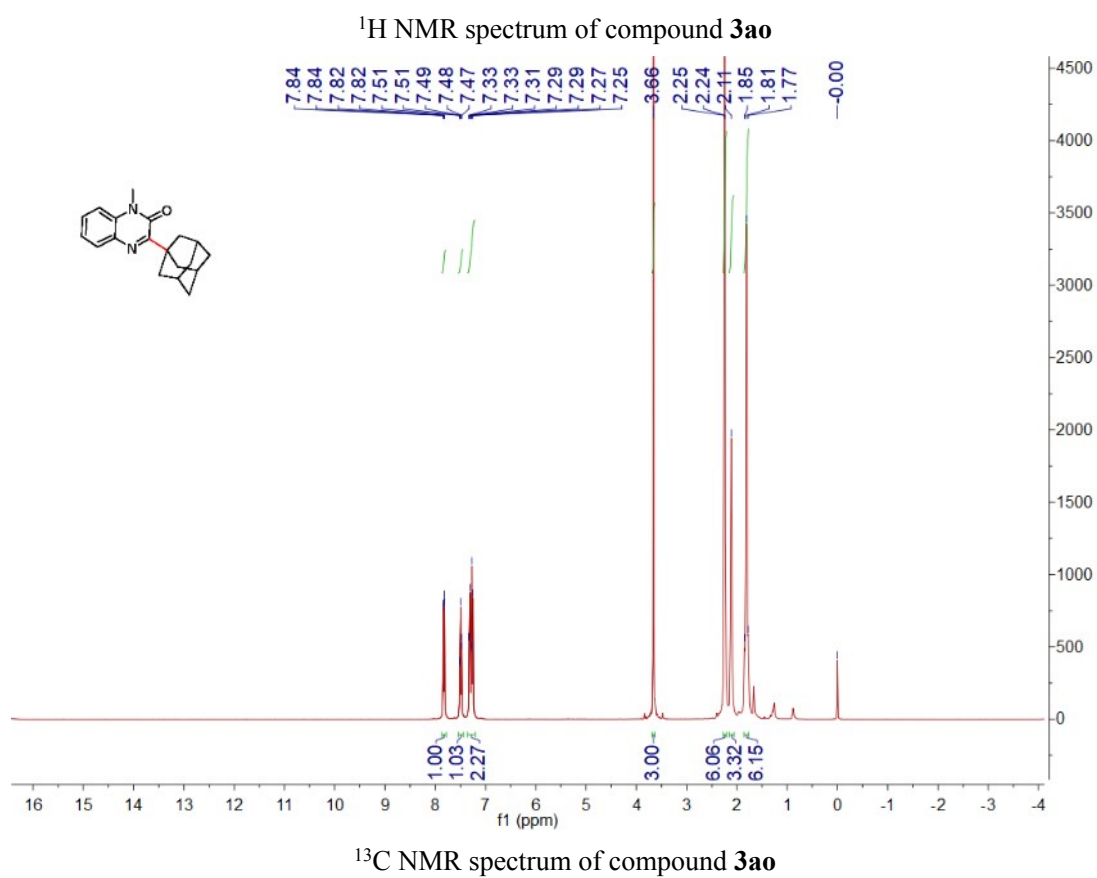

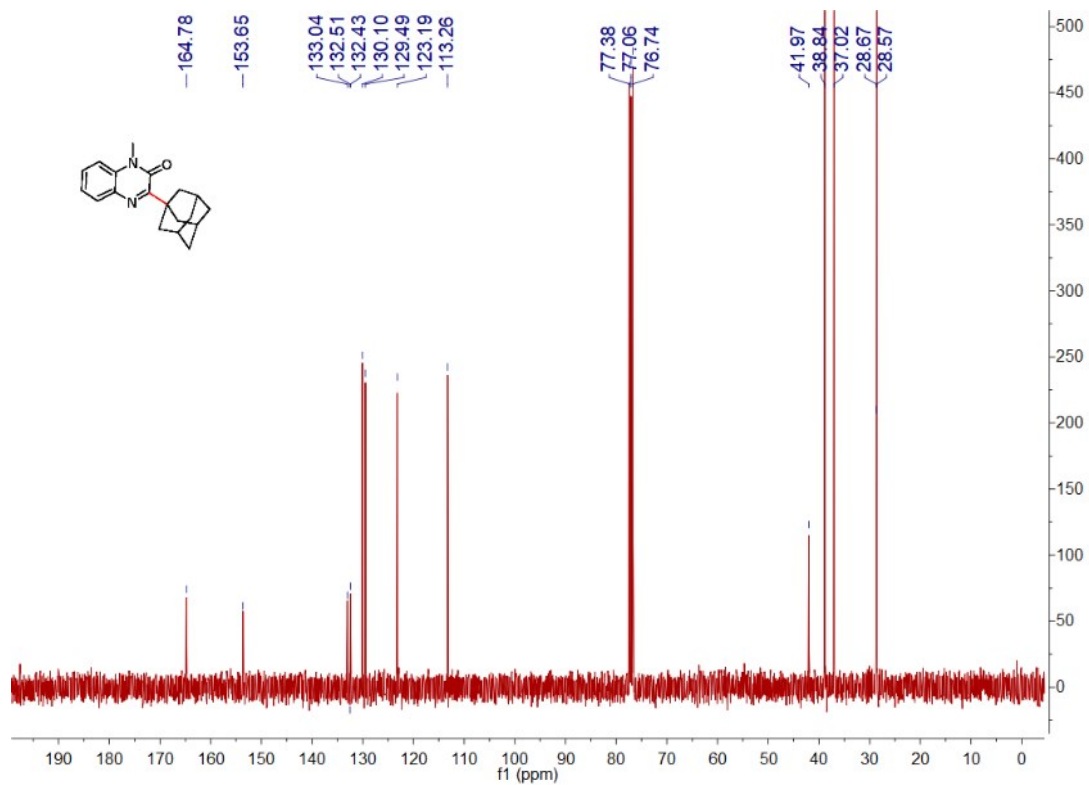

**<sup>1</sup>H NMR spectrum of compound 3ap**

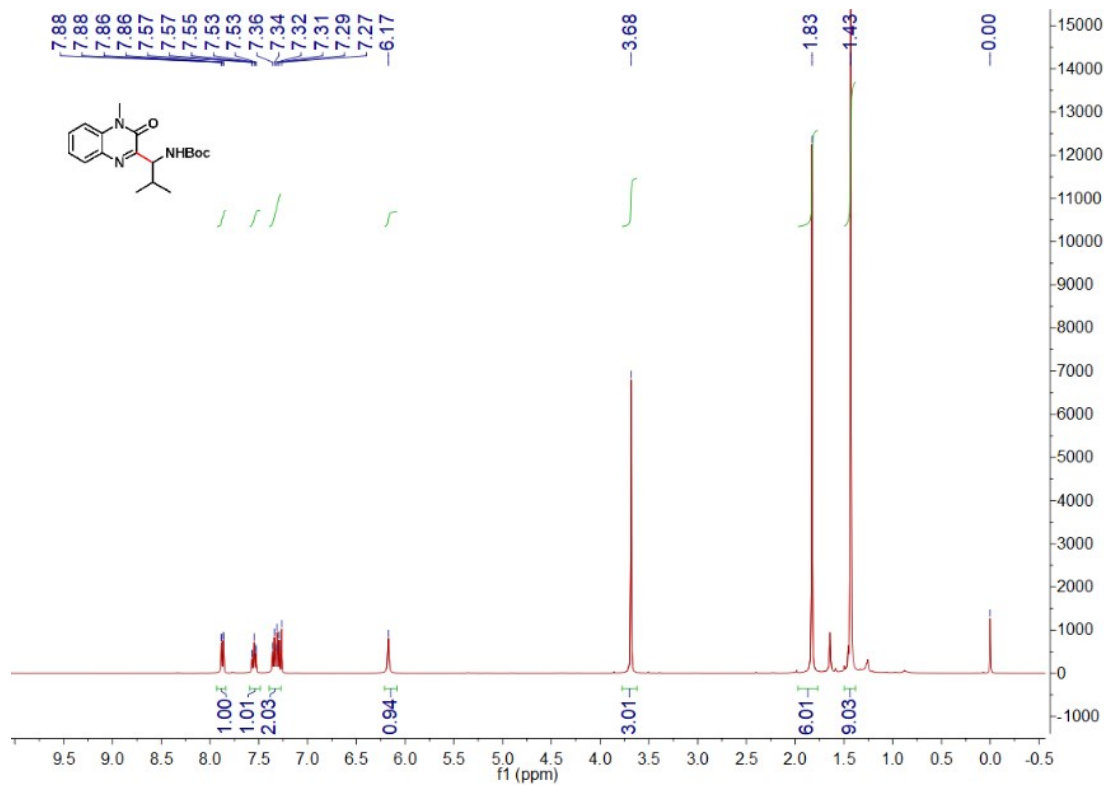

**<sup>13</sup>C NMR spectrum of compound 3ap**

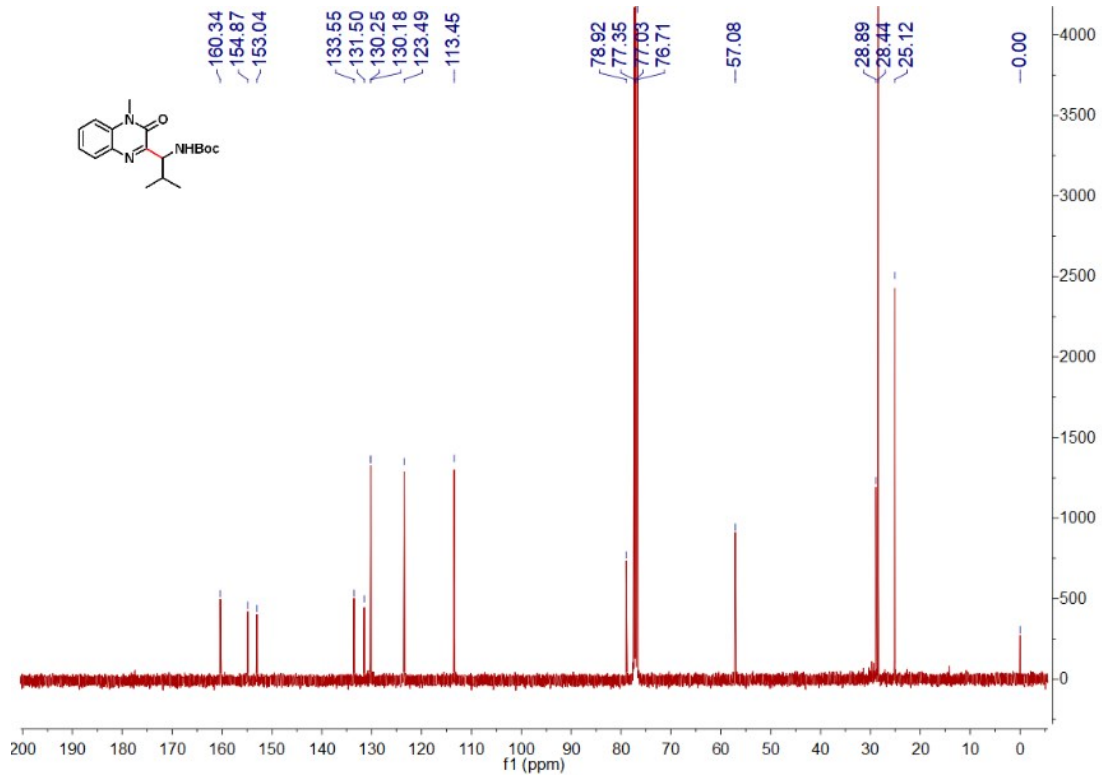

**<sup>1</sup>H NMR spectrum of compound 3a<sub>q</sub>**

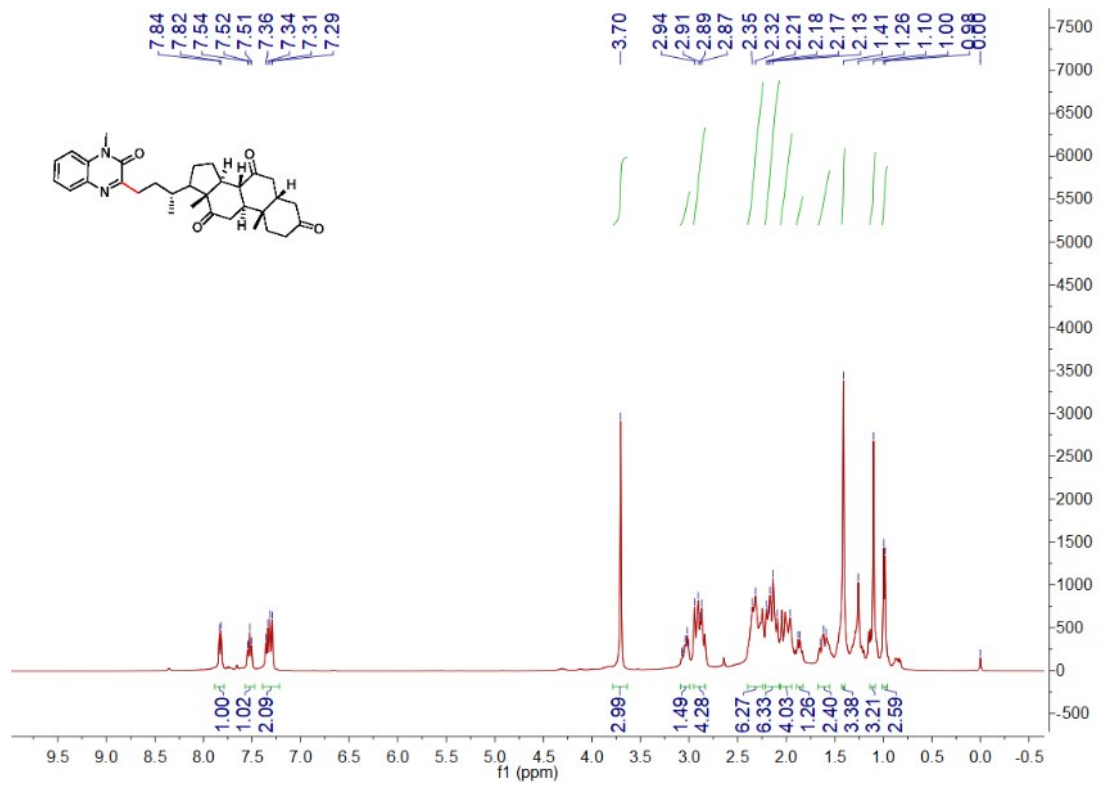

**<sup>13</sup>C NMR spectrum of compound 3a<sub>q</sub>**

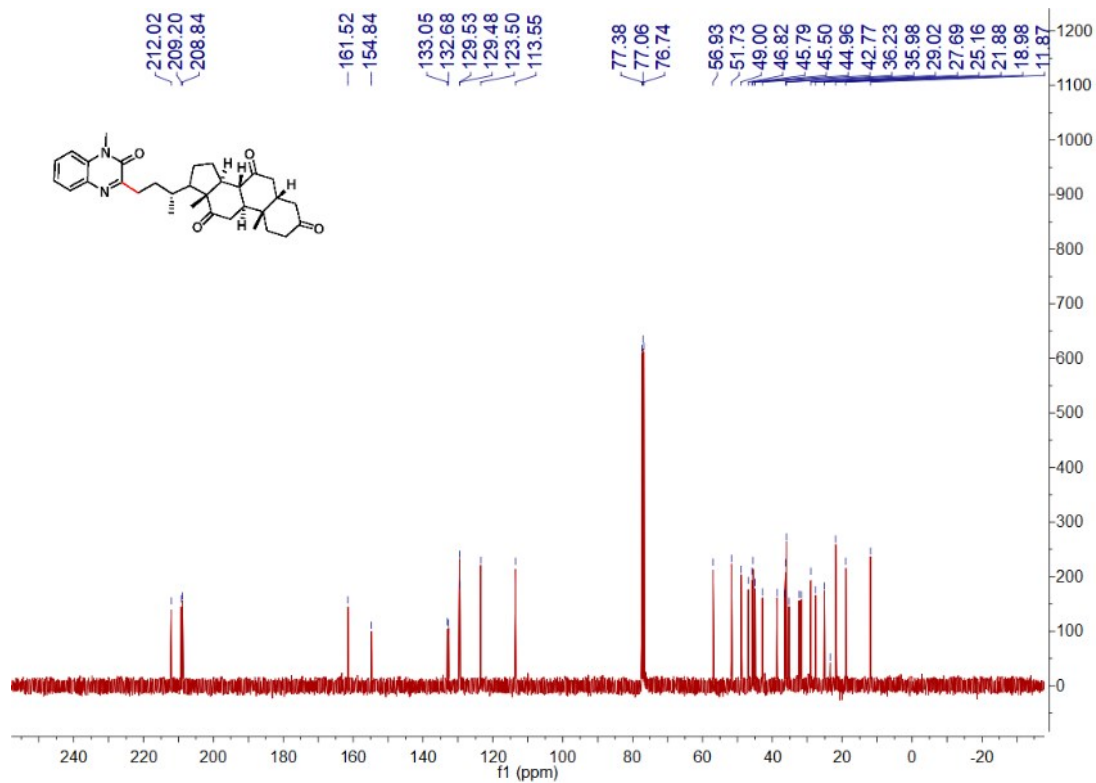

<sup>1</sup>H NMR spectrum of compound **3ba**

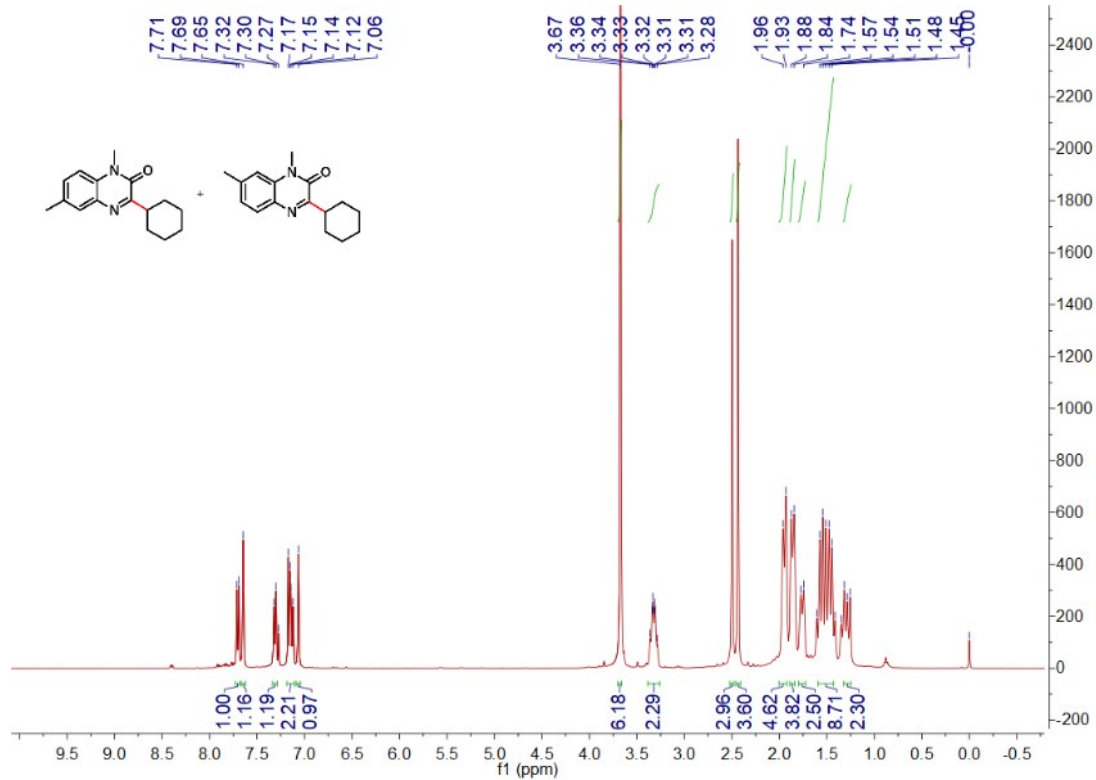

<sup>13</sup>C NMR spectrum of compound **3ba**

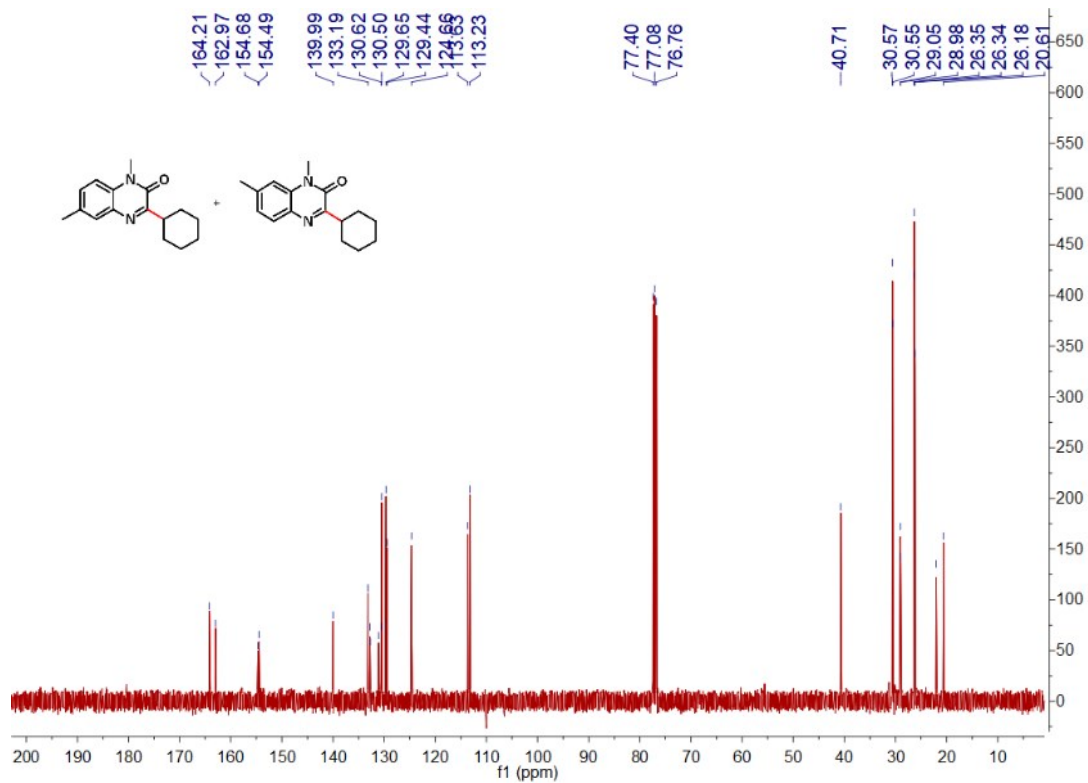

$^1\text{H}$  NMR spectrum of compound 3ca

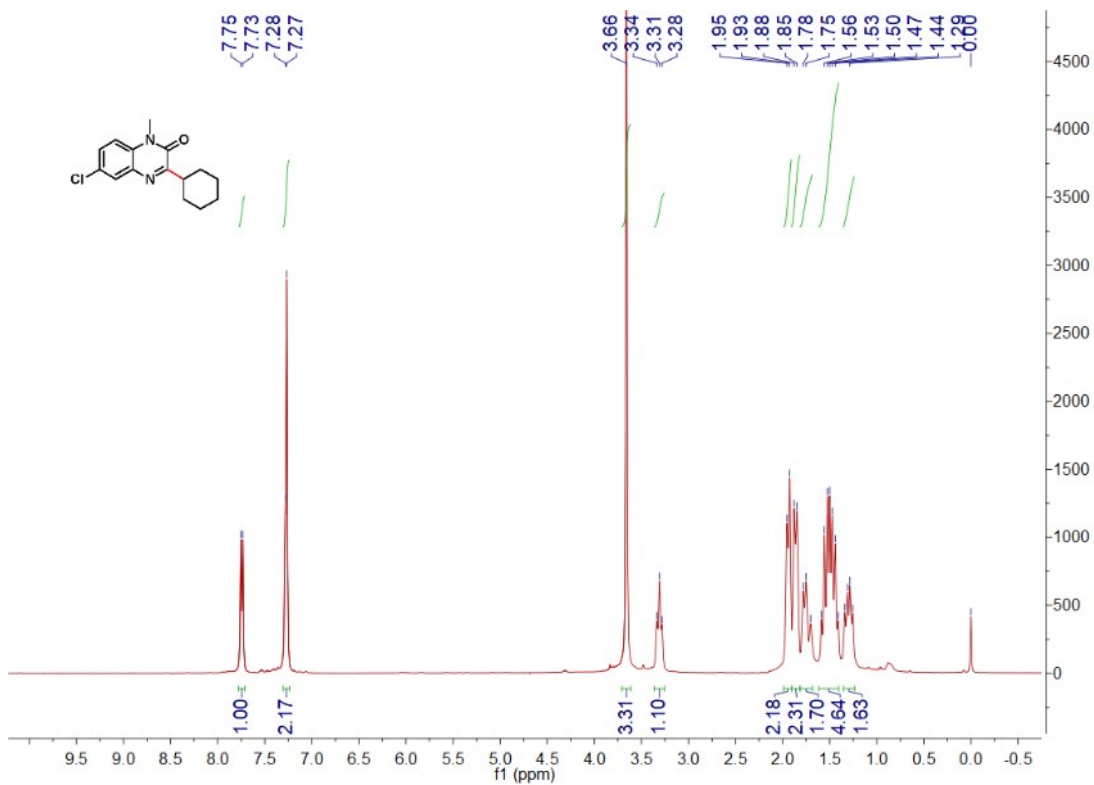

$^{13}\text{C}$  NMR spectrum of compound 3ca



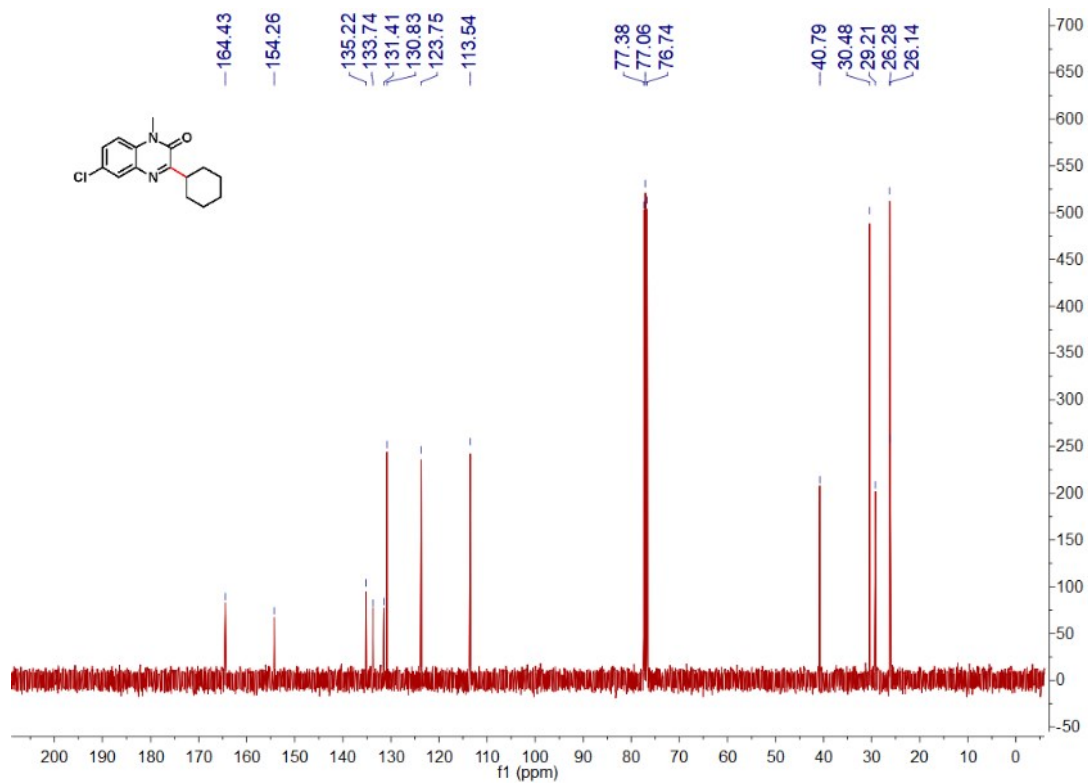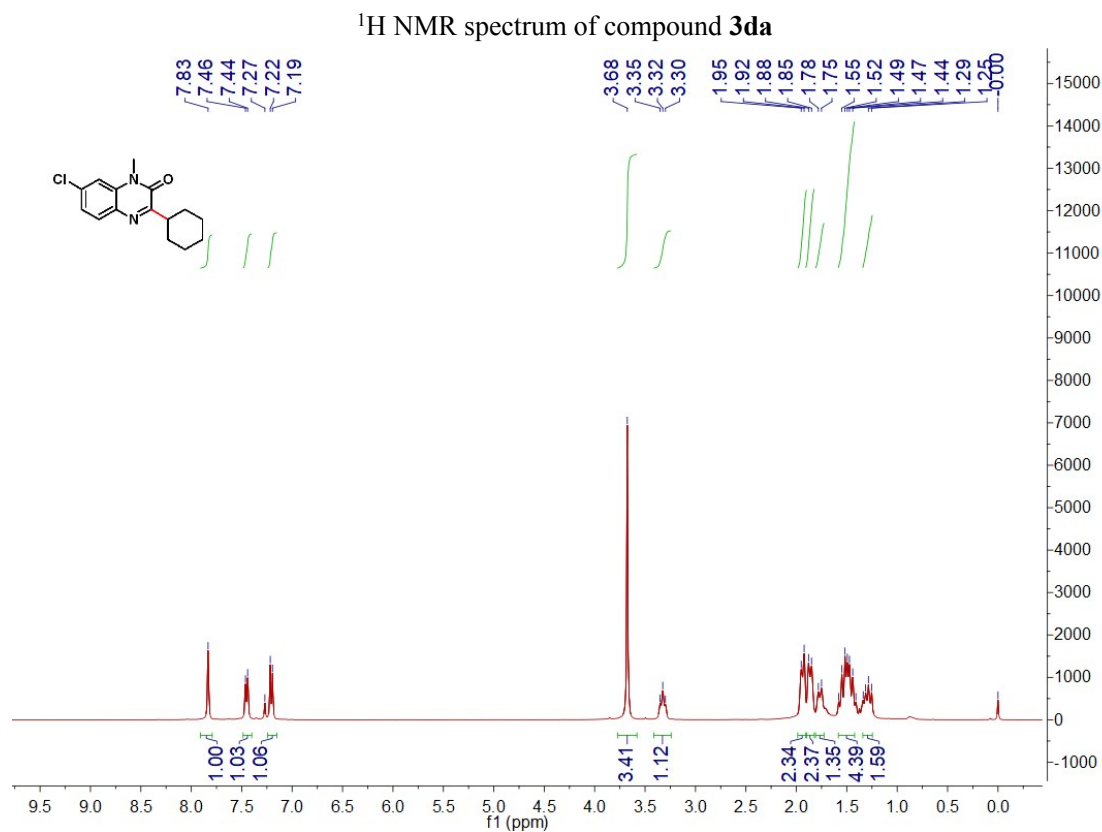

**<sup>13</sup>C NMR spectrum of compound 3da**



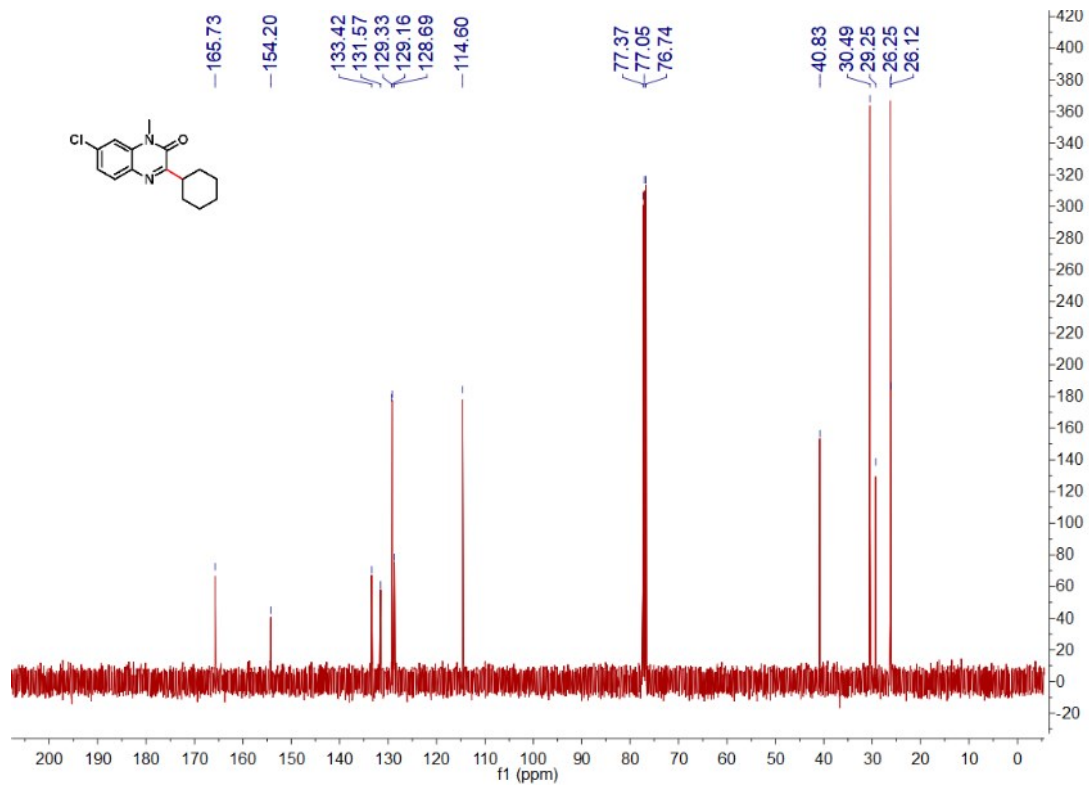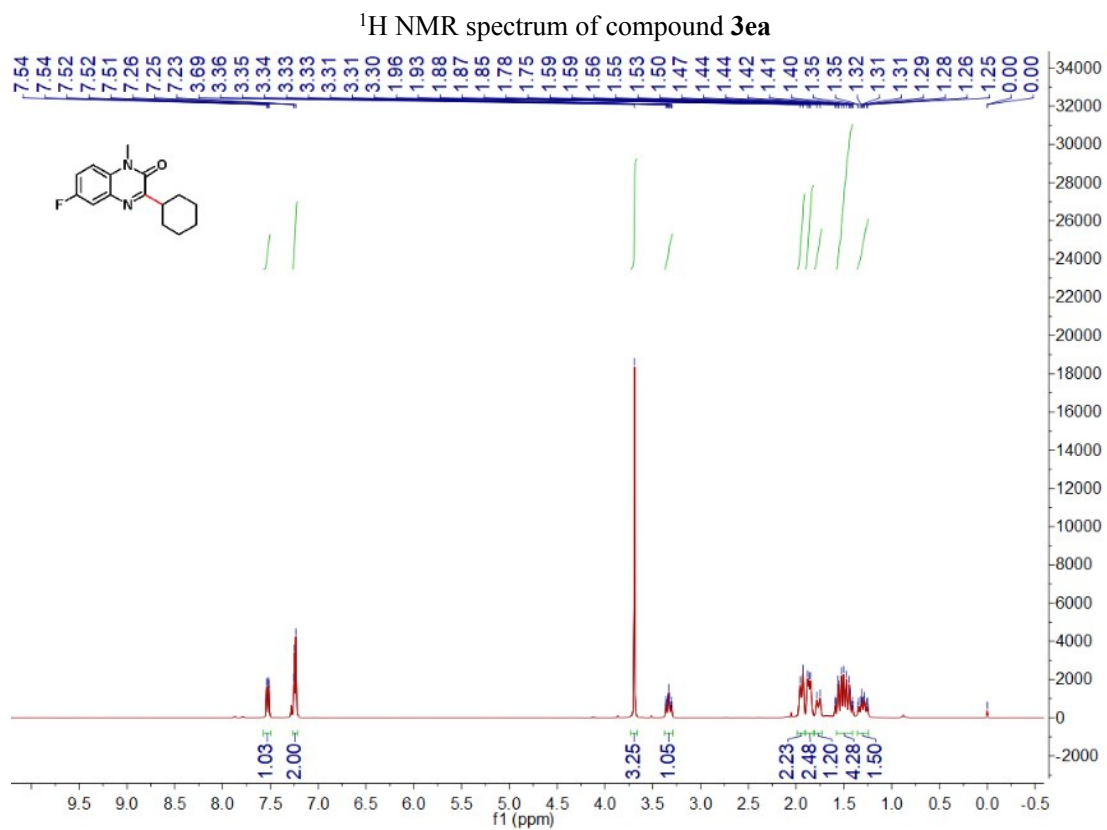

**<sup>13</sup>C NMR spectrum of compound 3a**

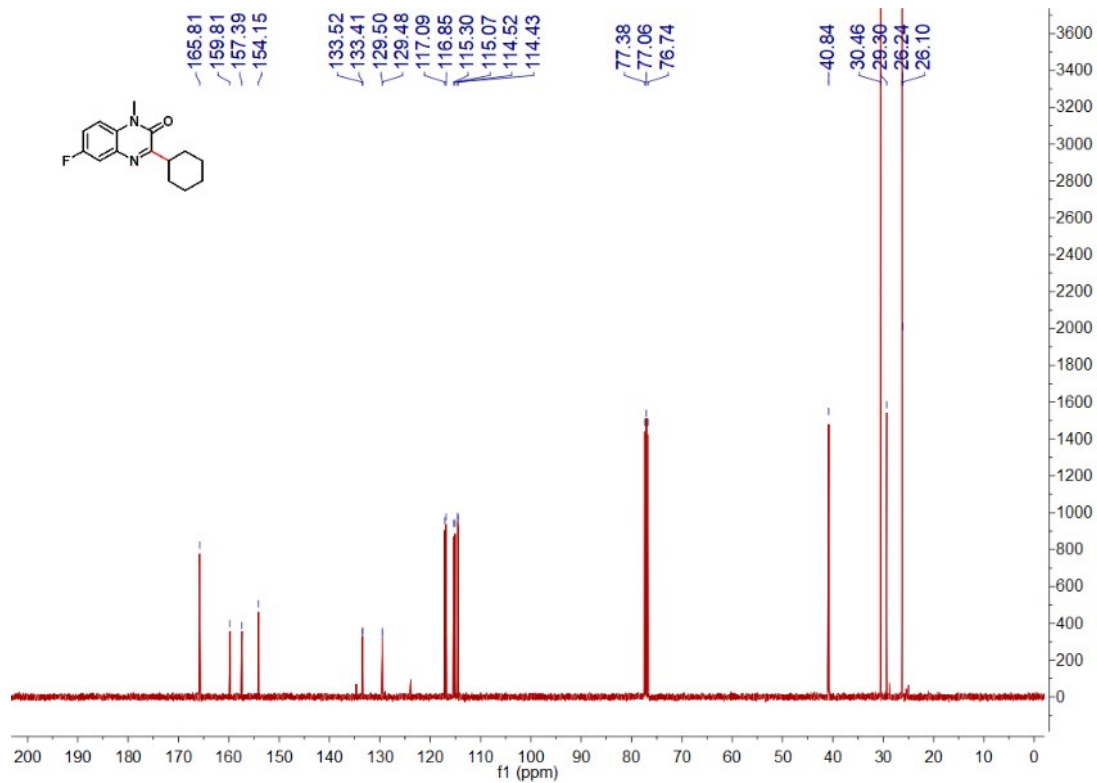

<sup>19</sup>F NMR spectrum of compound 3a

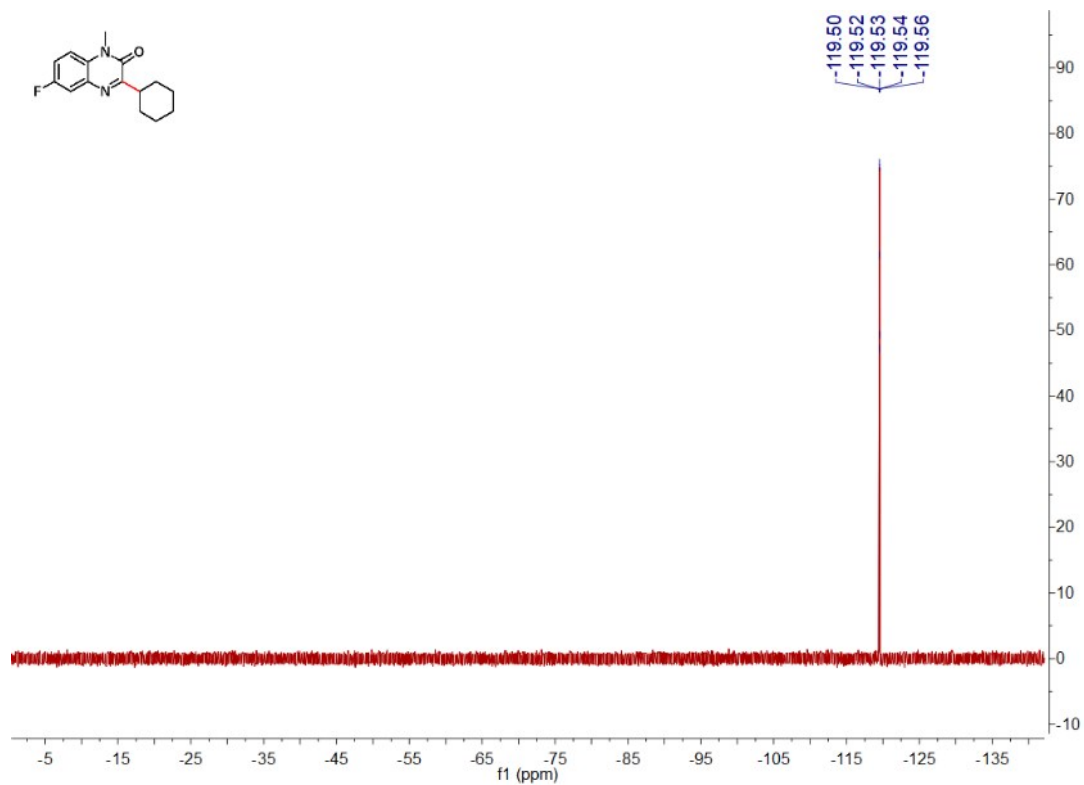

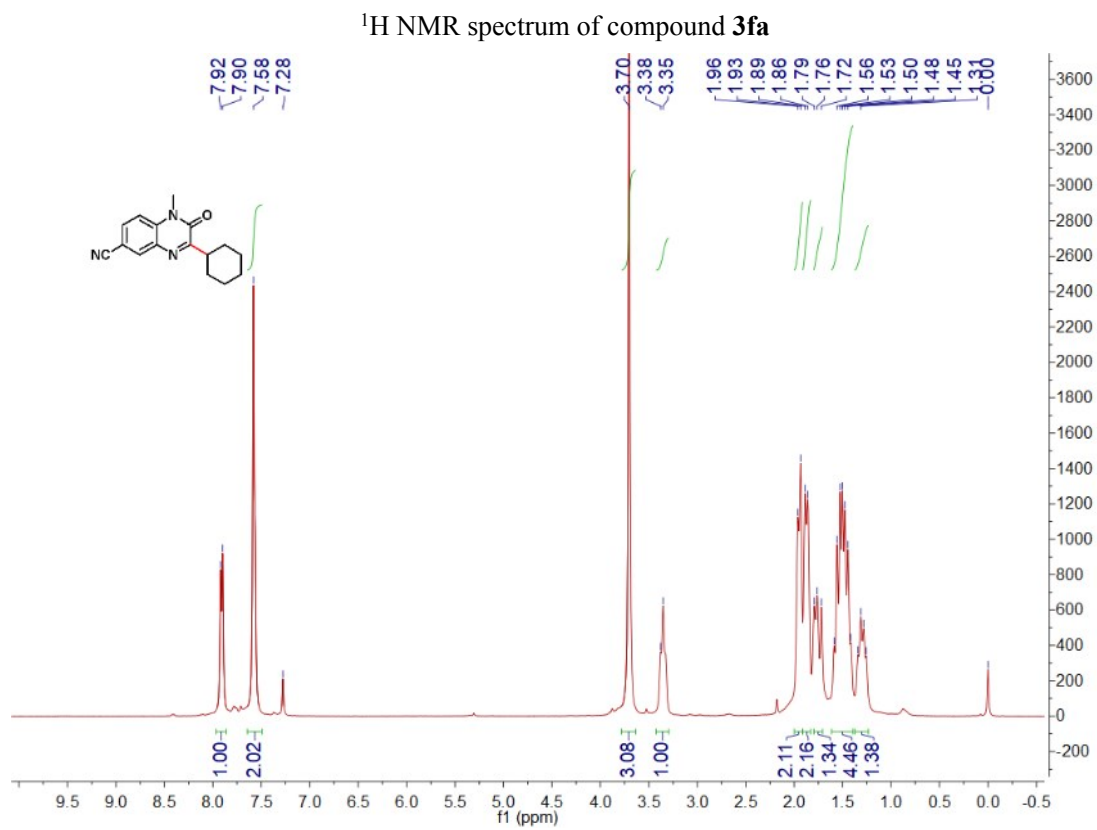

<sup>13</sup>C NMR spectrum of compound **3fa**

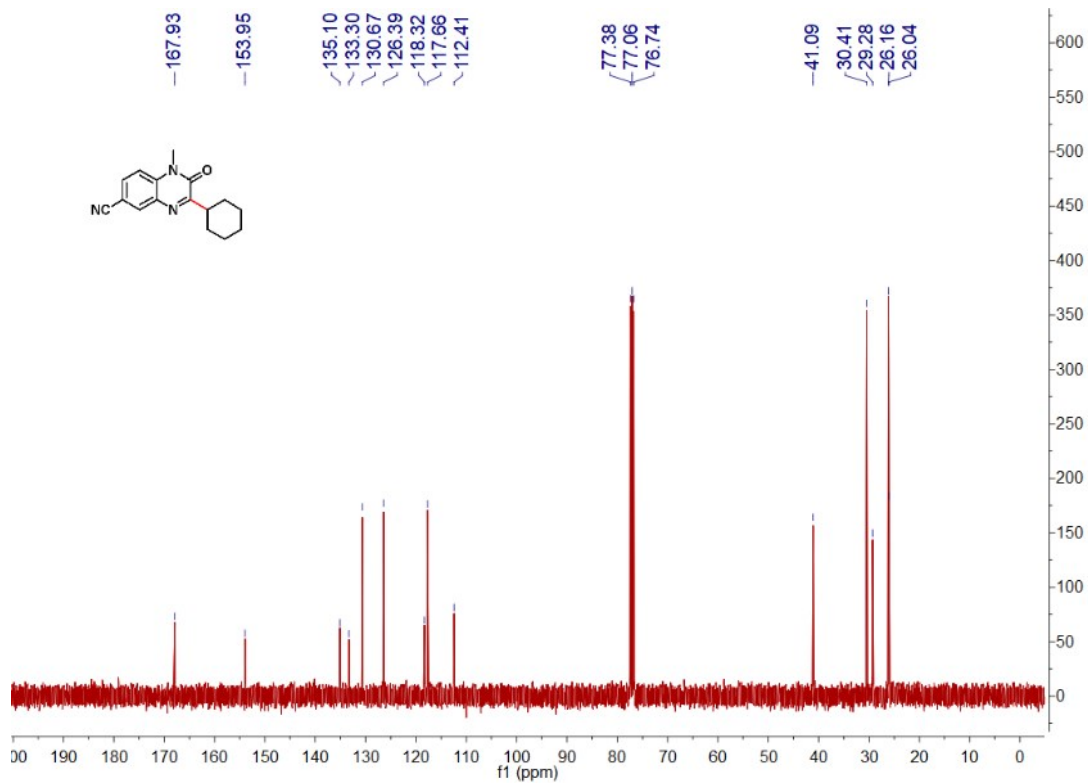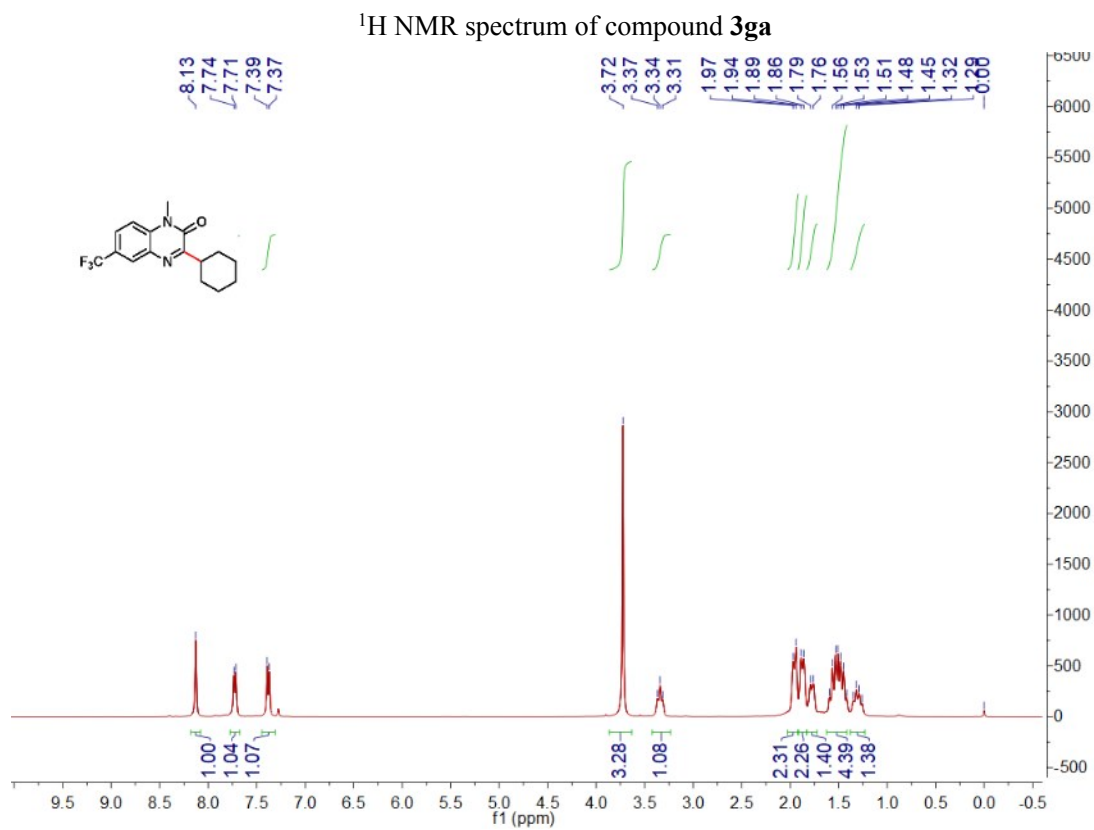

**<sup>13</sup>C NMR spectrum of compound 3ga**

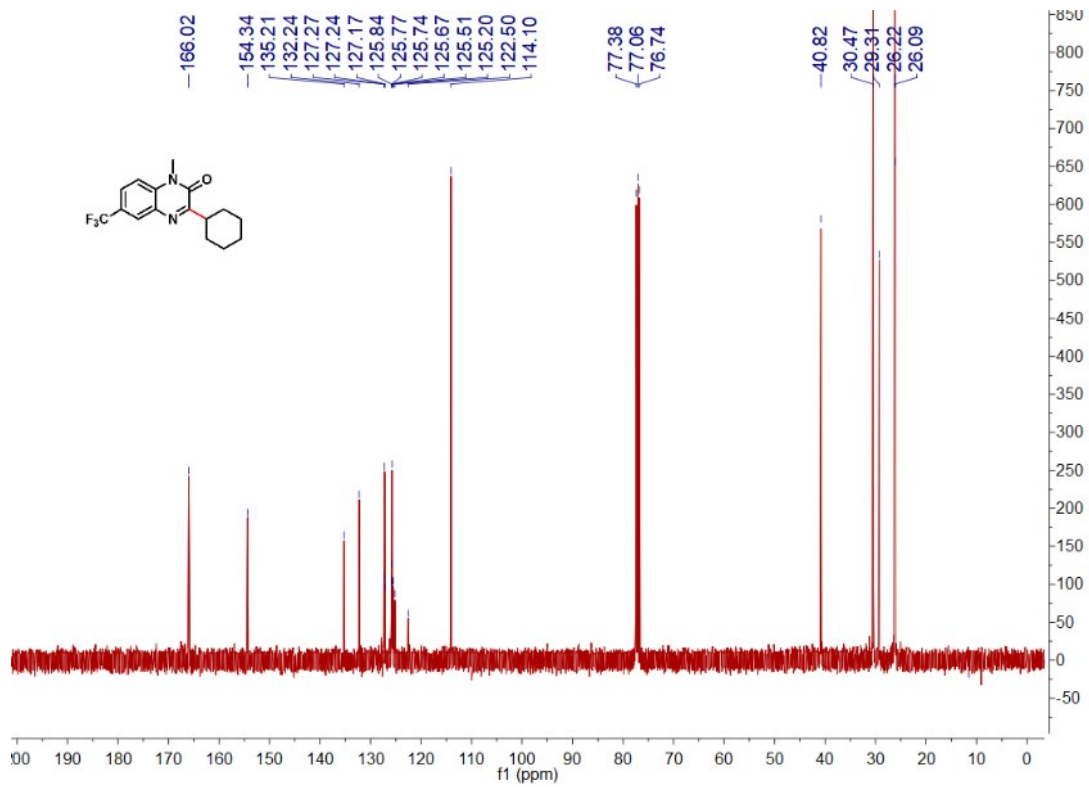

<sup>19</sup>F NMR spectrum of compound 3ga

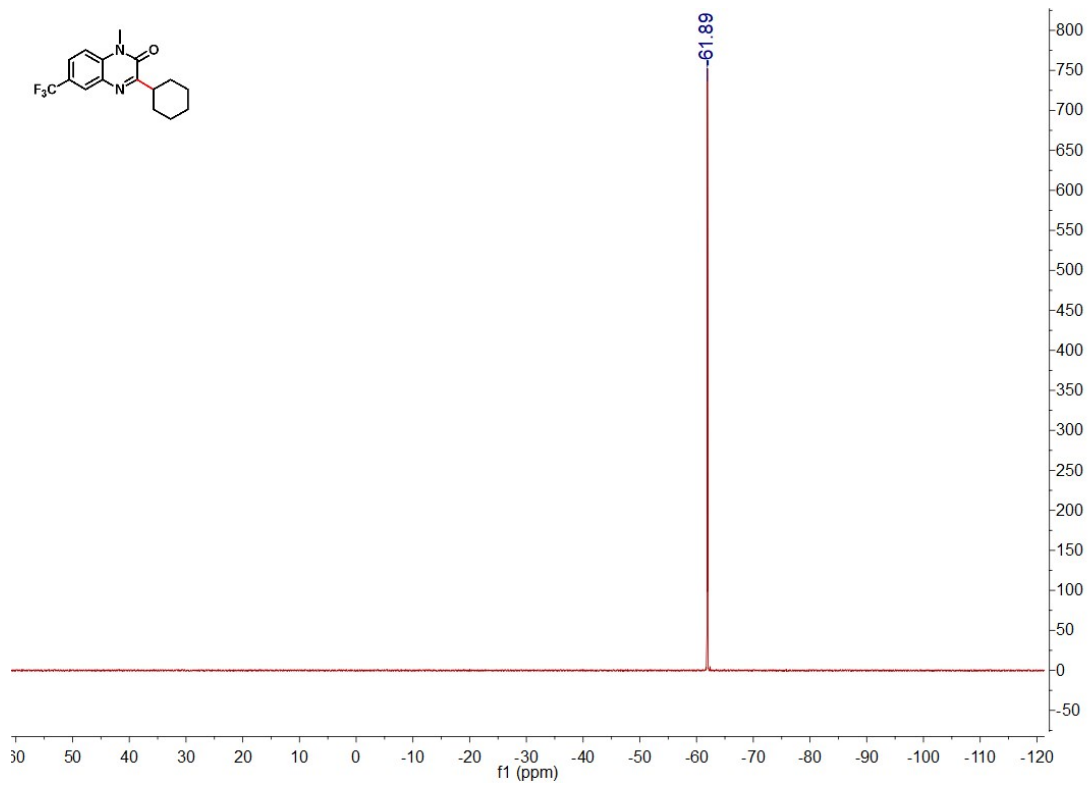

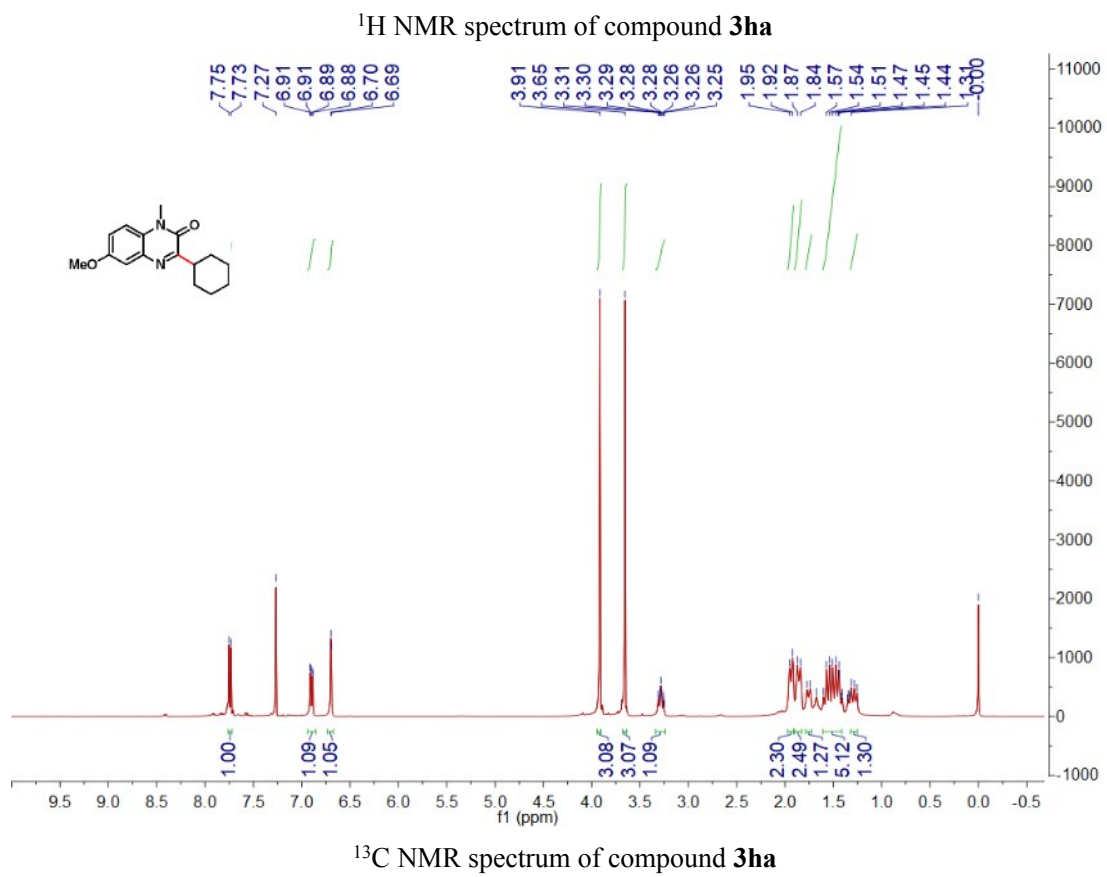

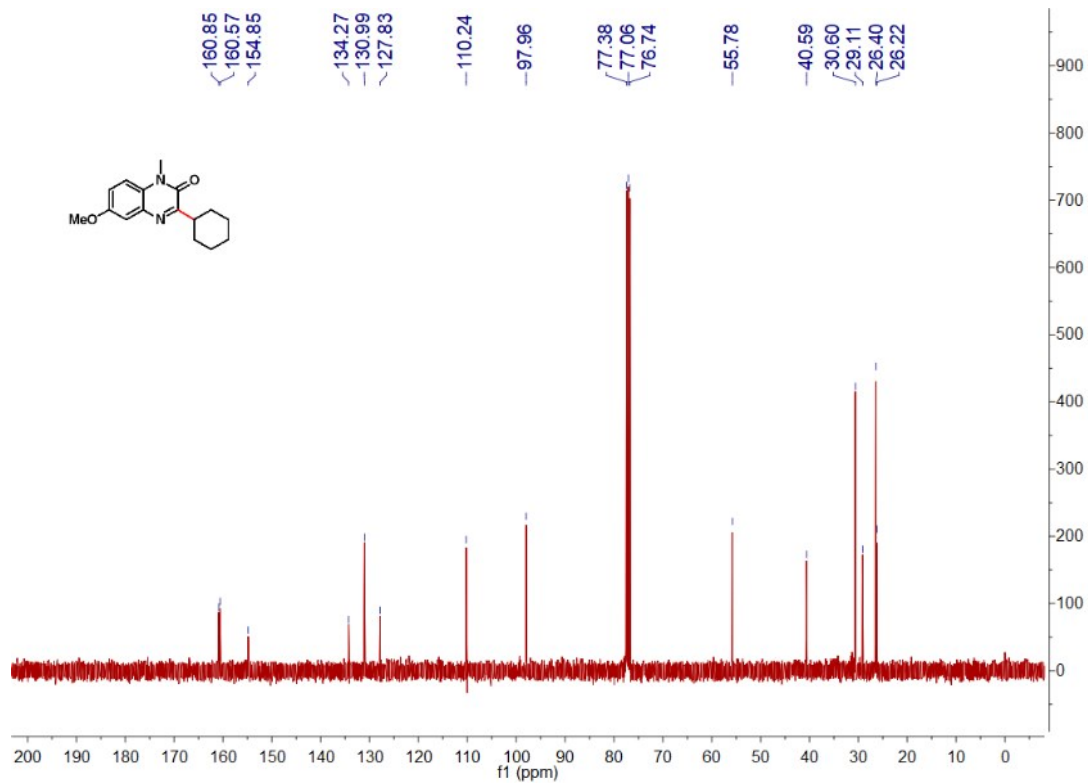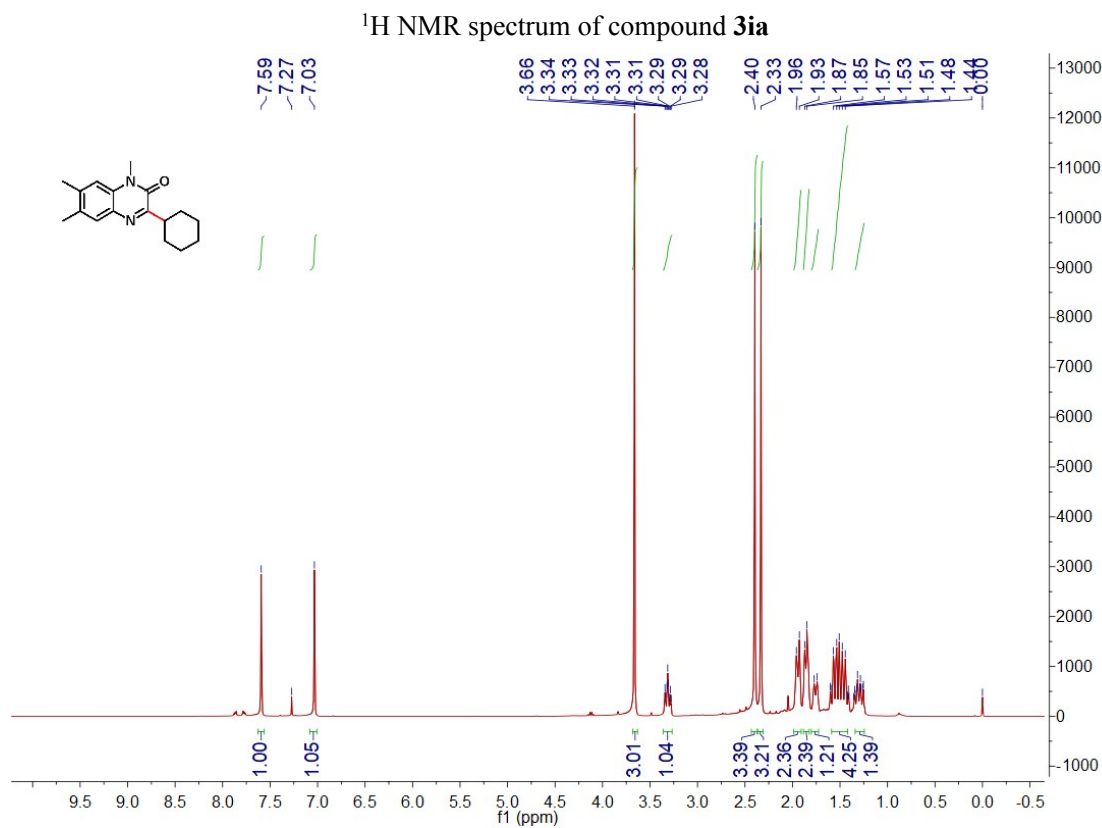

**<sup>13</sup>C NMR spectrum of compound 3ia**

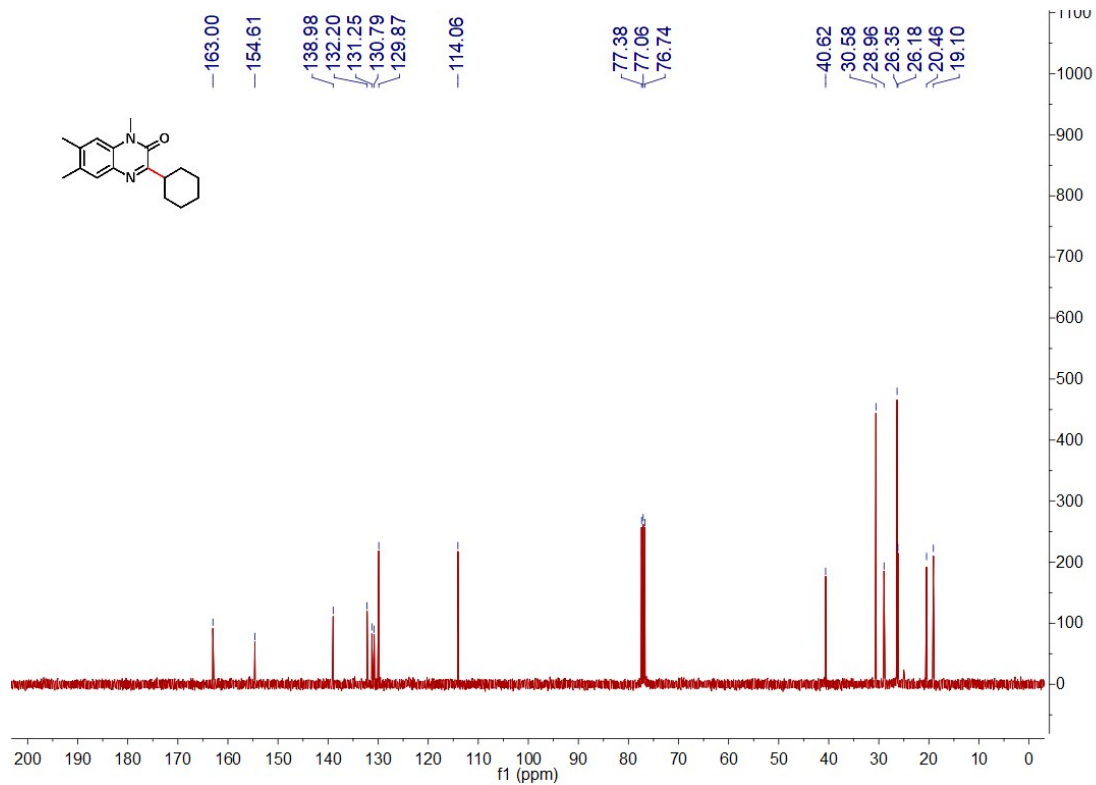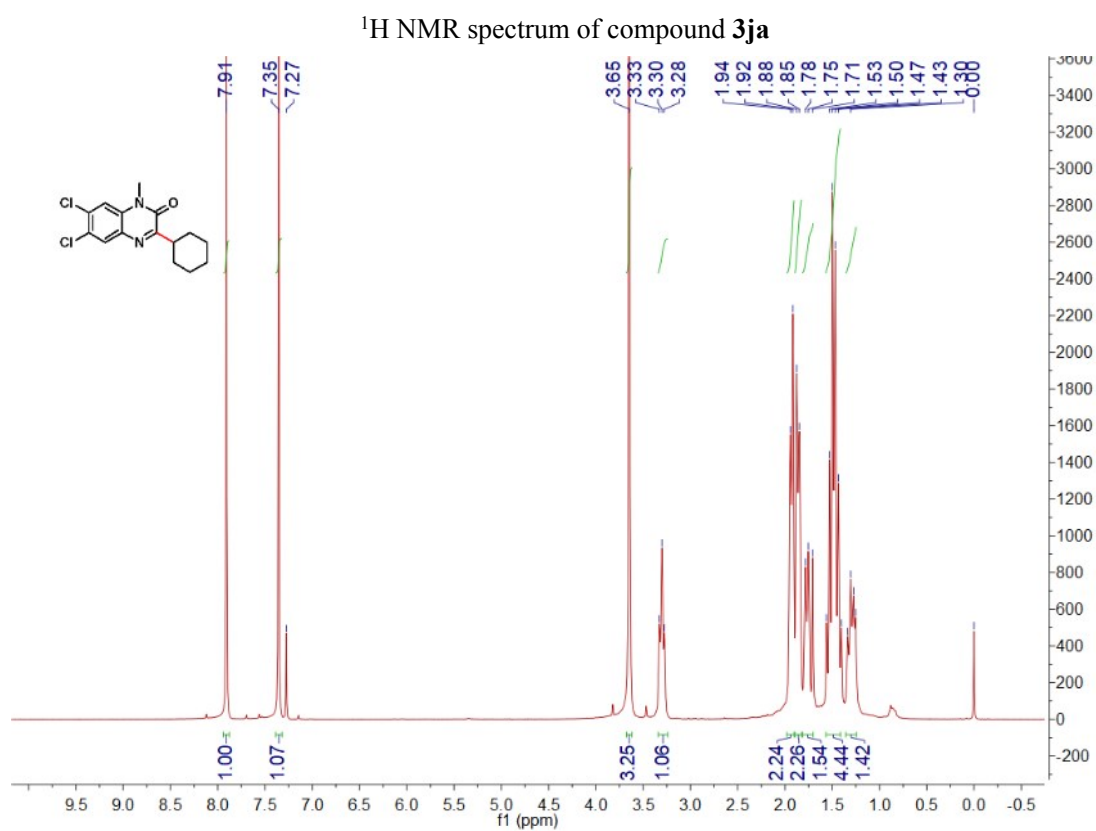

**<sup>13</sup>C NMR spectrum of compound 3ja**



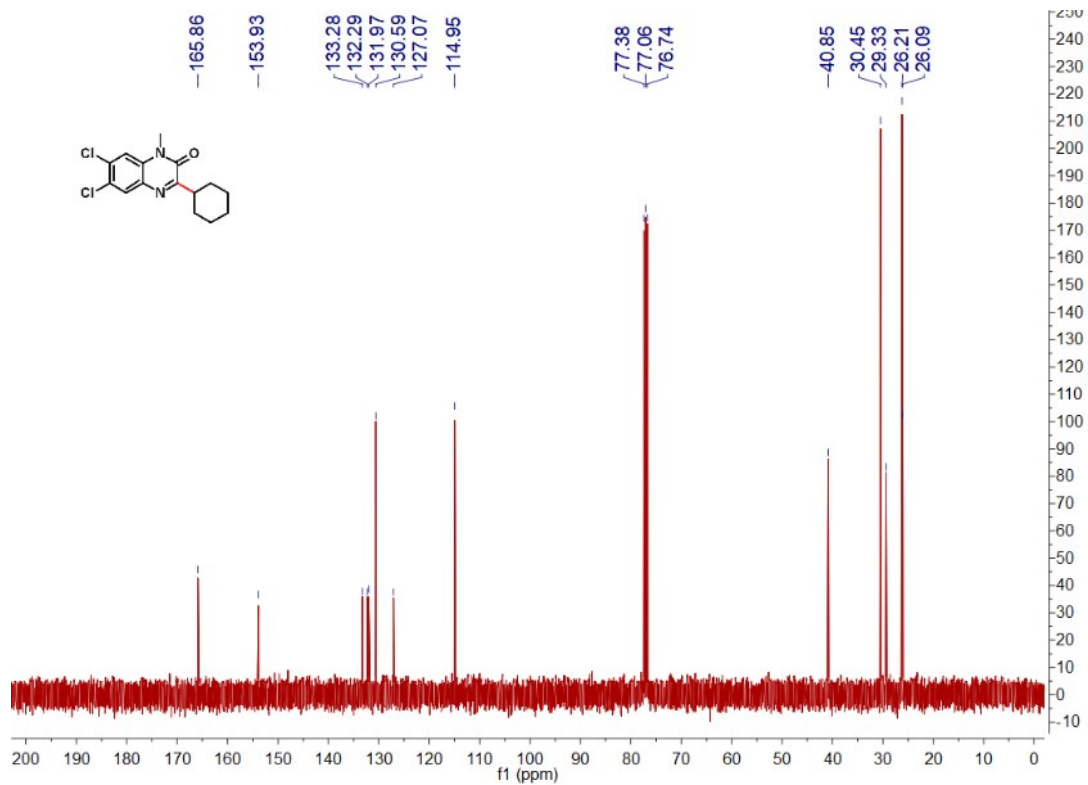

<sup>1</sup>H NMR spectrum of compound 3ka

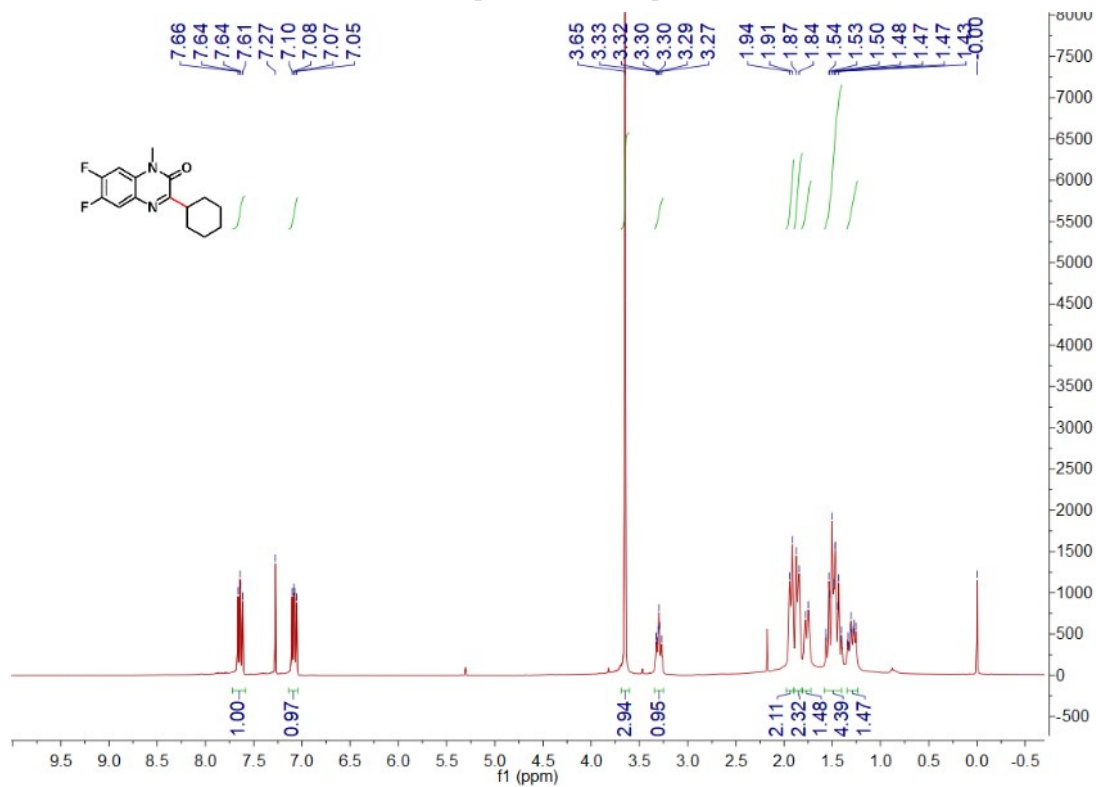

<sup>13</sup>C NMR spectrum of compound 3ka

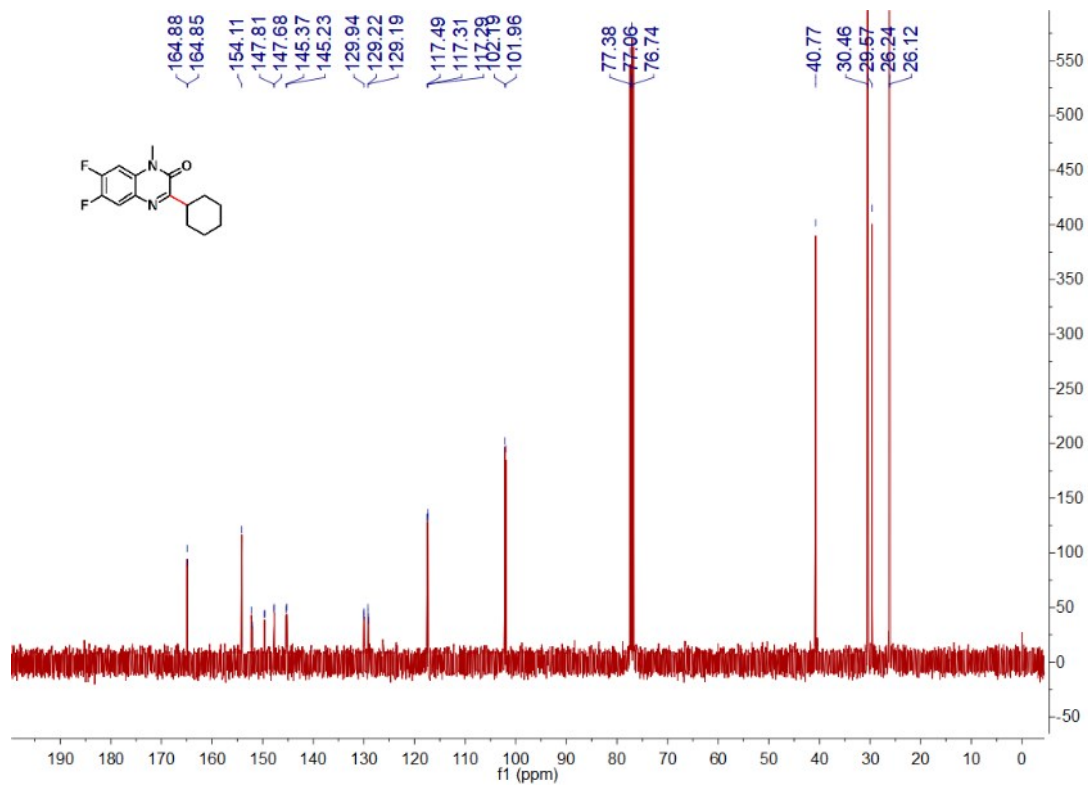

<sup>19</sup>F NMR spectrum of compound 3ka

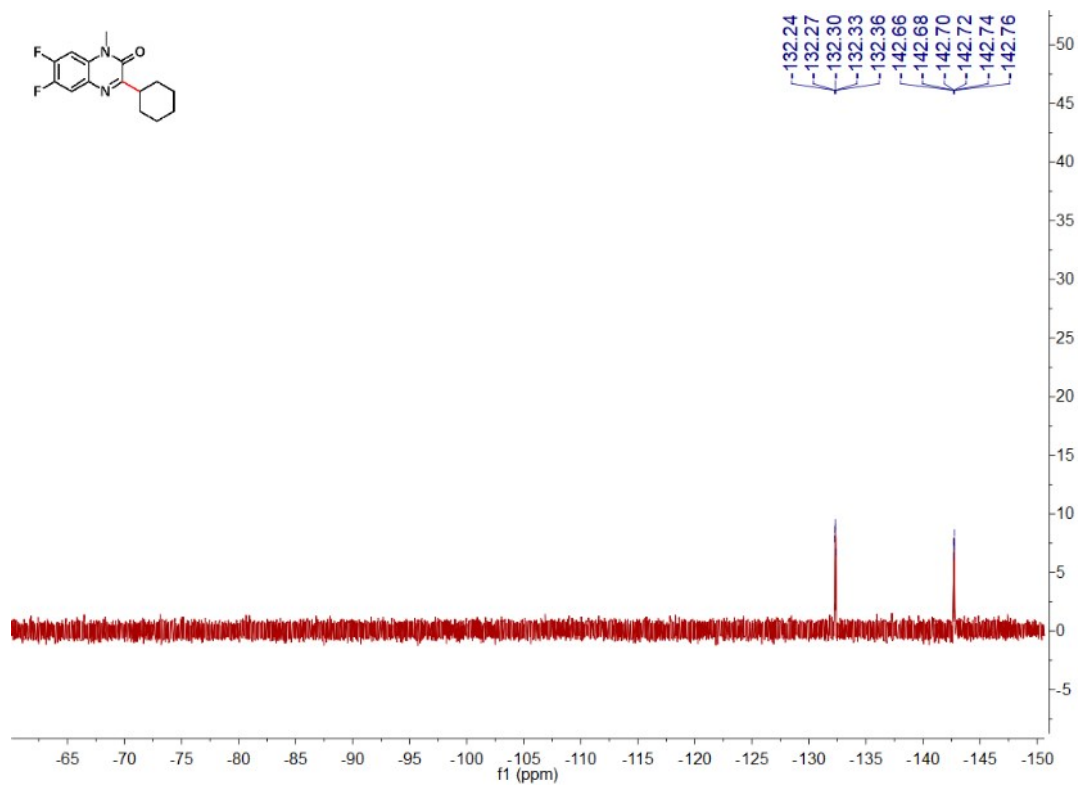

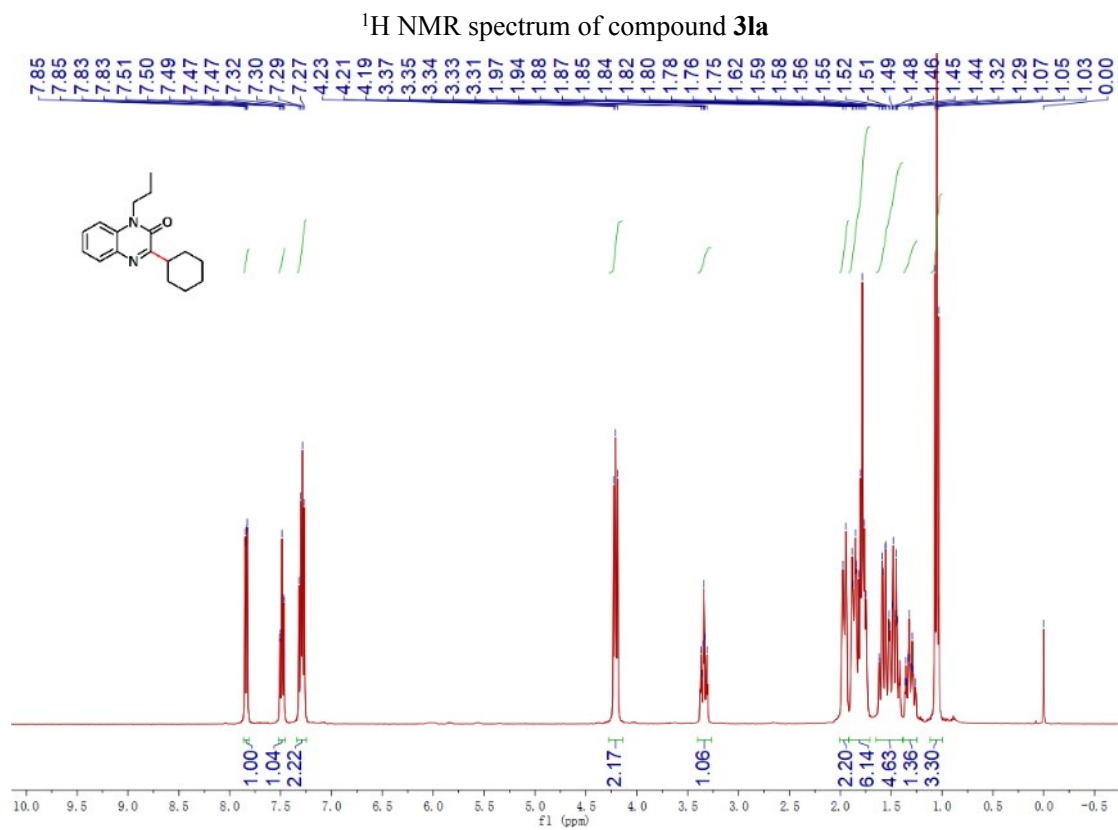

**<sup>13</sup>C NMR spectrum of compound 3la**

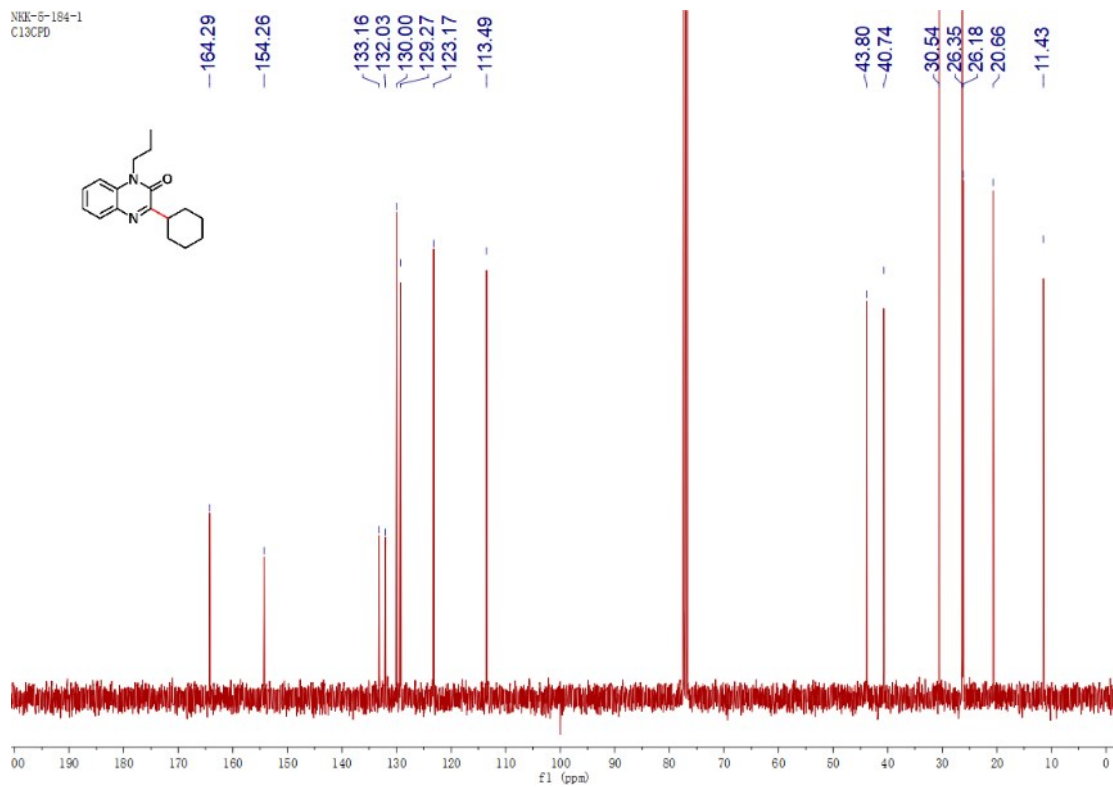

<sup>1</sup>H NMR spectrum of compound 3ma

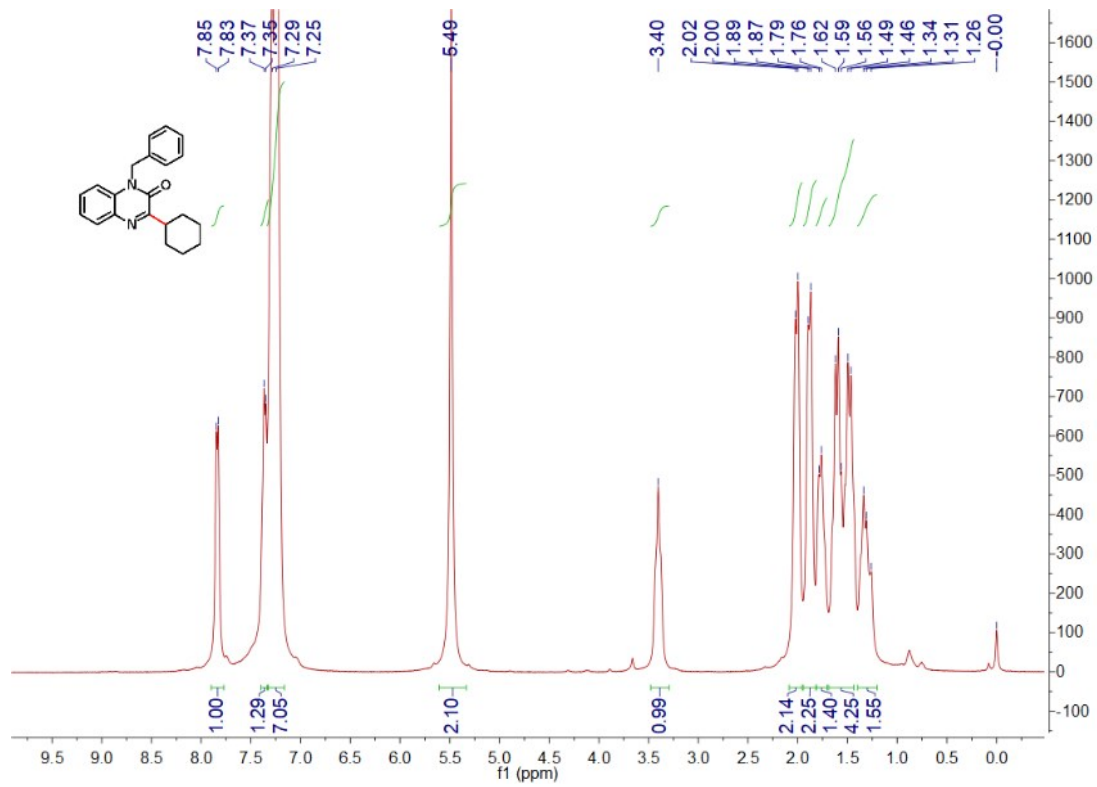

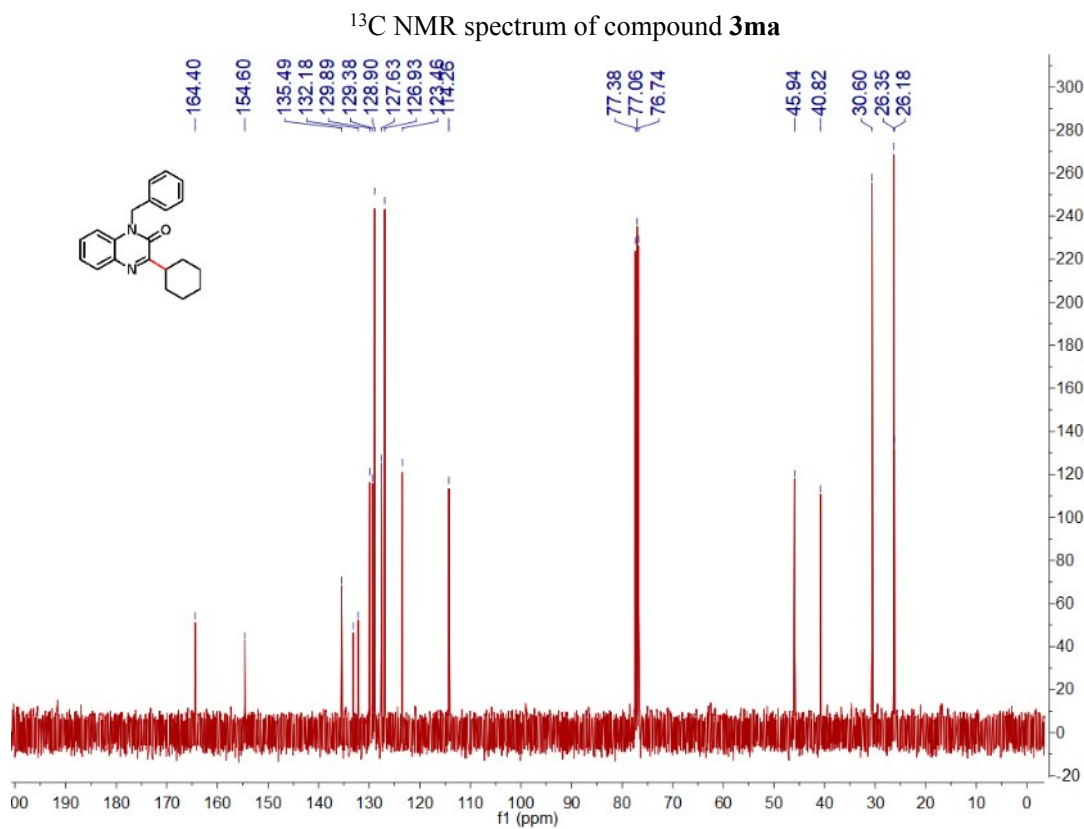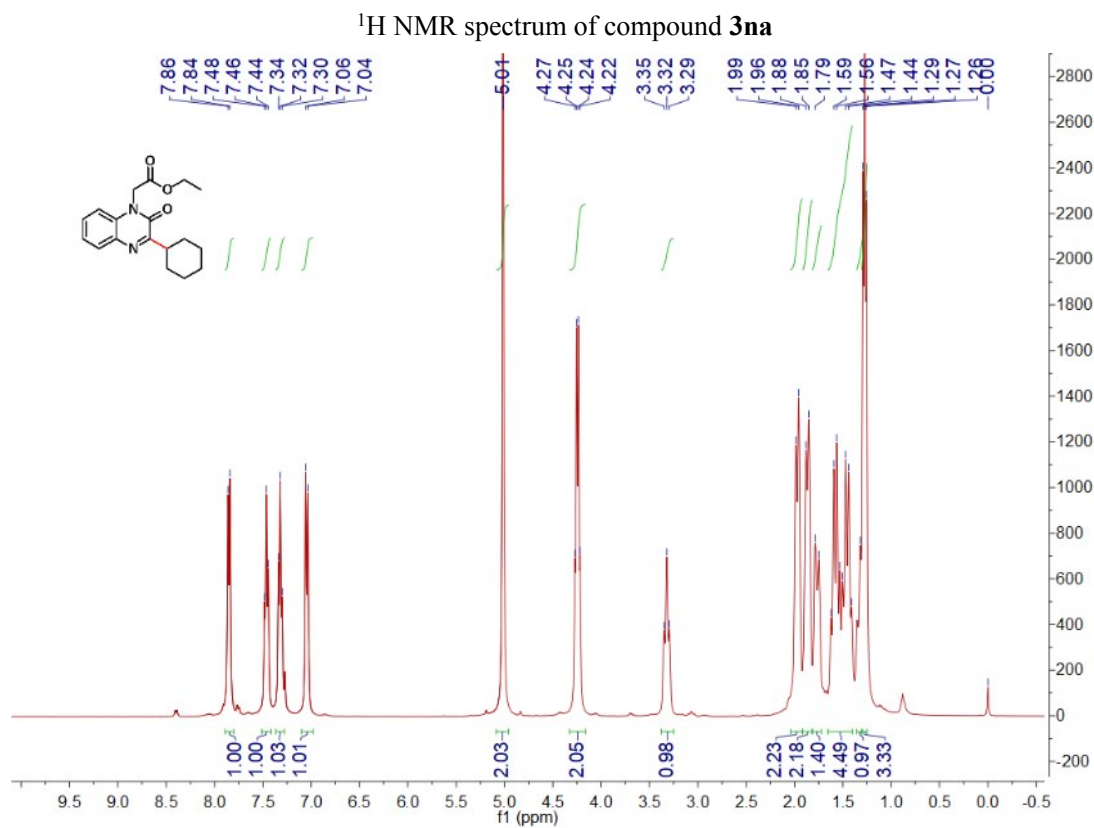

<sup>13</sup>C NMR spectrum of compound **3na**

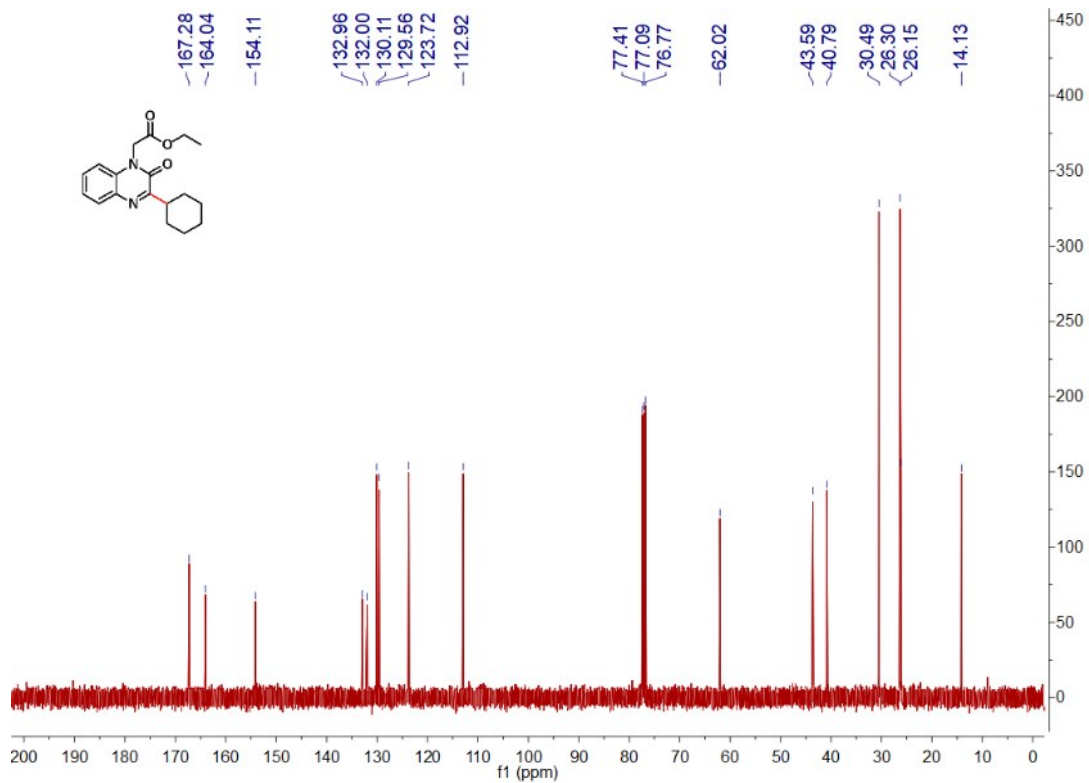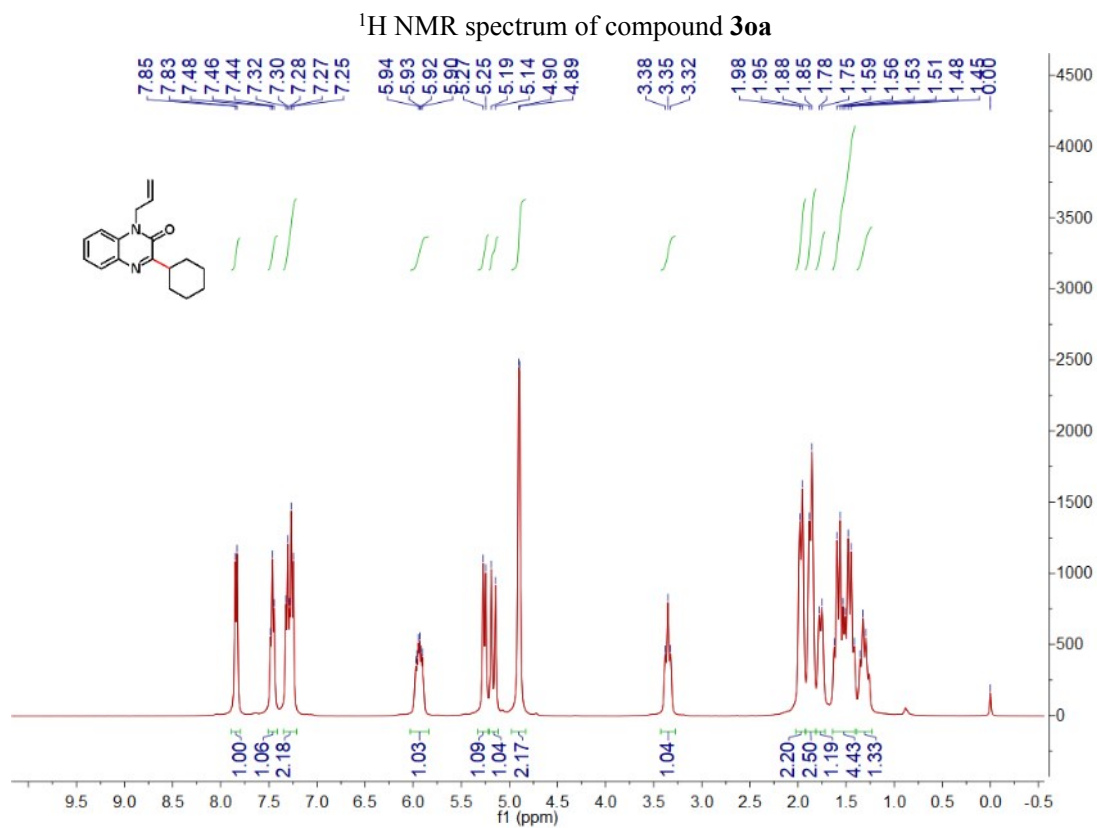

**<sup>13</sup>C NMR spectrum of compound 30a**

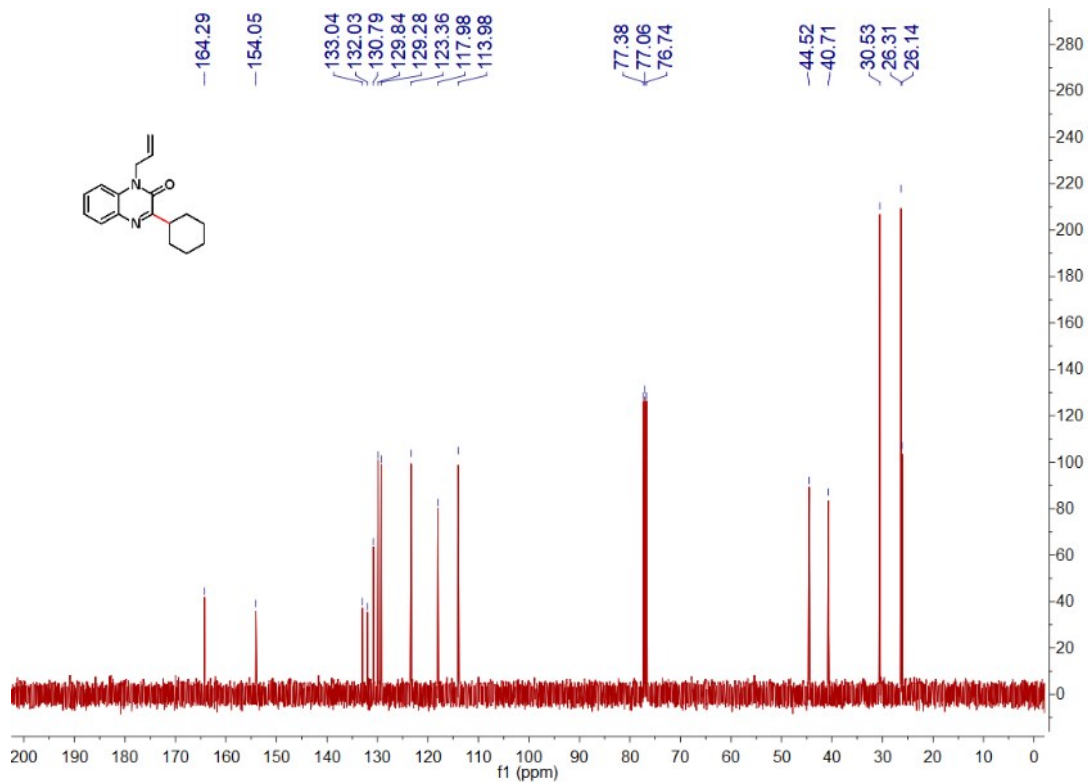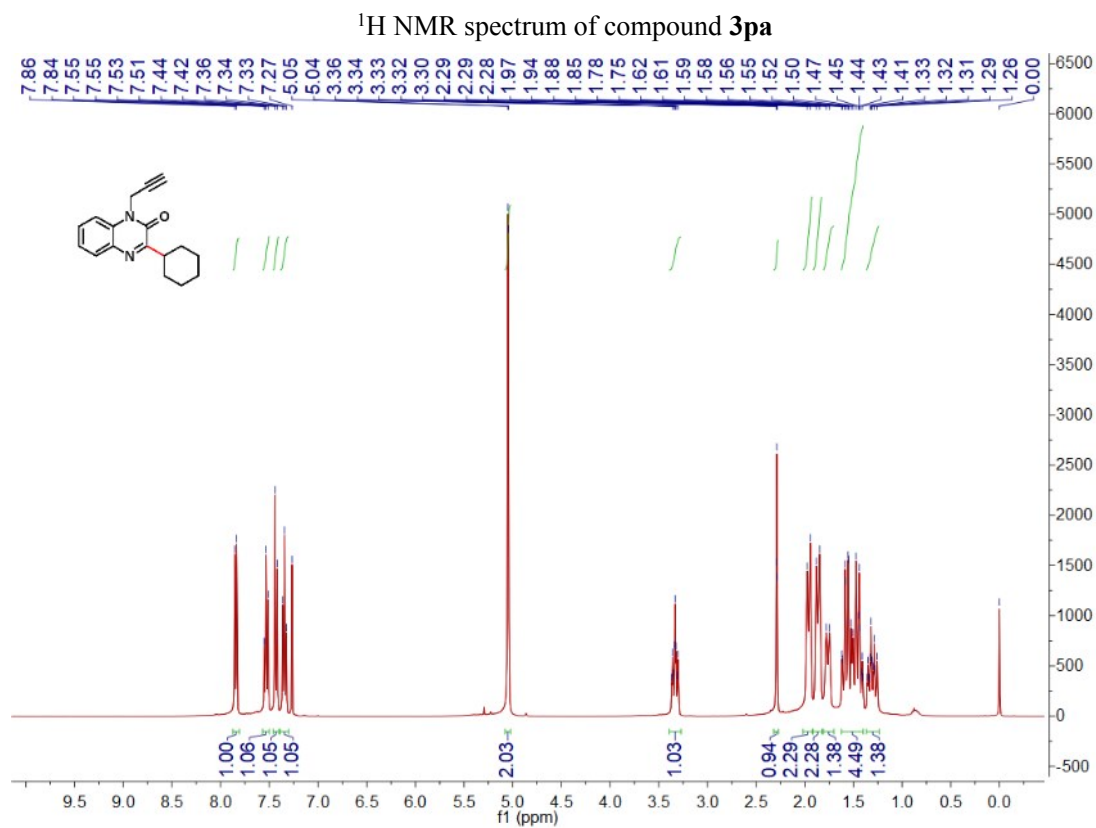

**<sup>13</sup>C NMR spectrum of compound 3pa**



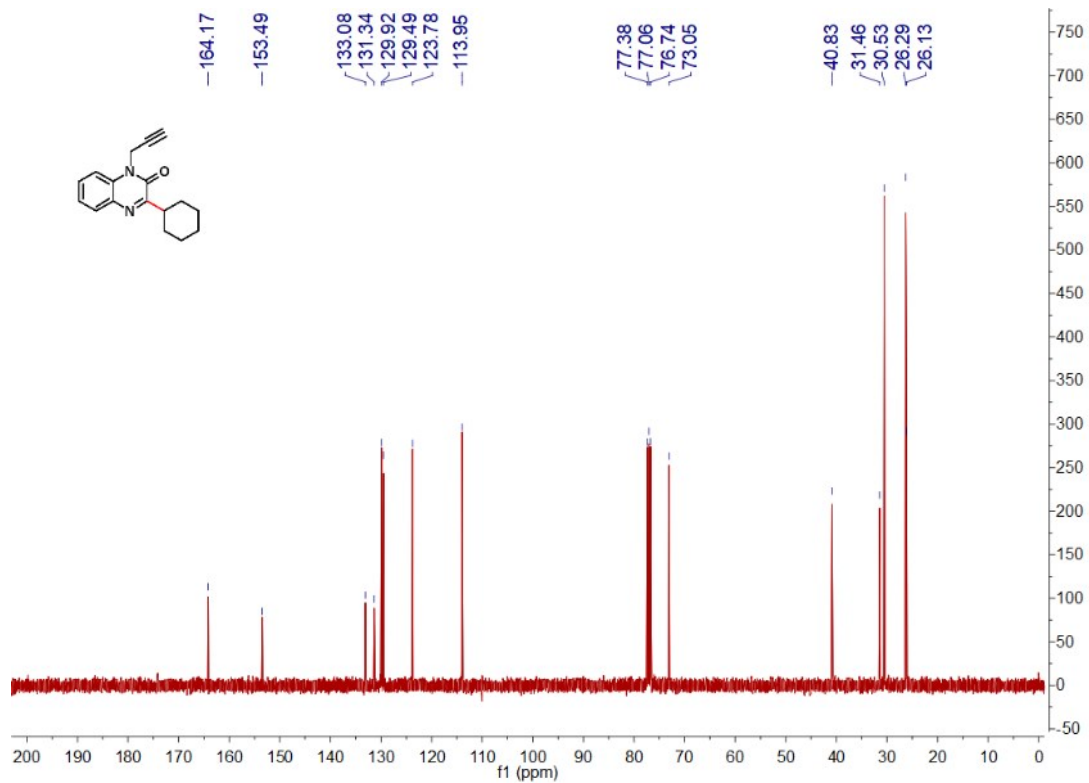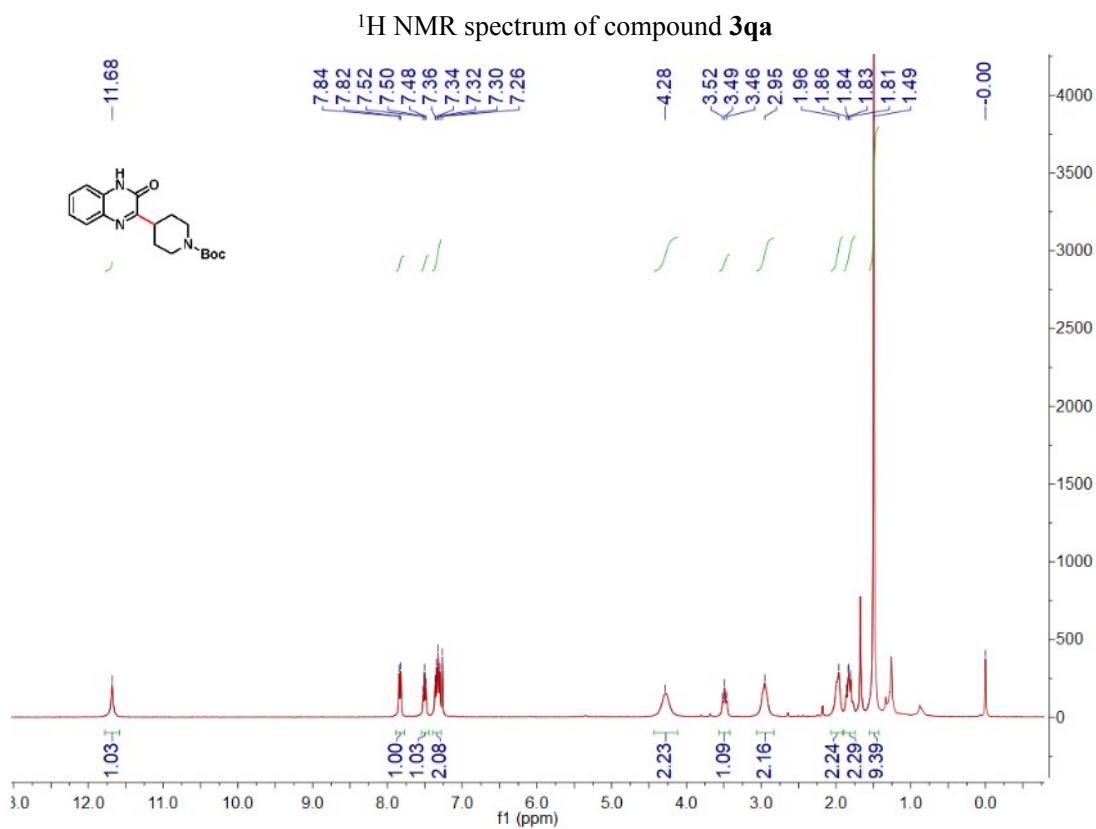



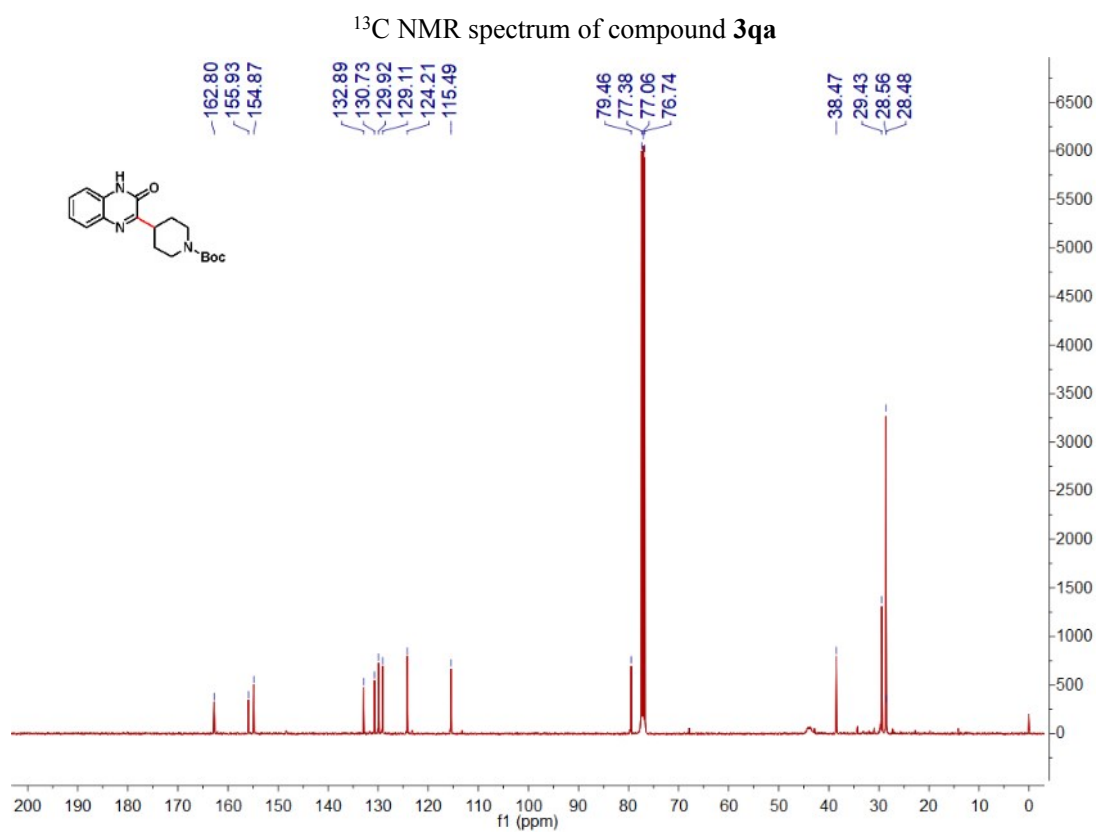

## 12. Reference

1. J. Cornella, J. T. Edwards, T. Qin, S. Kawamura, J. Wang, C. M. Pan, R. Gianatassio, M. Schmidt, M. D. Eastgate, P. S. Baran, *J. Am. Chem. Soc.* **2016**, *138*, 2174-7.
2. M. Gao, Y. Li, L. Xie, R. Chauvin, X. Cui, *Chem. Commun.* **2016**, *52*, 2846-9.
